# Supplementary material for: Probabilistic population forecasting: Short to very long-term
Source: PubMed Central journal article supplement — Int J Forecast. Author manuscript; Available in PMC 2023 Jan 1. (PMC9783793; doi:10.1016/j.ijforecast.2021.09.001), 2021-10-07

# Supplementary Materials for “Probabilistic Population Forecasting: Short to Very Long-Term”

16 March, 2021

## A Total fertility rates for all countries

Red: long-term projections Blue: WPP 2019 PI: Solid - median Dashed - 80% Dotted - 95%

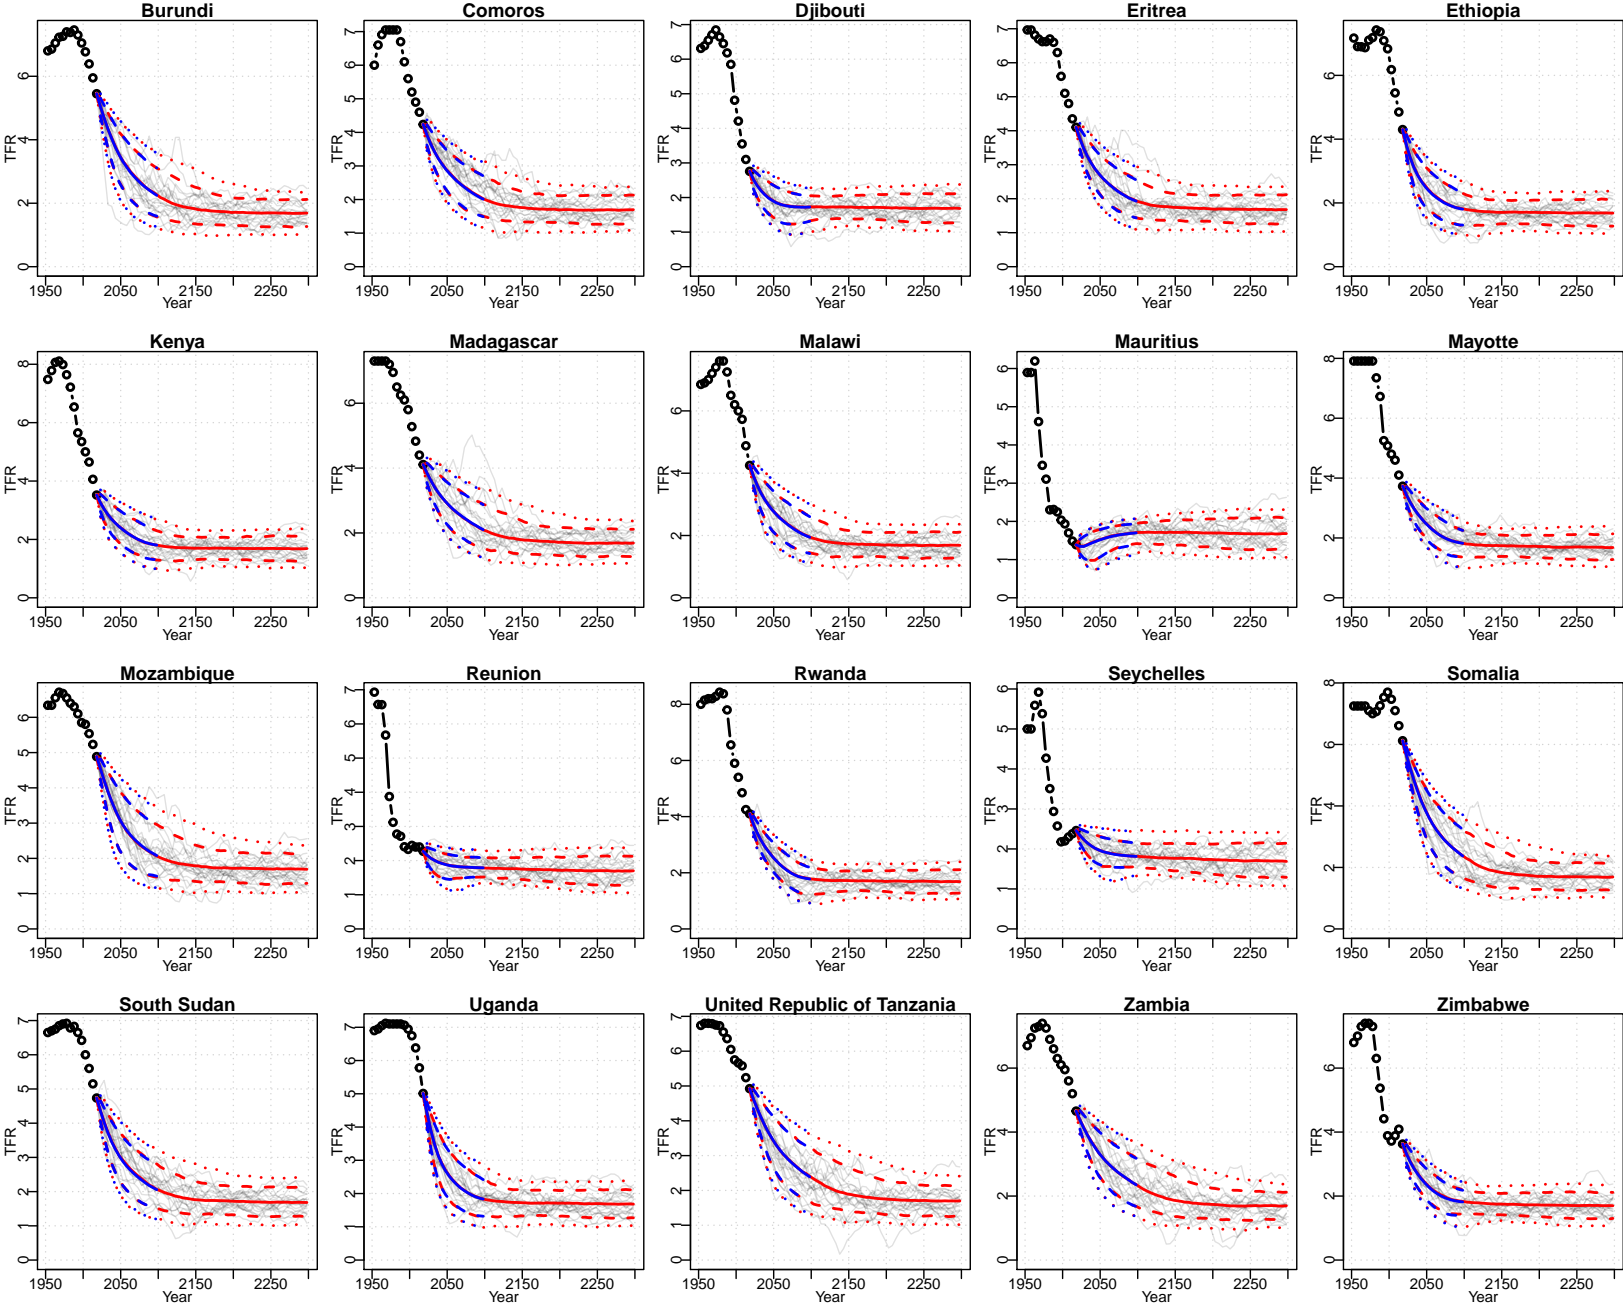

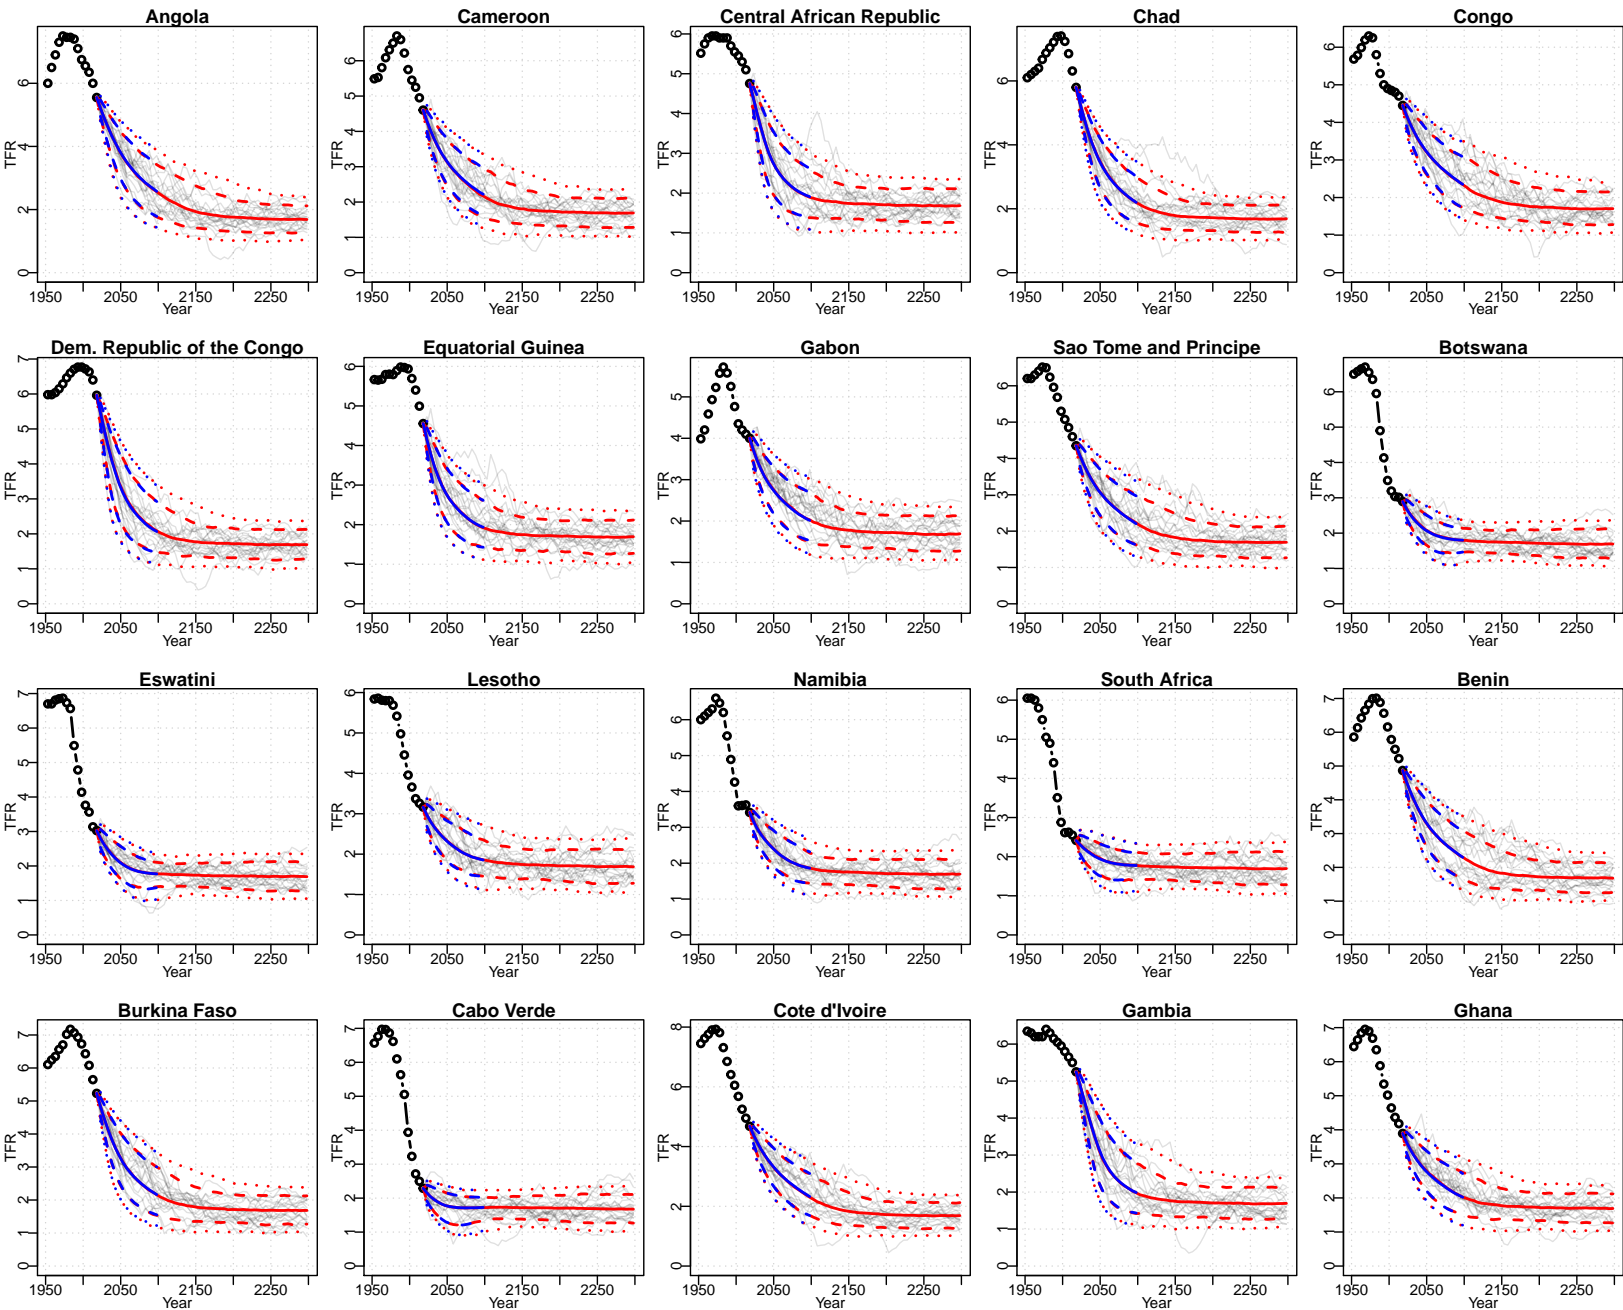

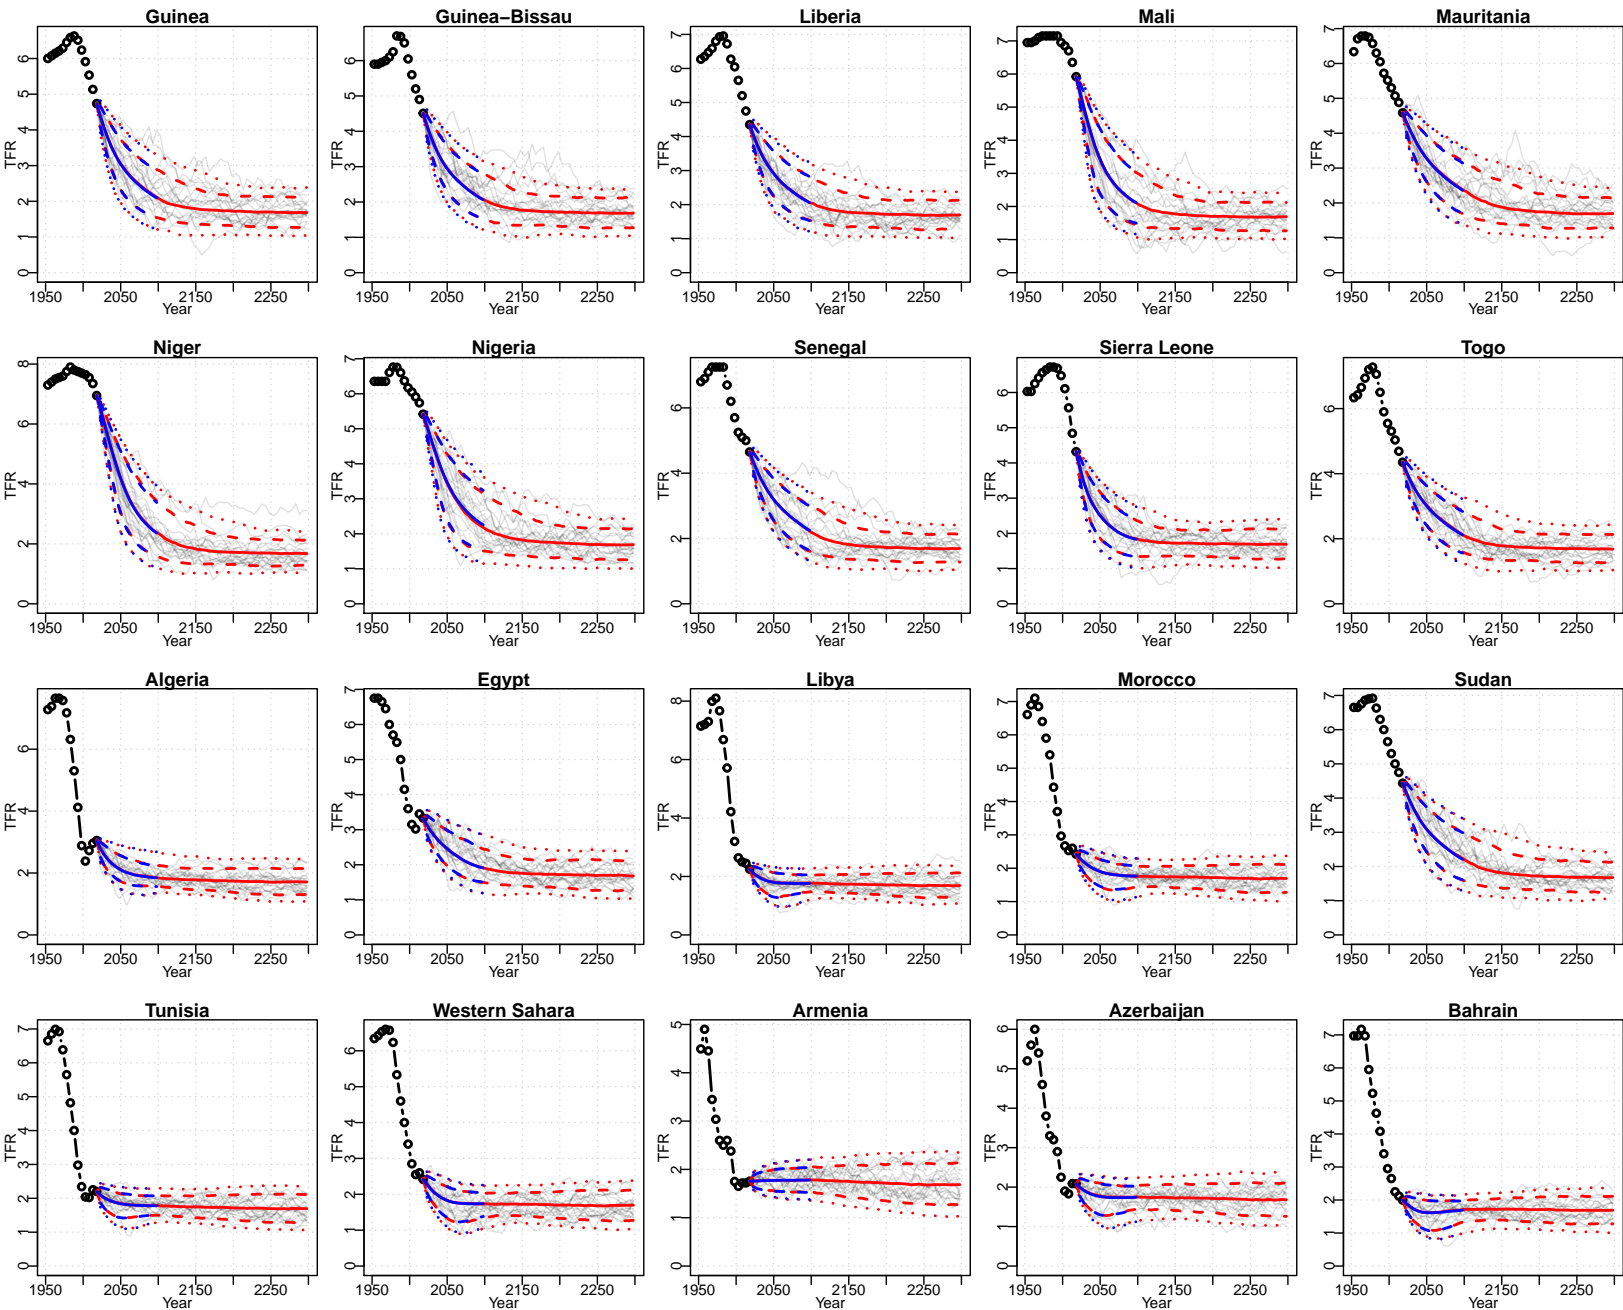

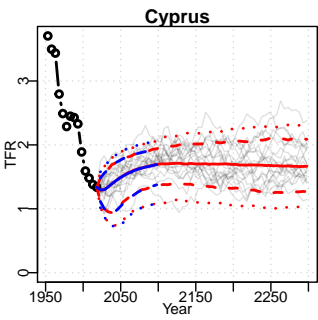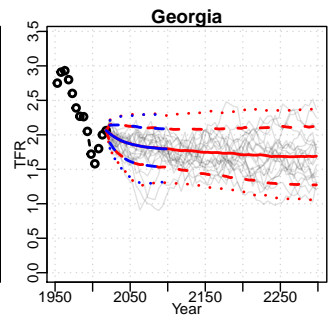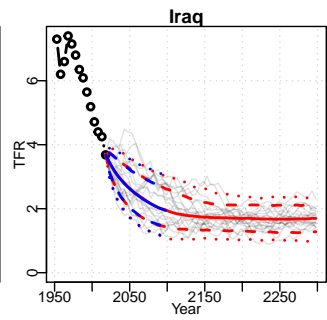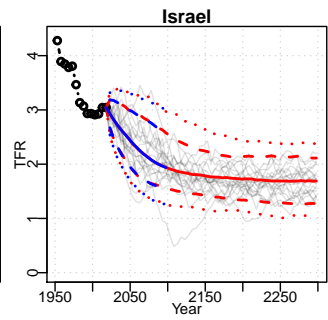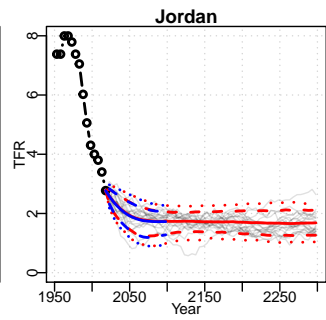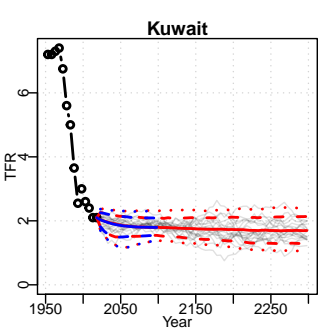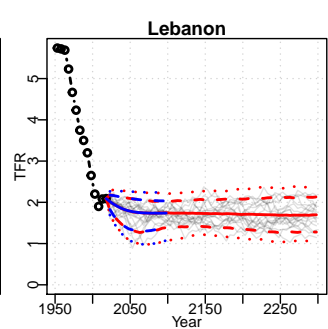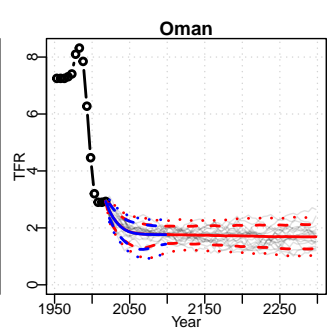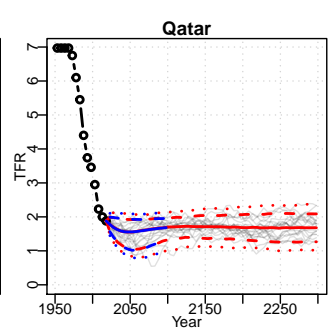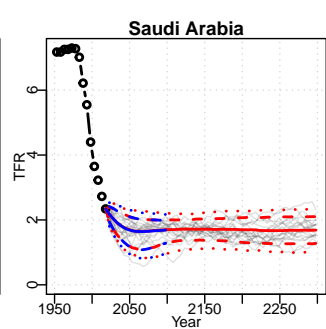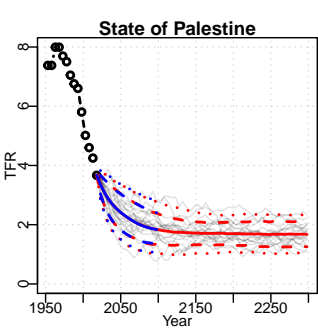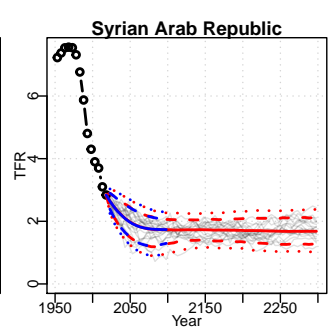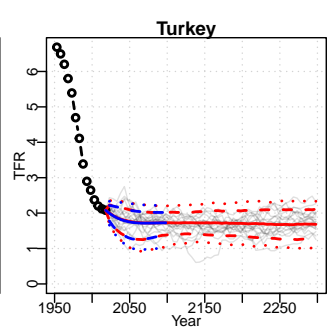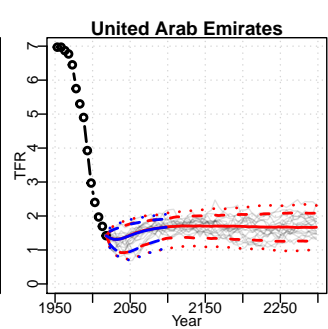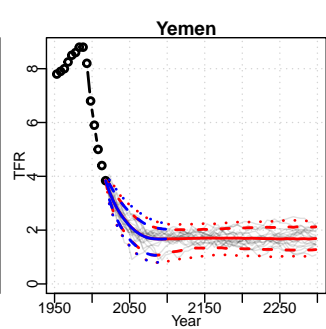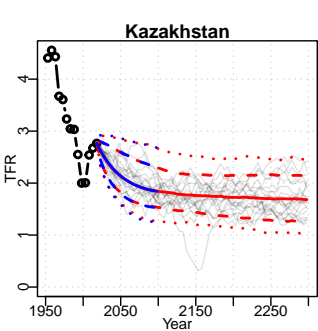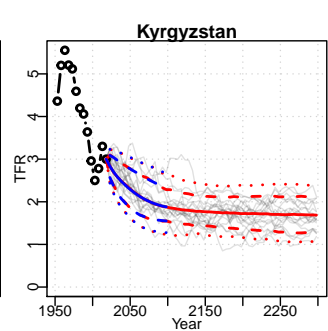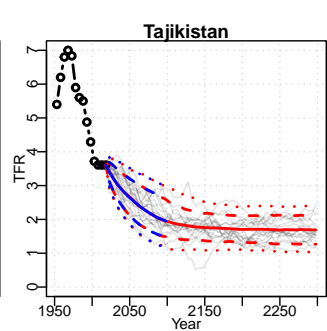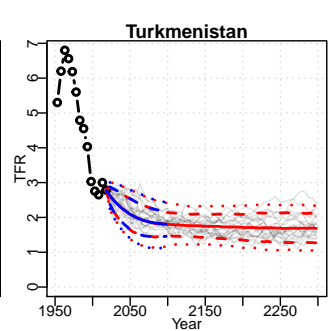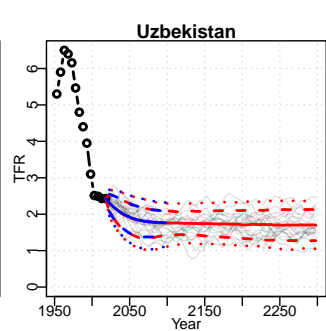

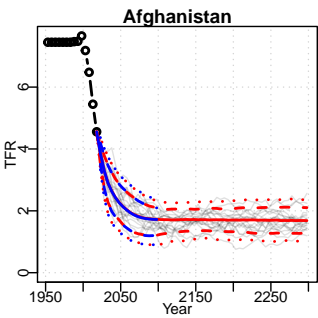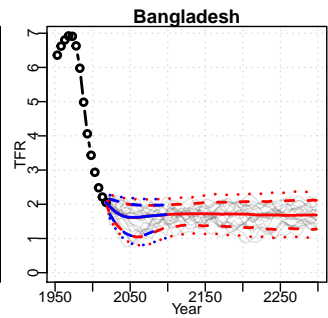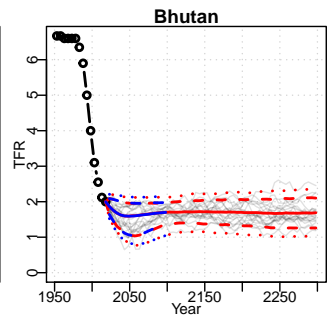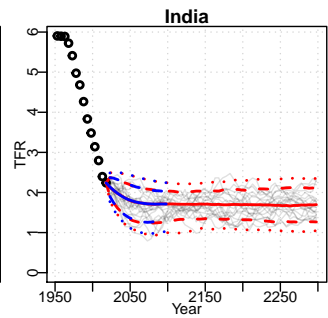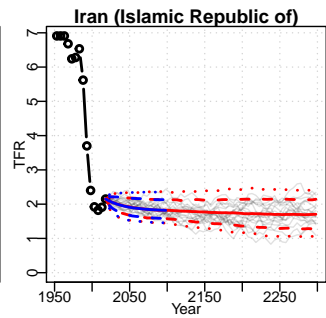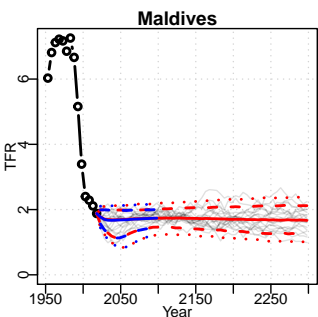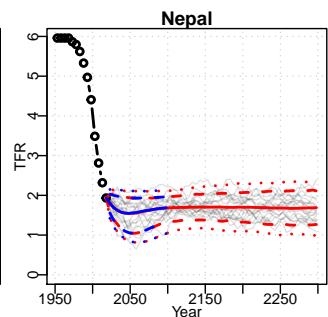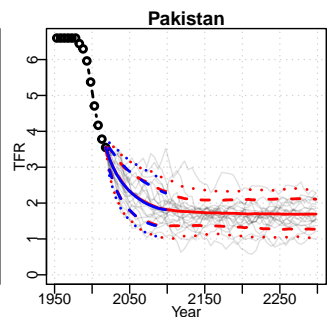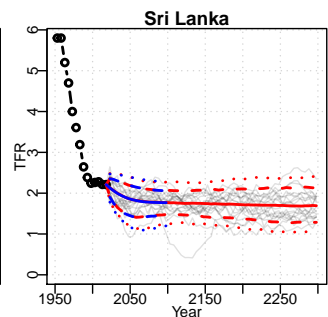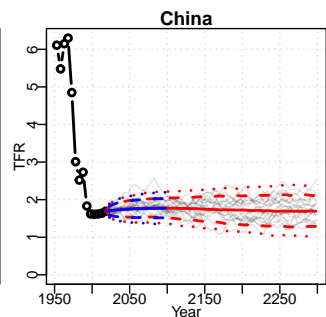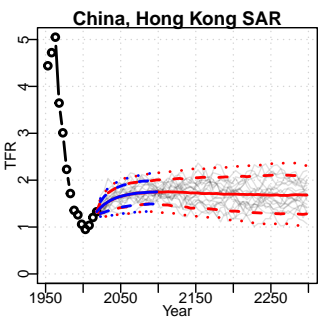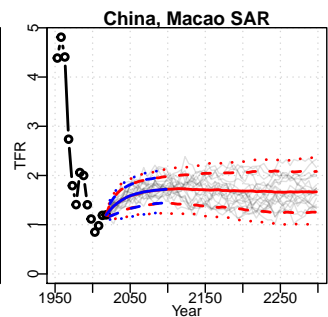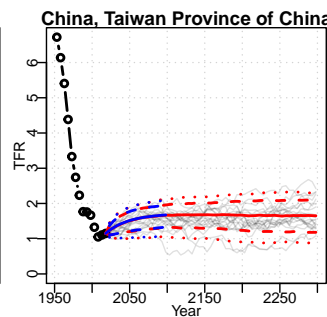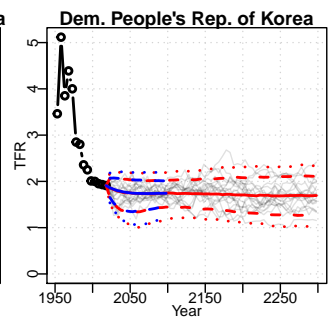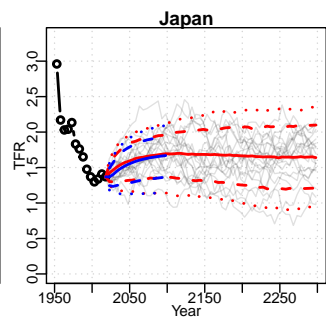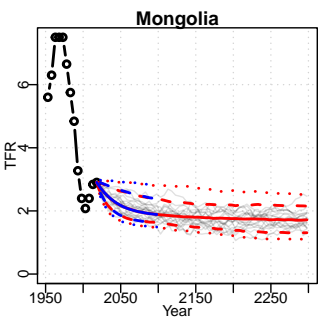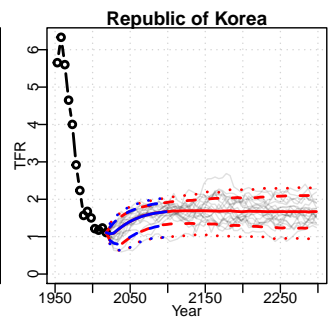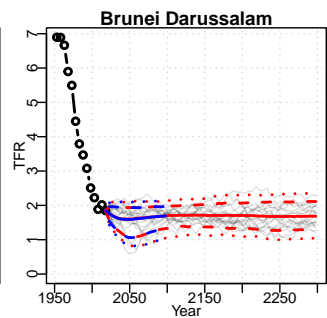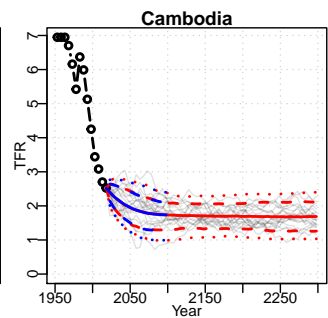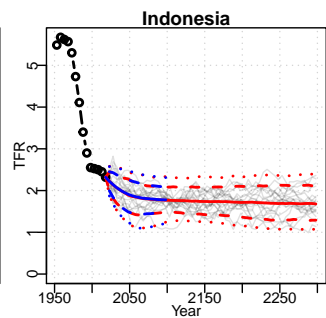



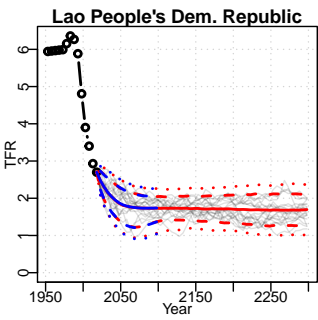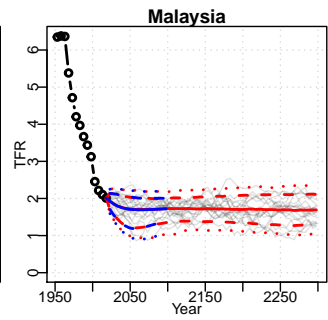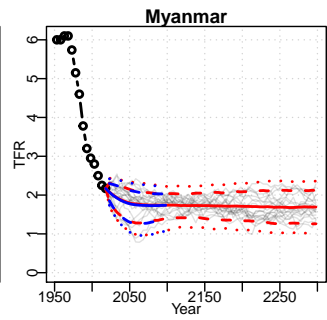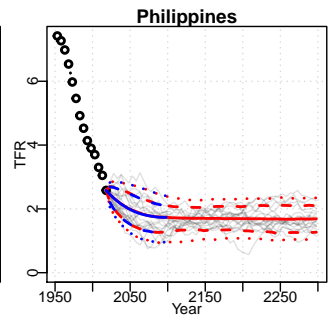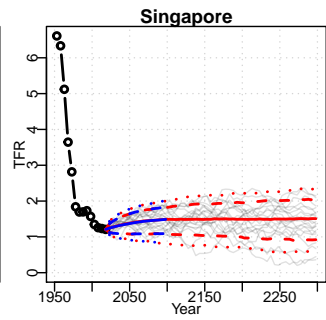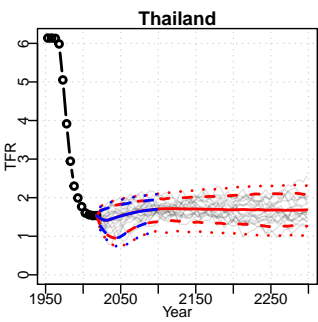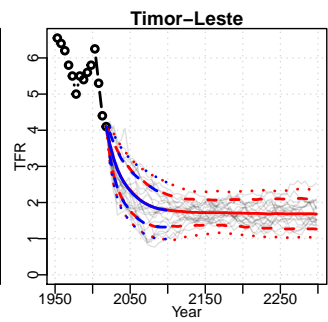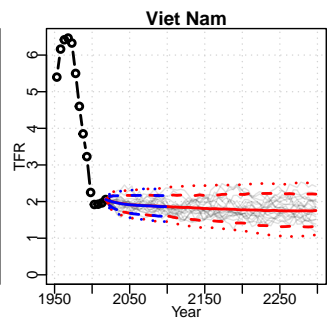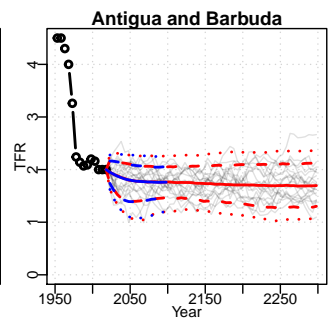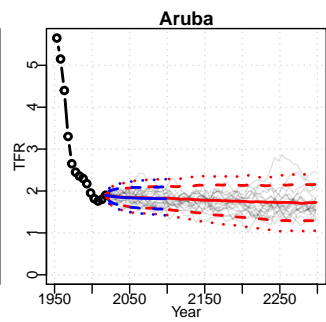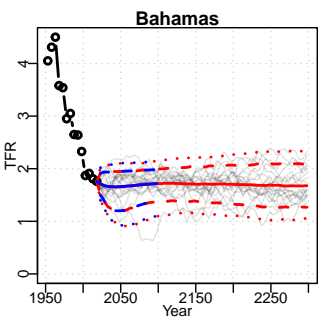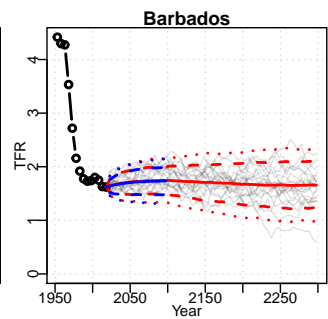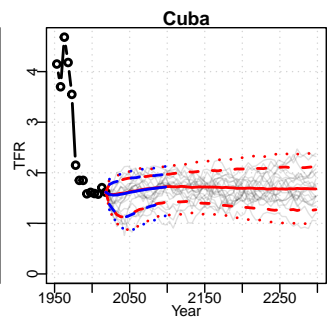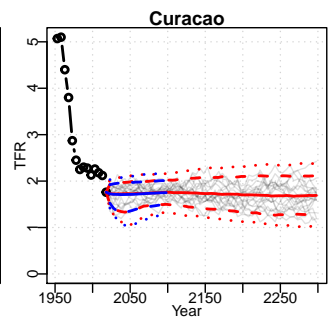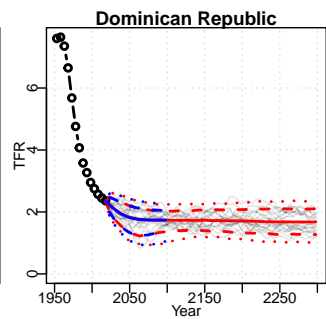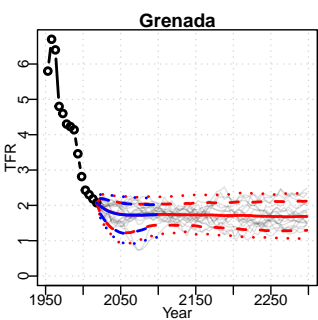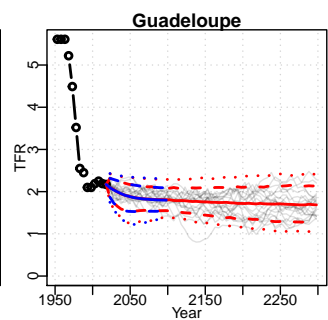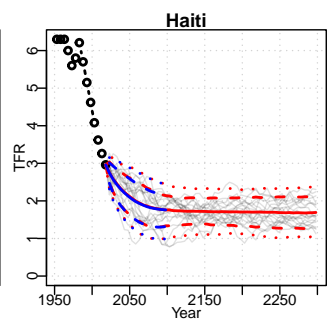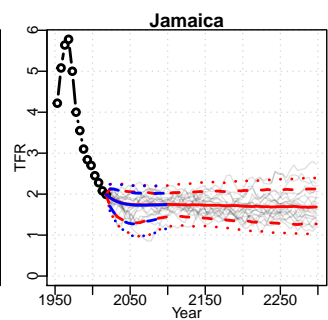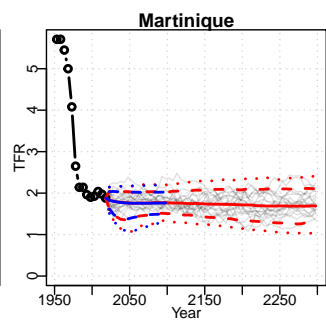



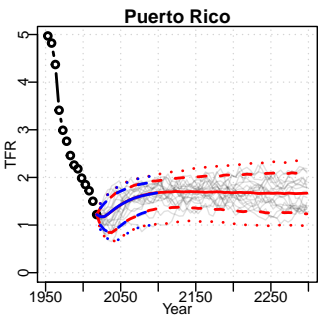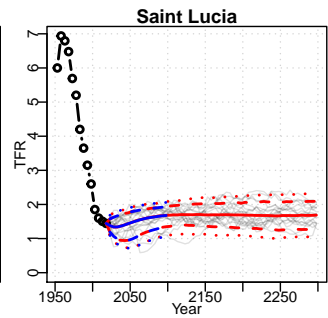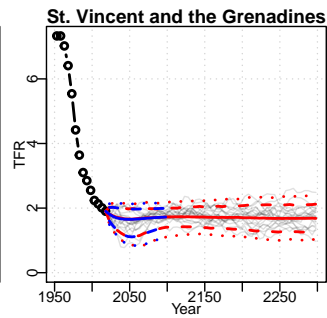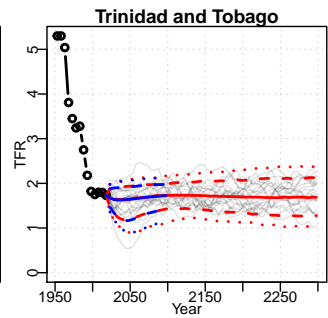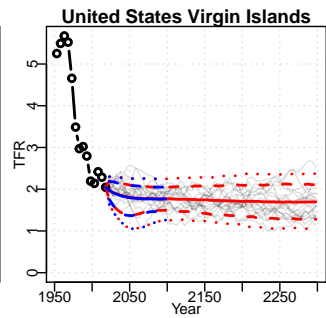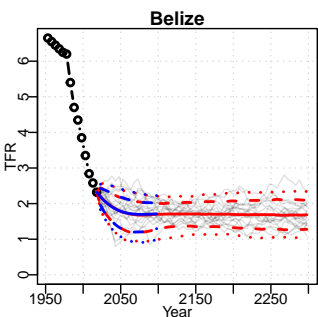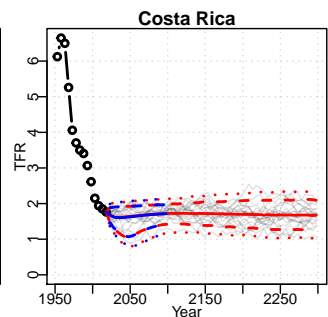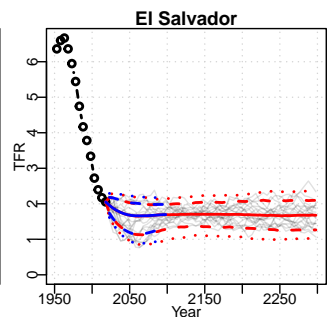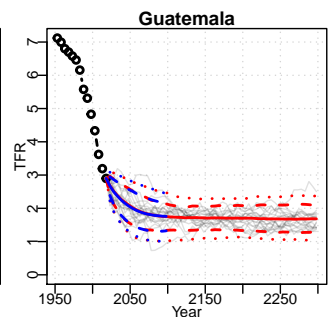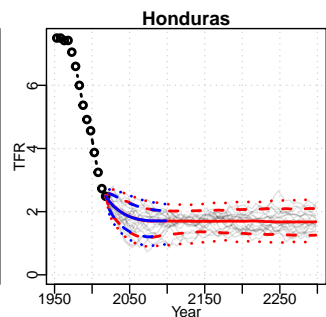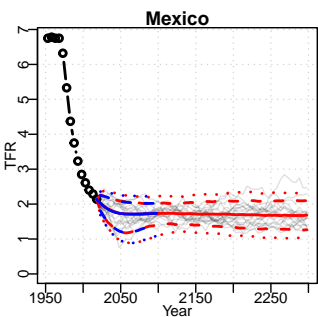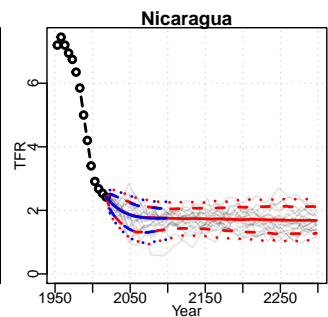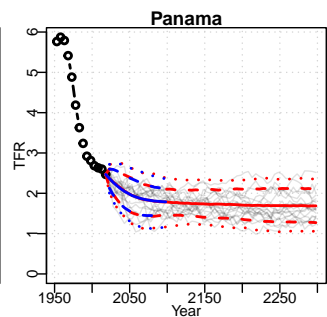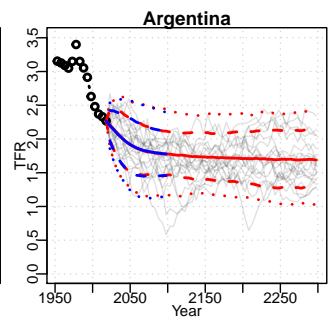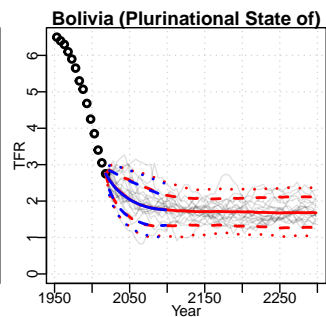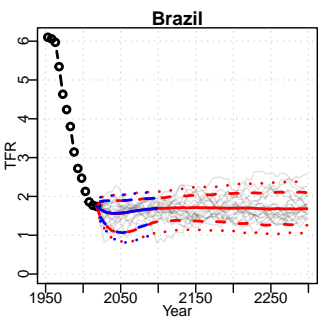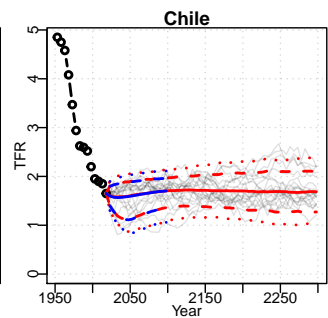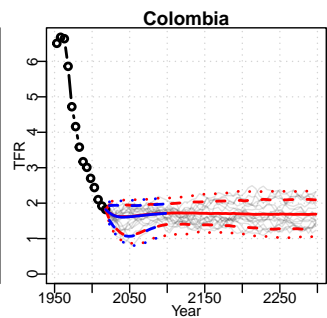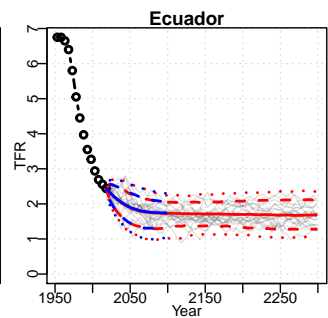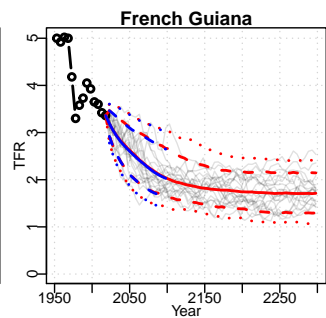

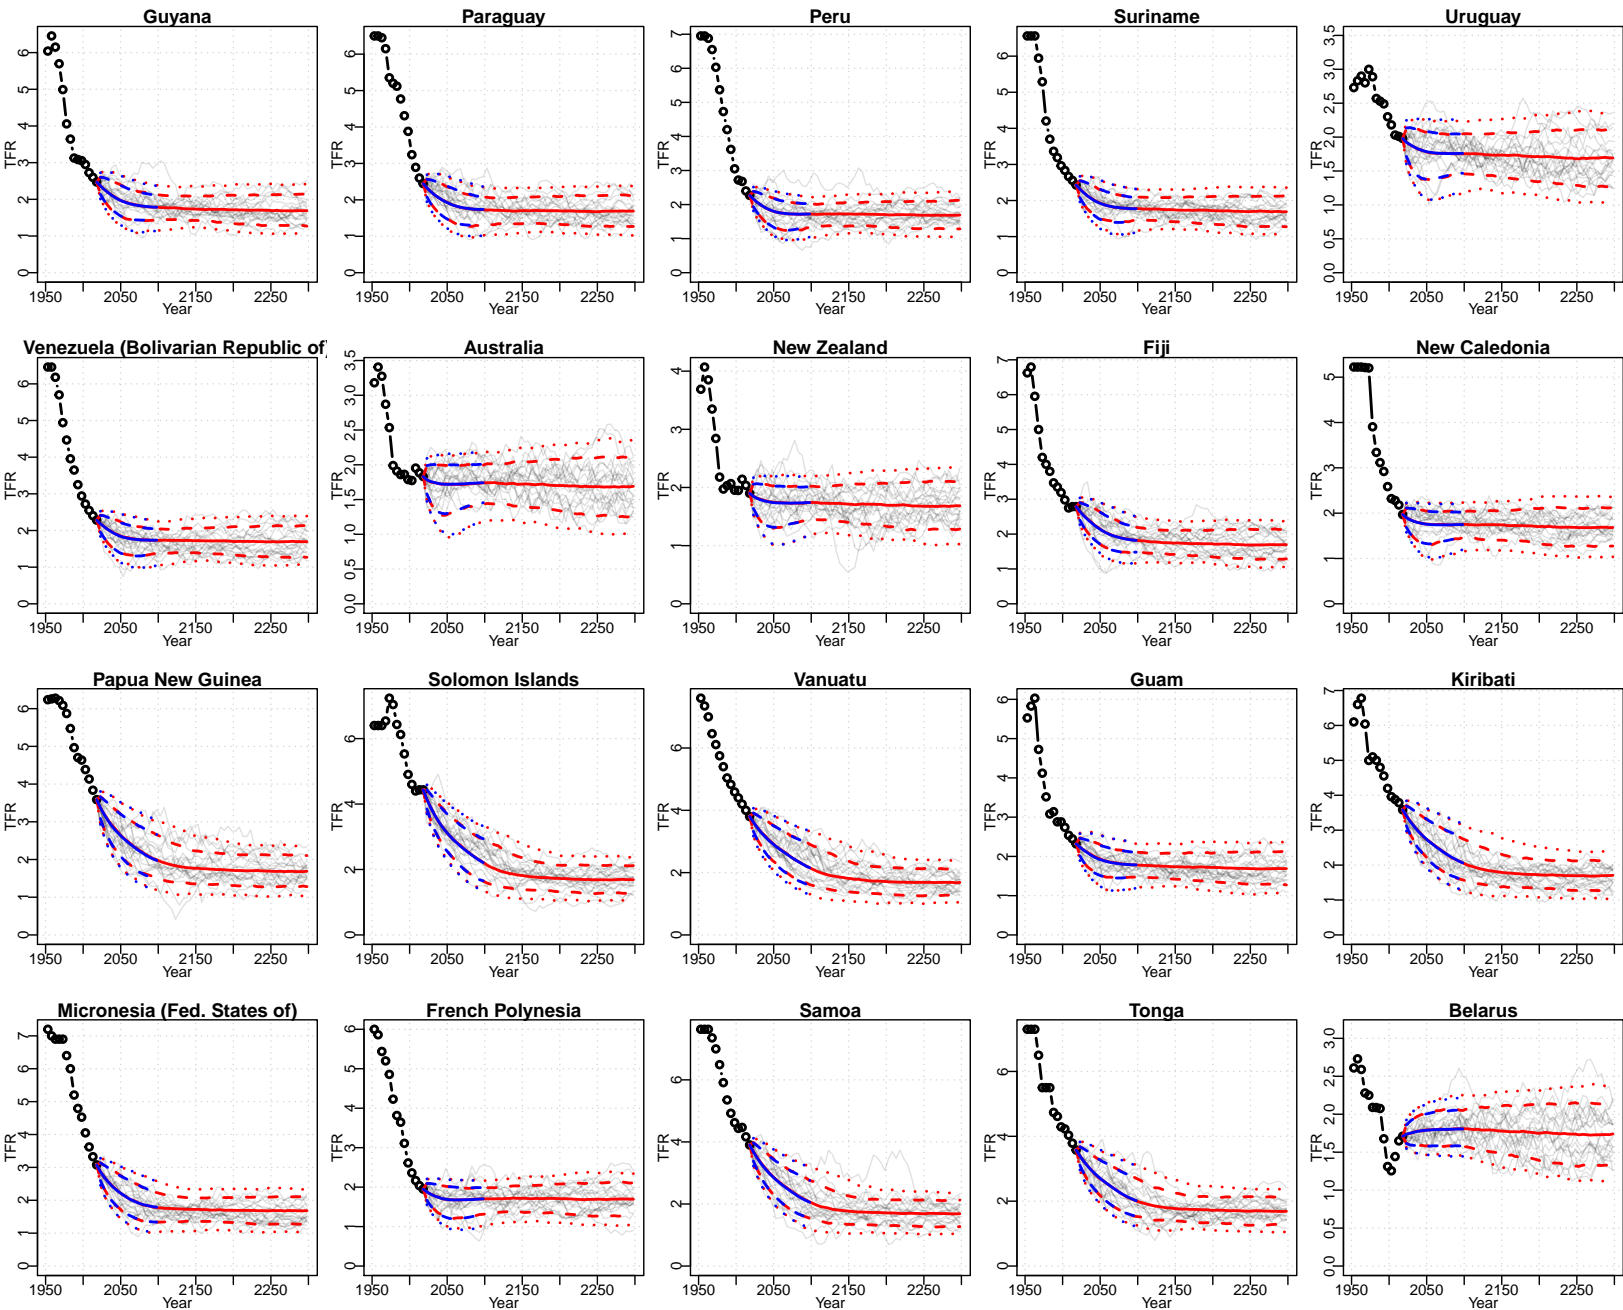

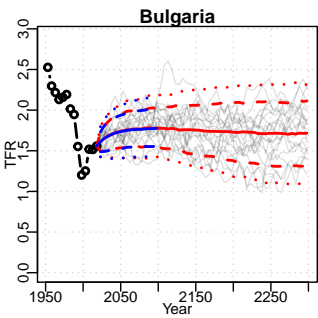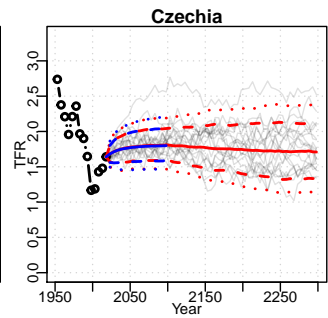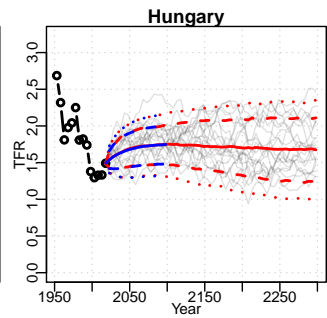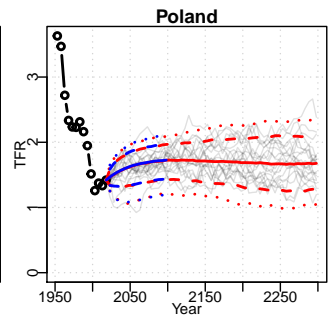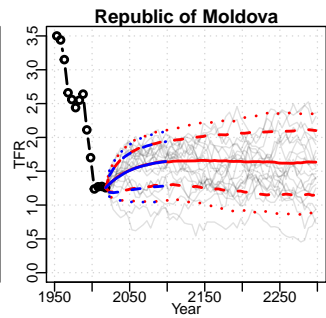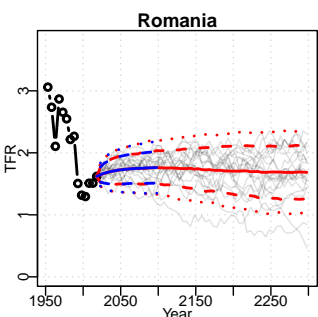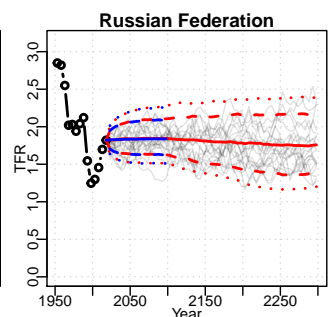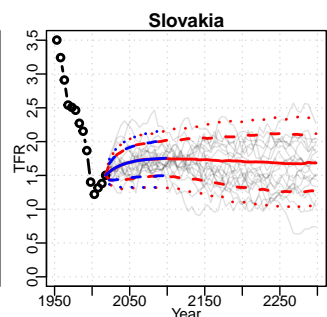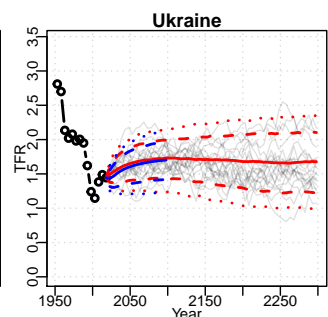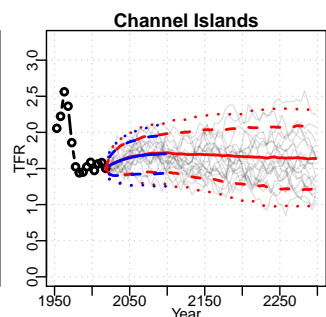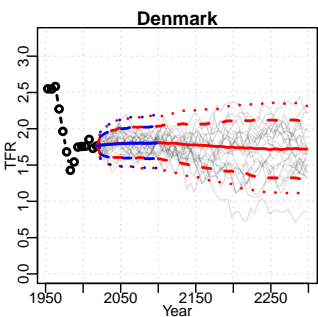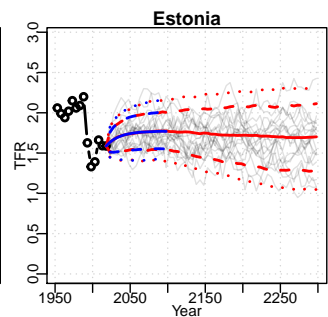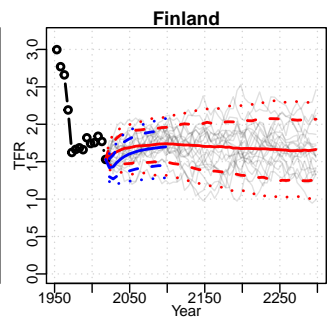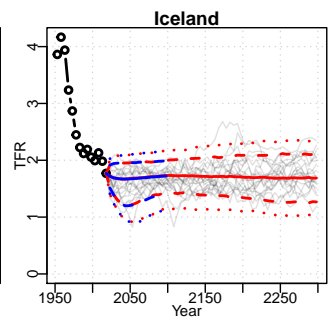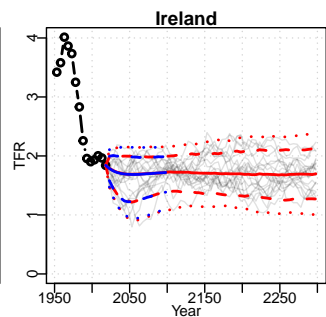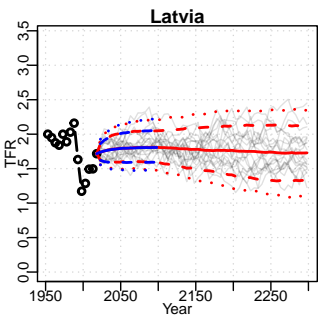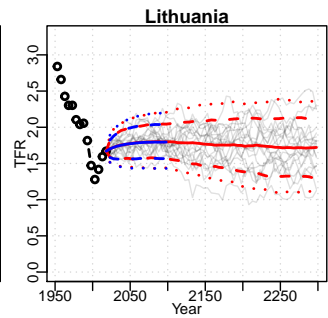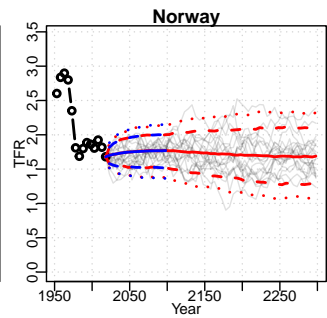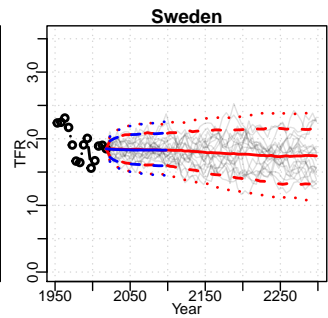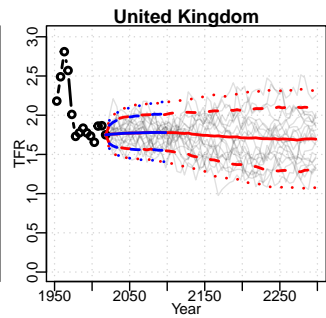

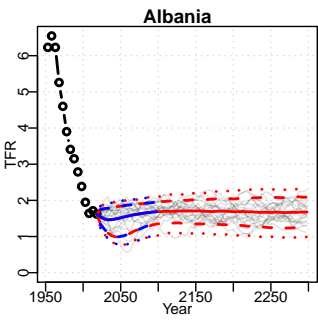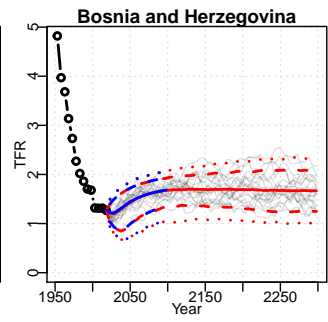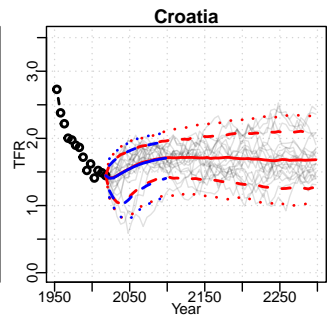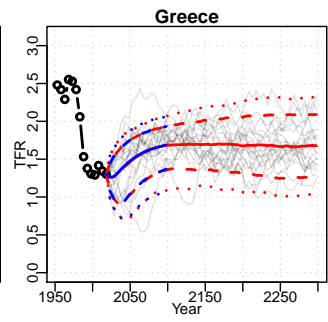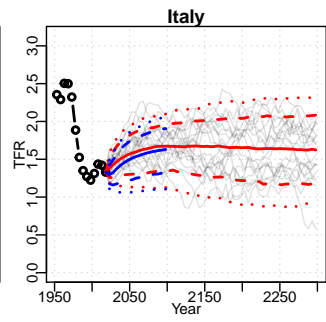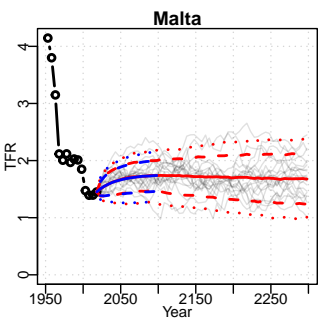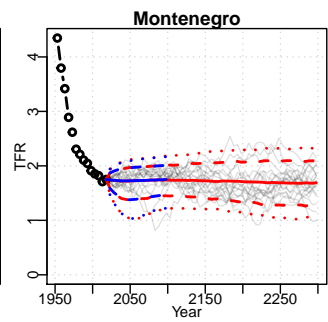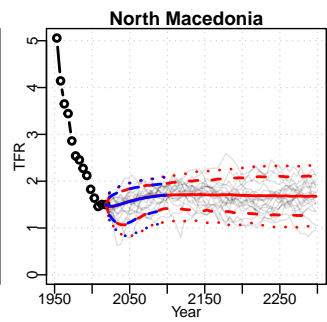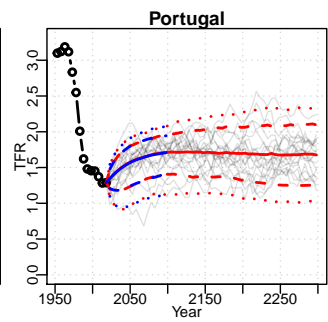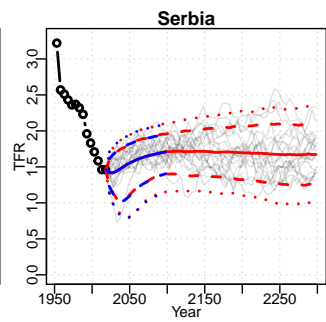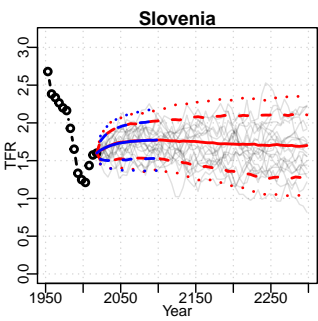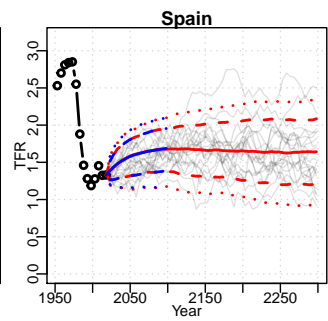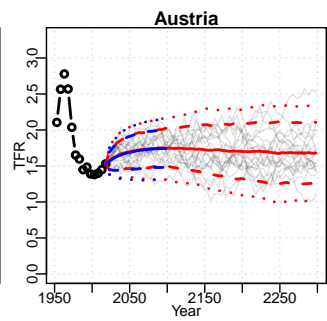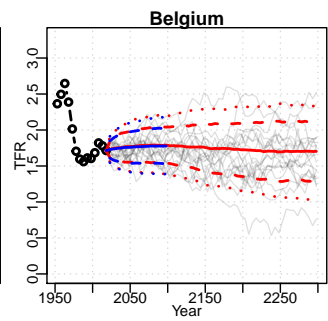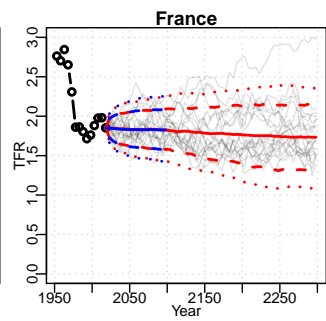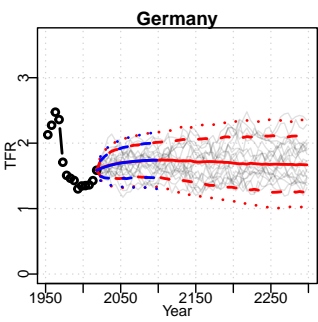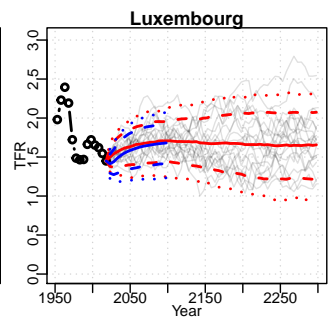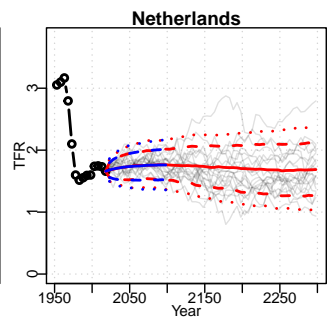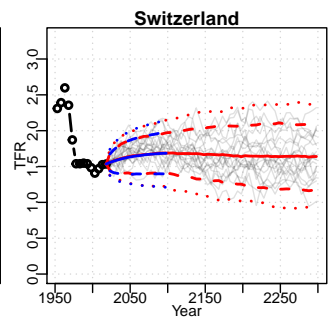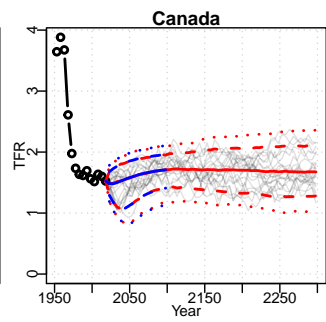

United States of America

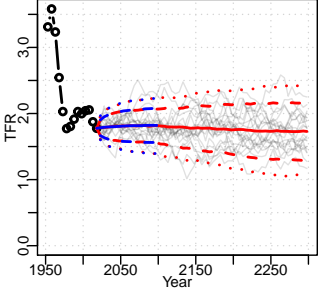

## B Life expectancy at birth for all countries



Red: long-term projections Blue: WPP 2019 Pl: Solid - median Dashed - 80% Dotted - 95%

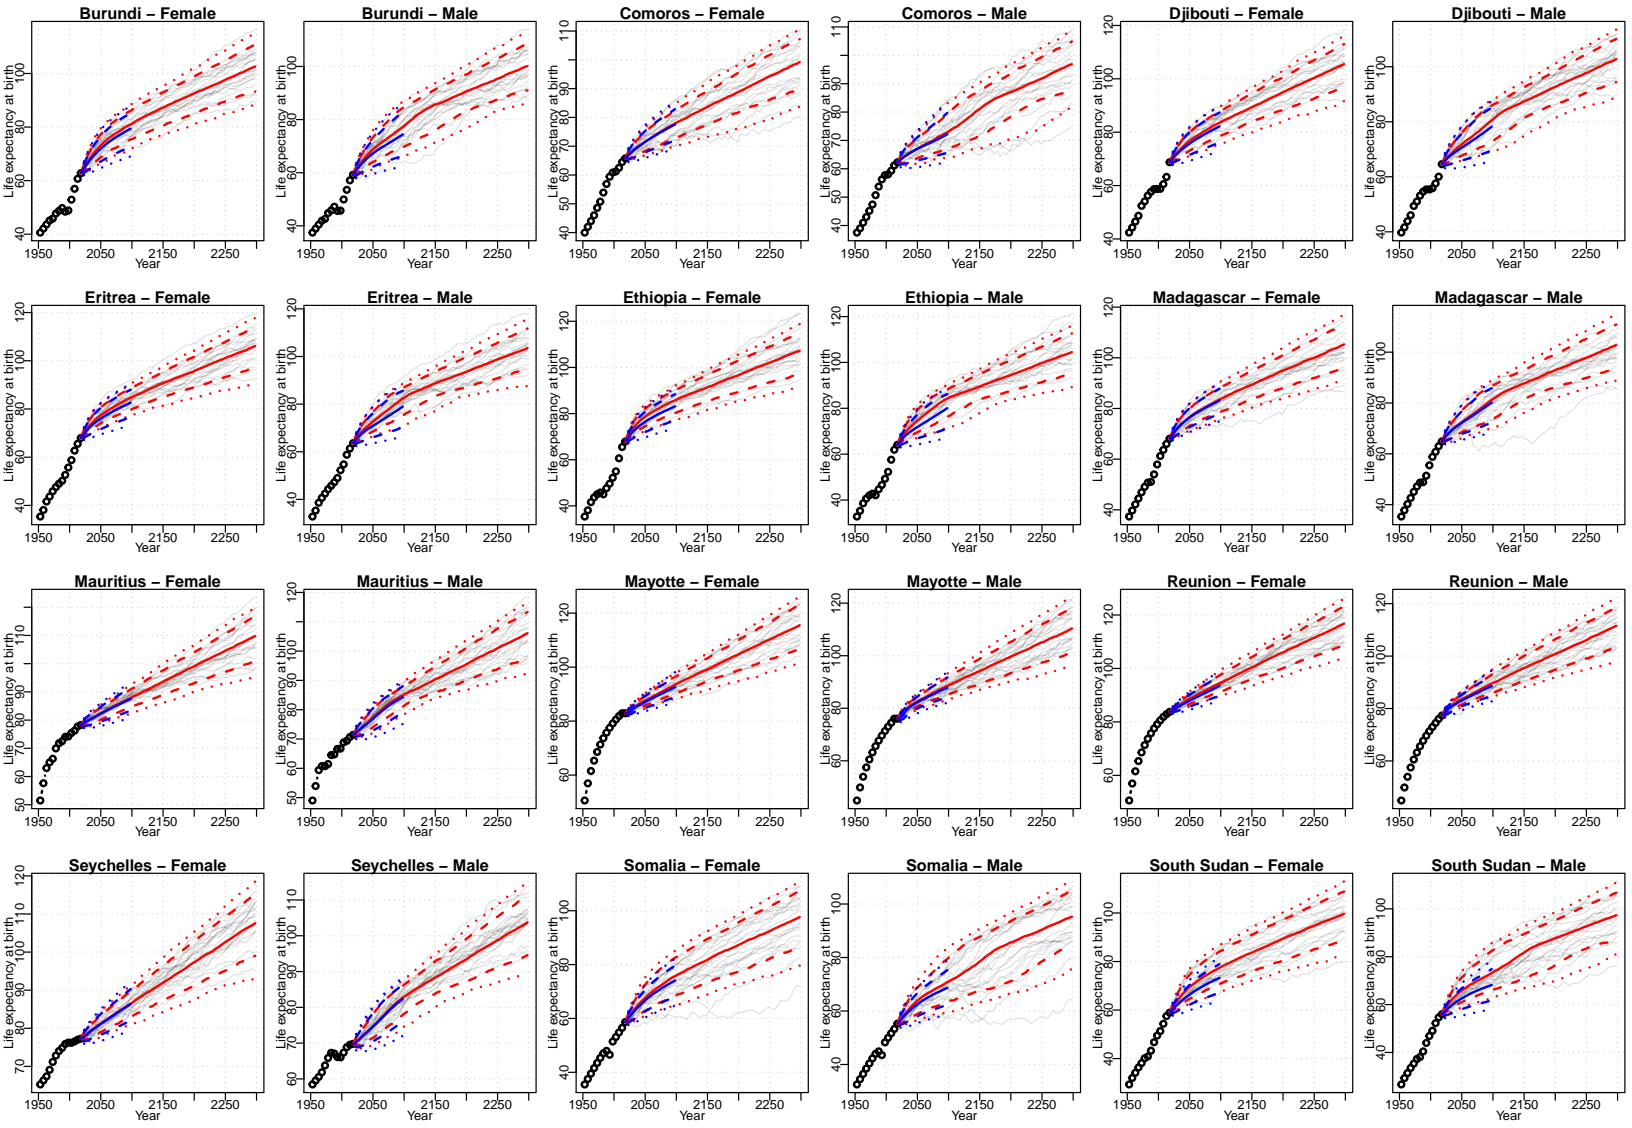



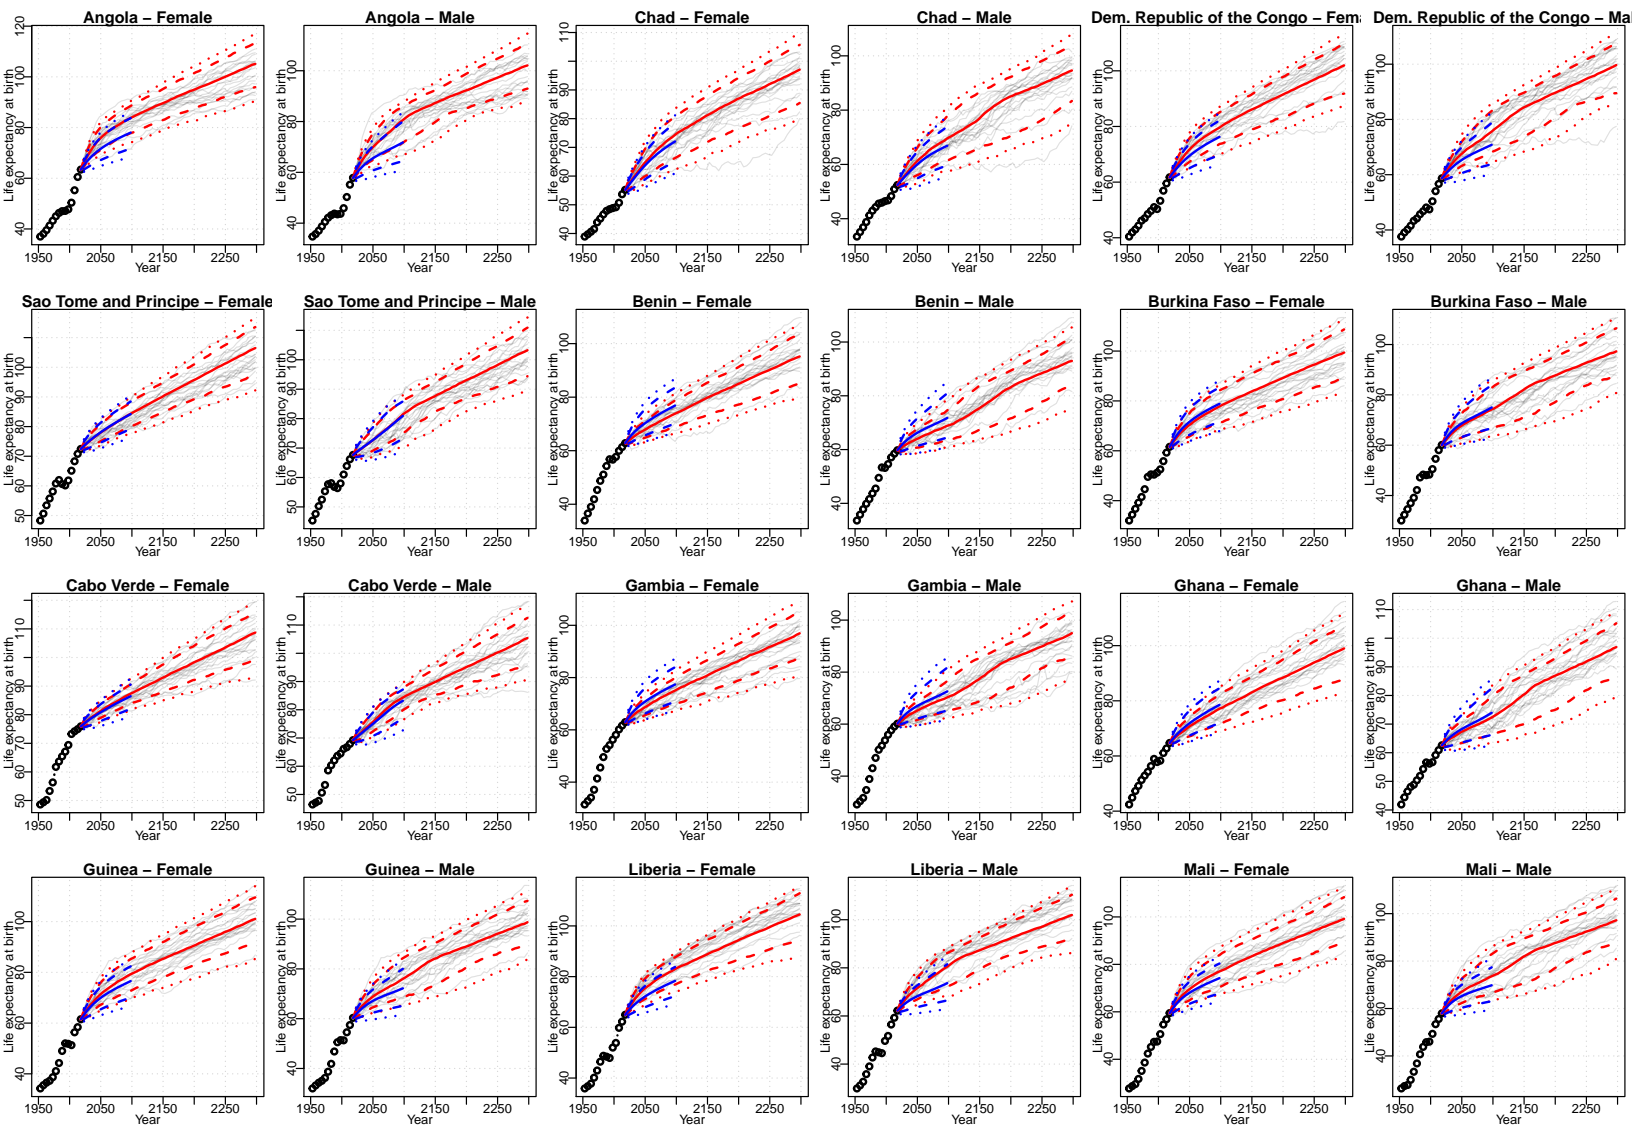

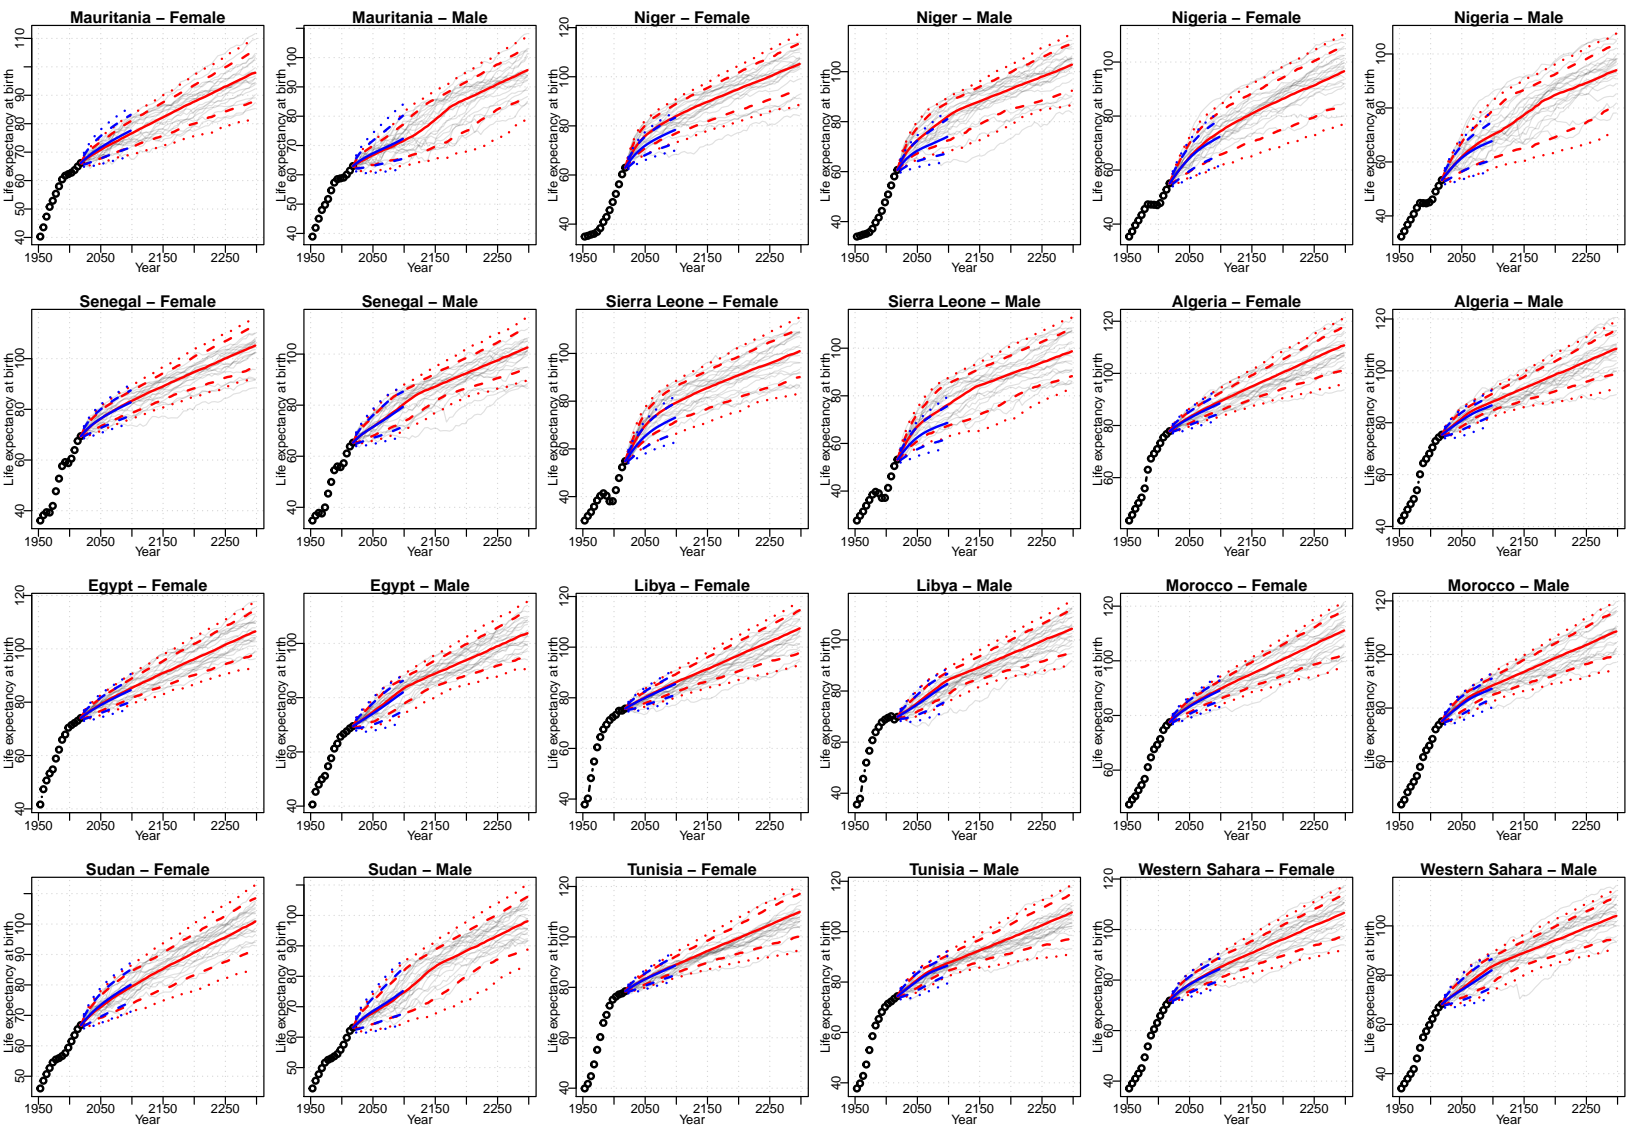

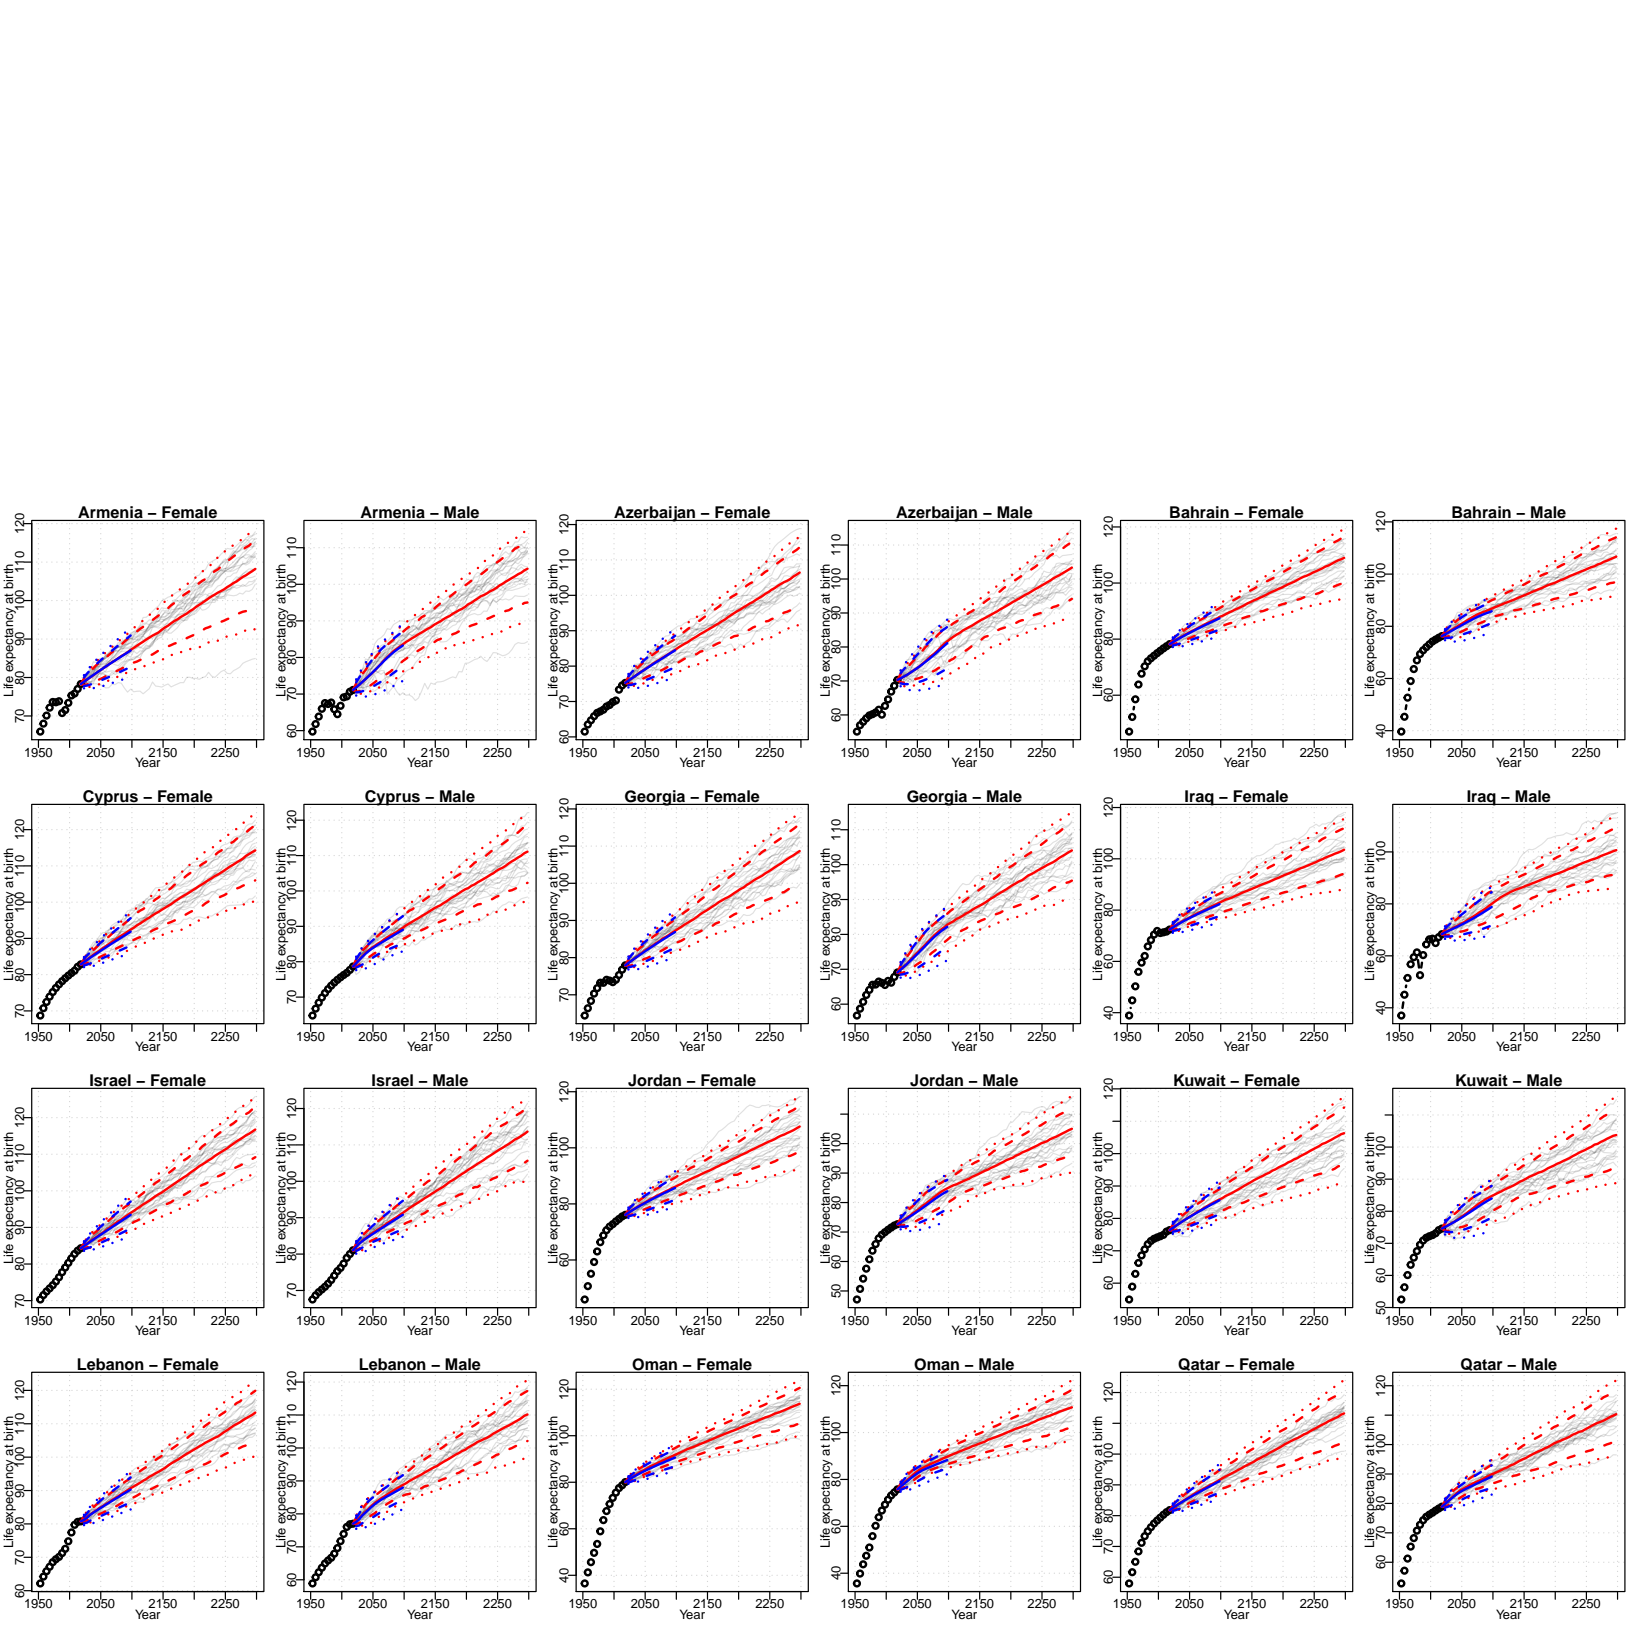

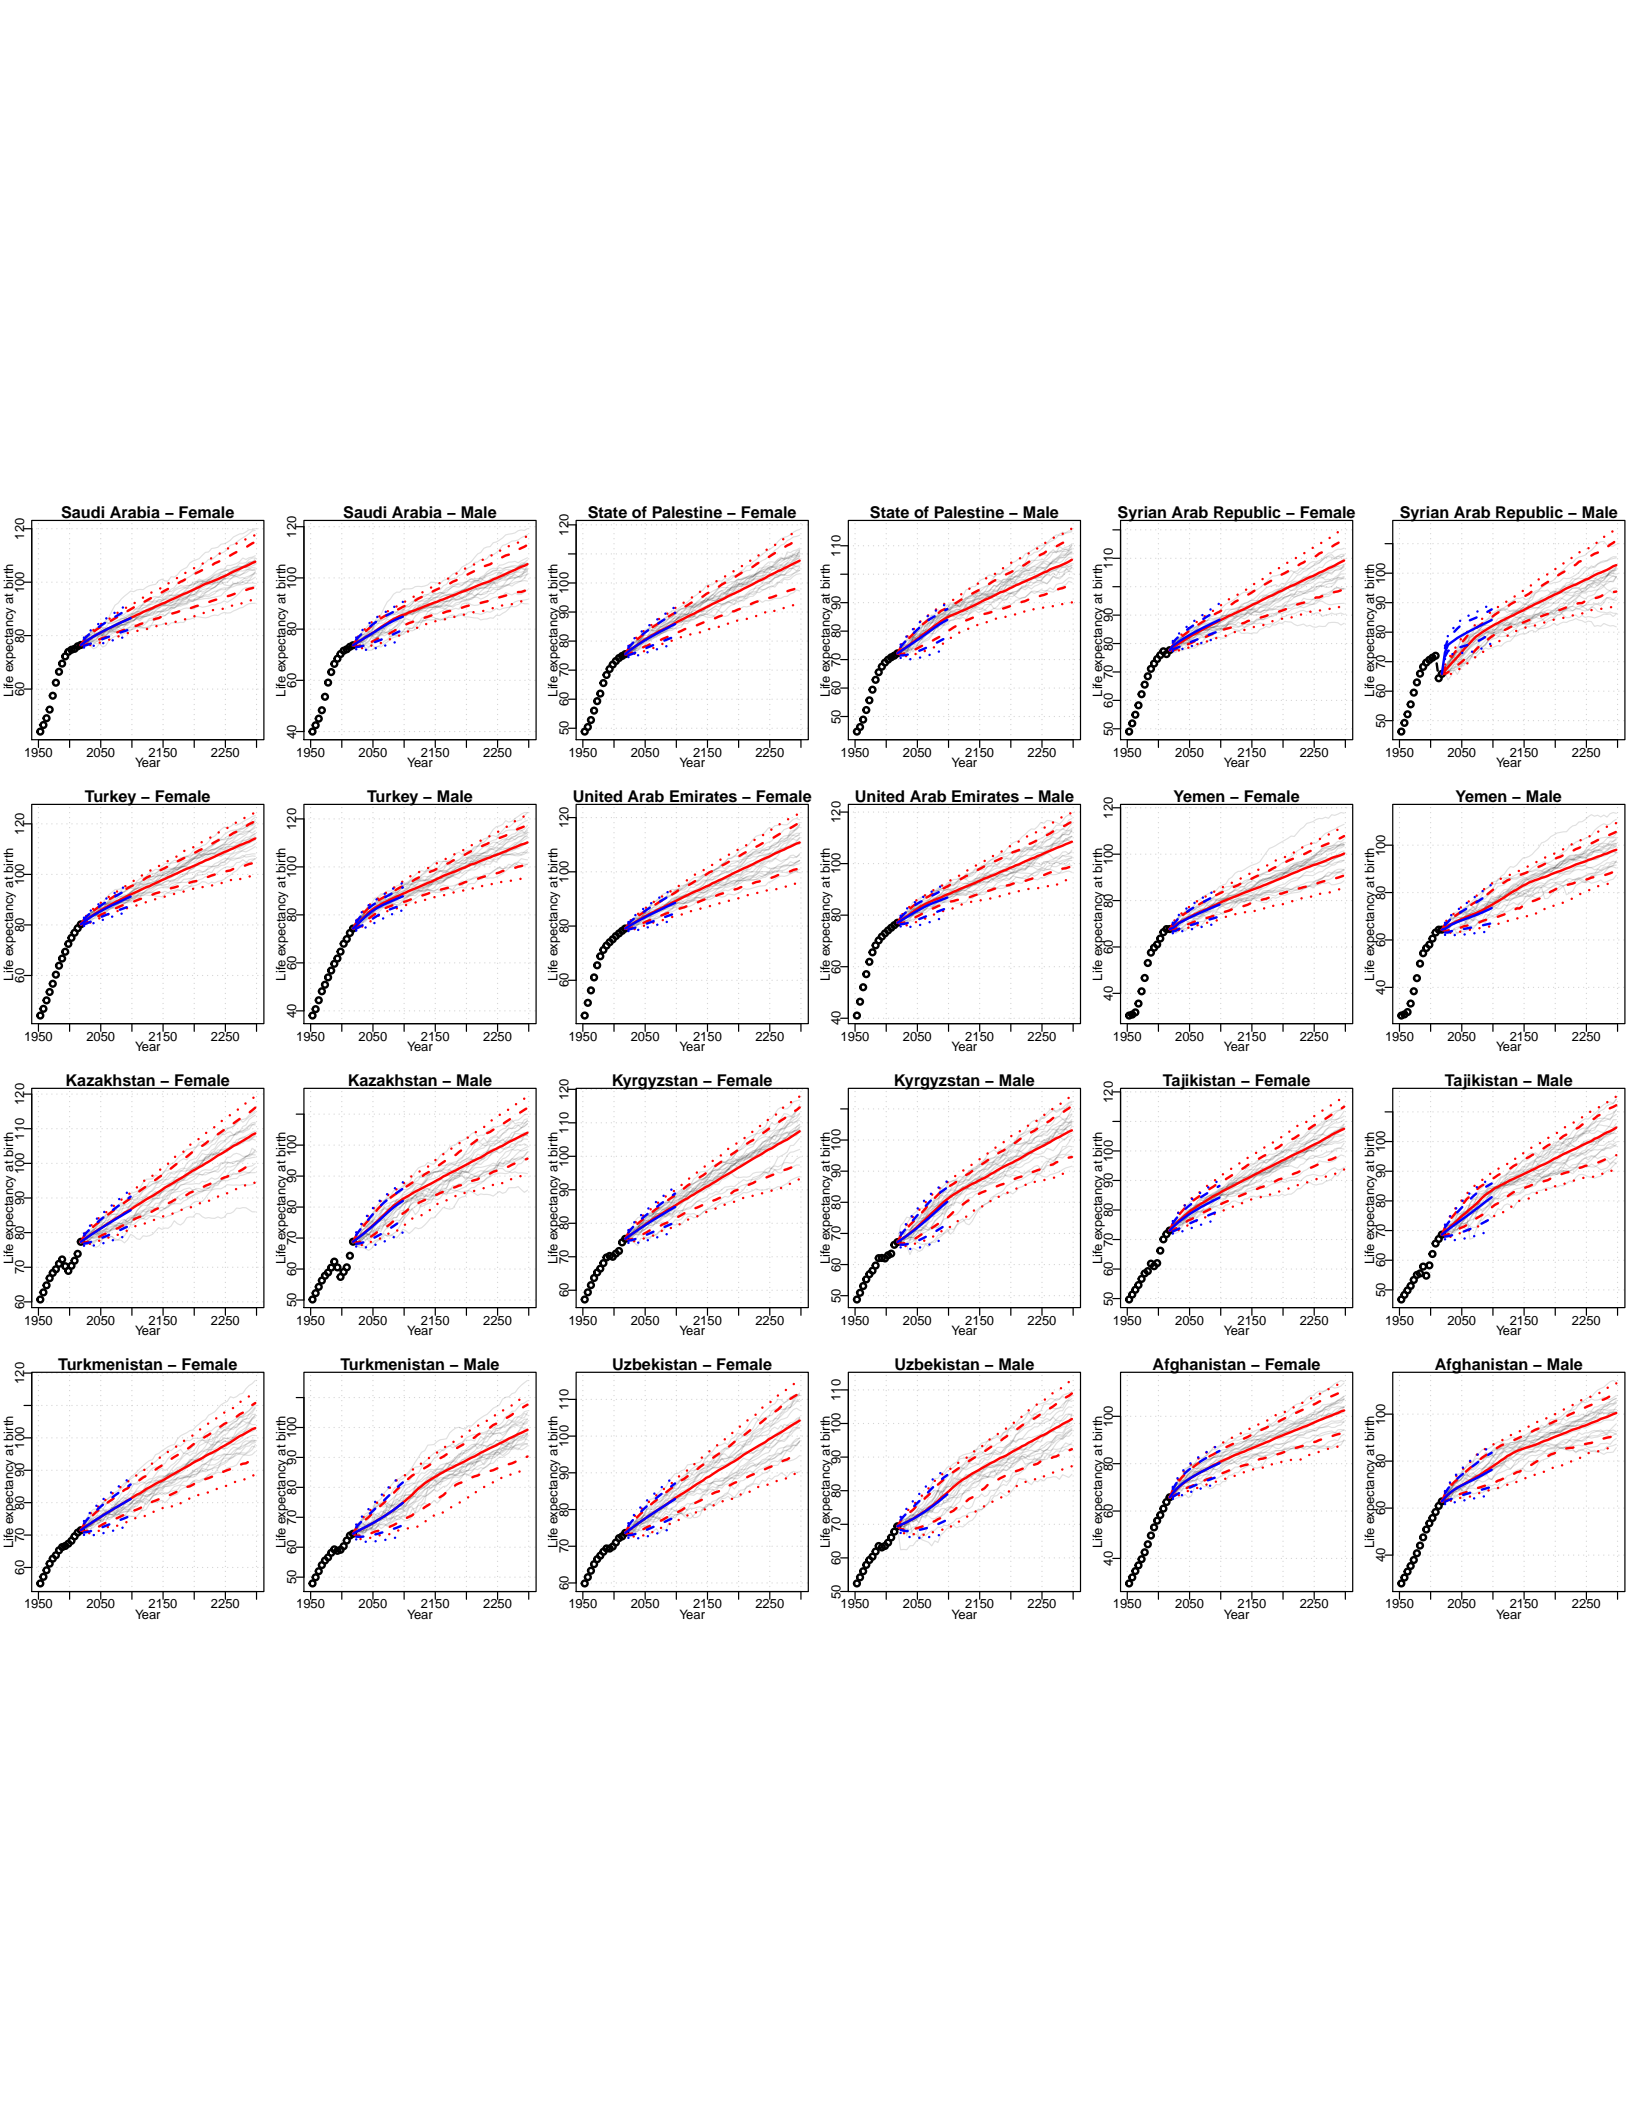

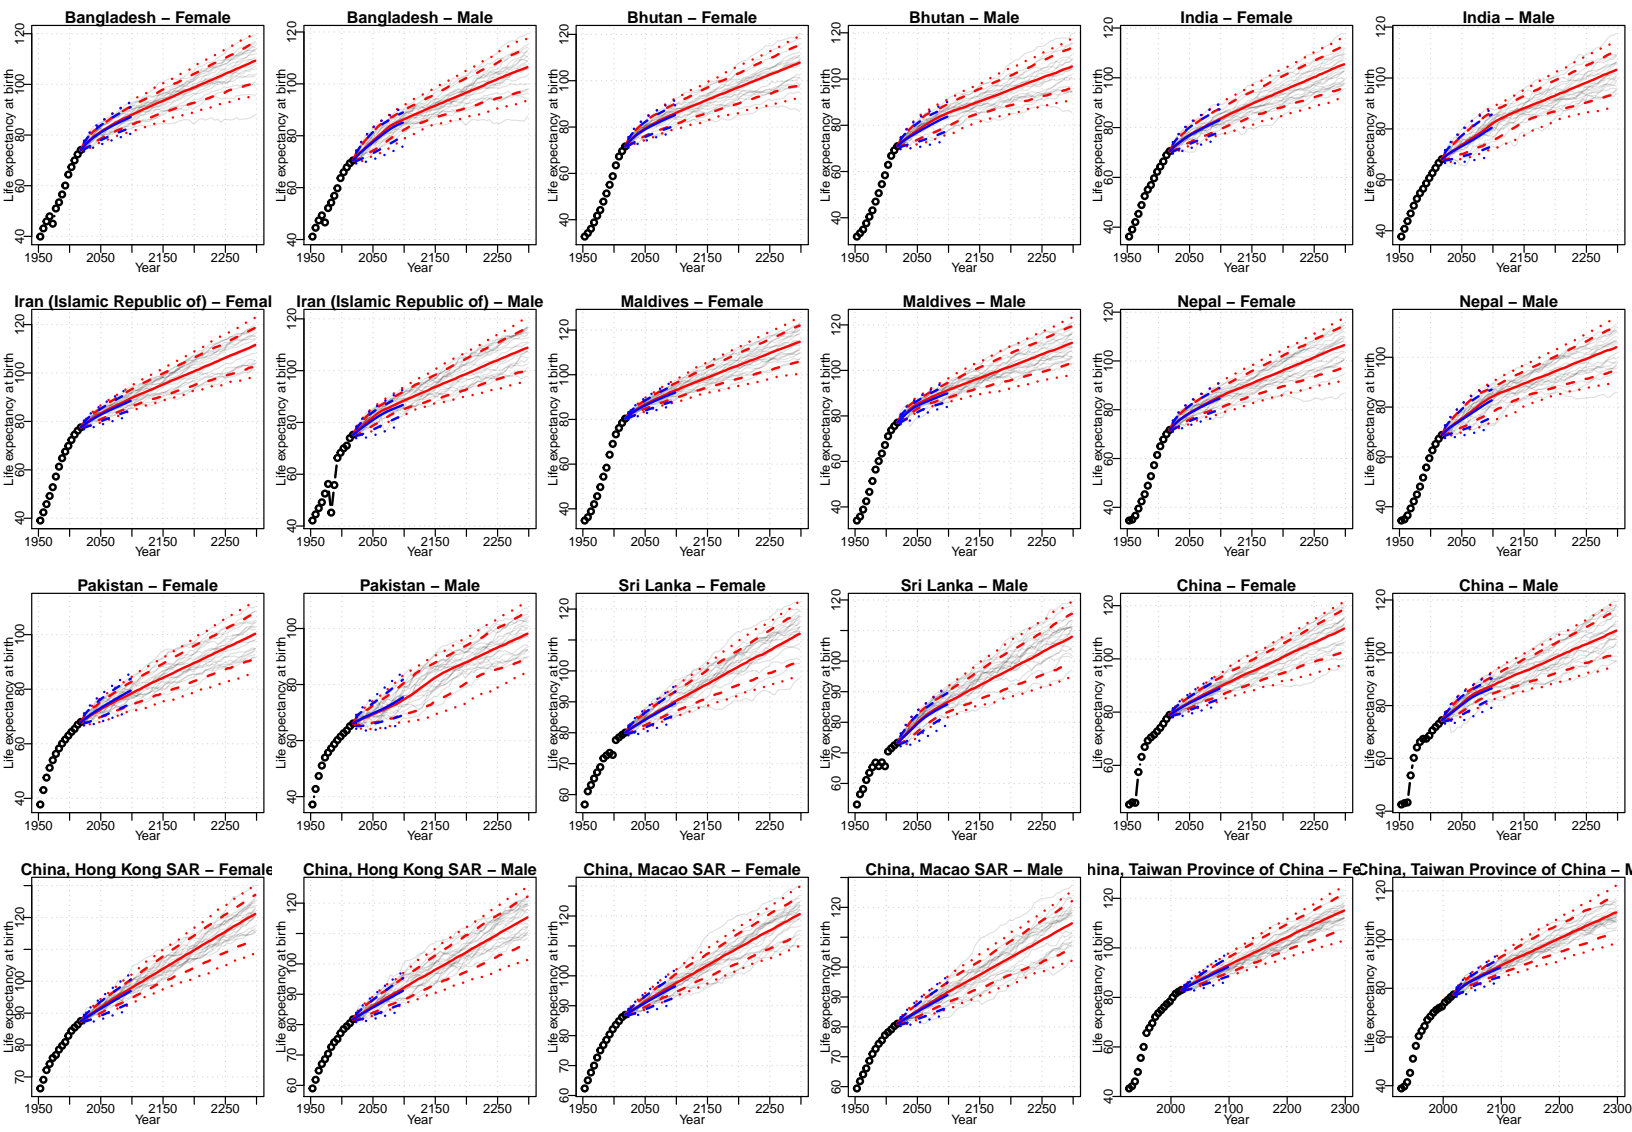



Dem. People's Rep. of Korea – Fem

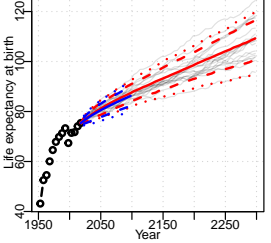

Dem. People's Rep. of Korea – Ma

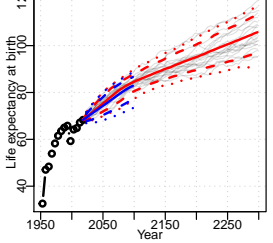

Japan – Female

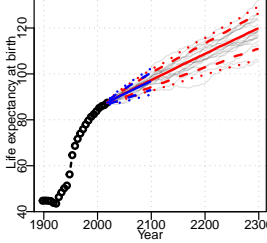

Japan – Male

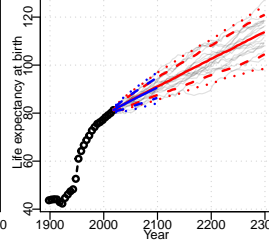

Mongolia – Female

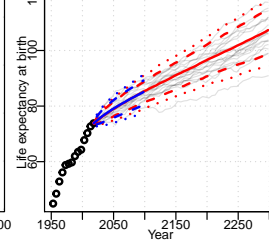

Mongolia – Male

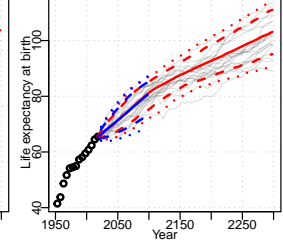

Republic of Korea – Female

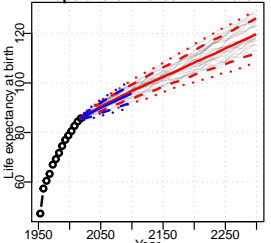

Republic of Korea – Male

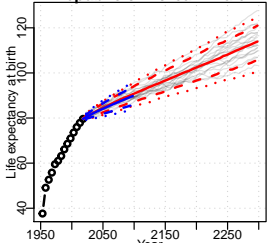

Brunei Darussalam – Female

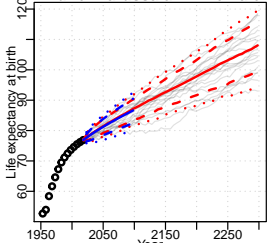

Brunei Darussalam – Male

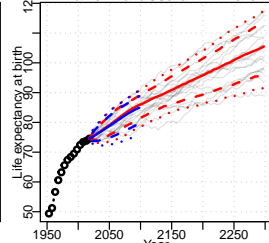

Cambodia – Female

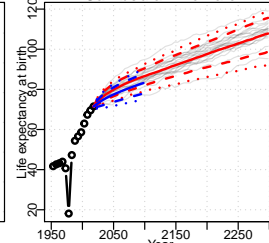

Cambodia – Male

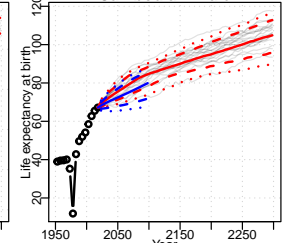

Indonesia – Female

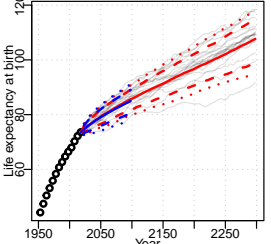

Indonesia – Male

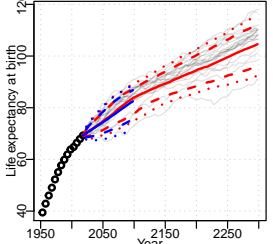

Lao People's Dem. Republic – Fem

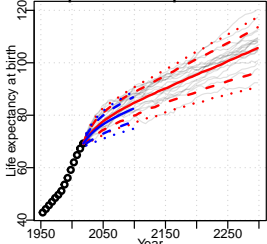

Lao People's Dem. Republic – Mal

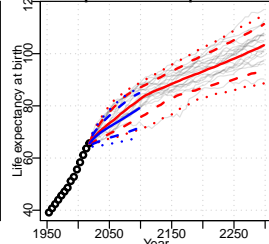

Malaysia – Female

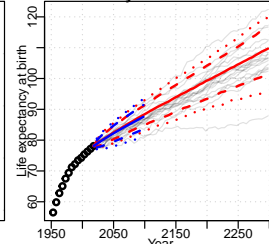

Malaysia – Male

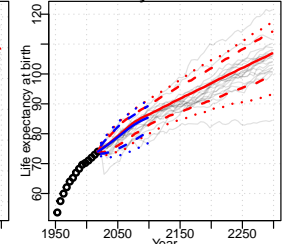

Myanmar – Female

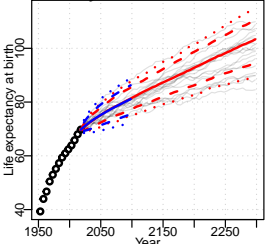

Myanmar – Male

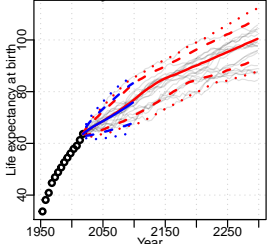

Philippines – Female

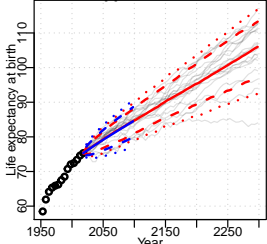

Philippines – Male

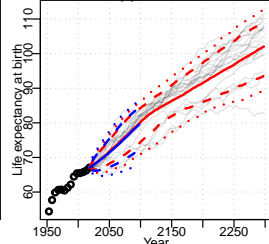

Singapore – Female

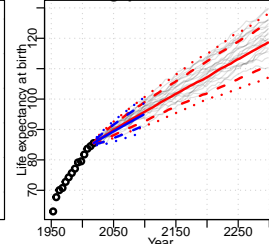

Singapore – Male

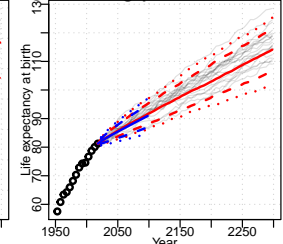

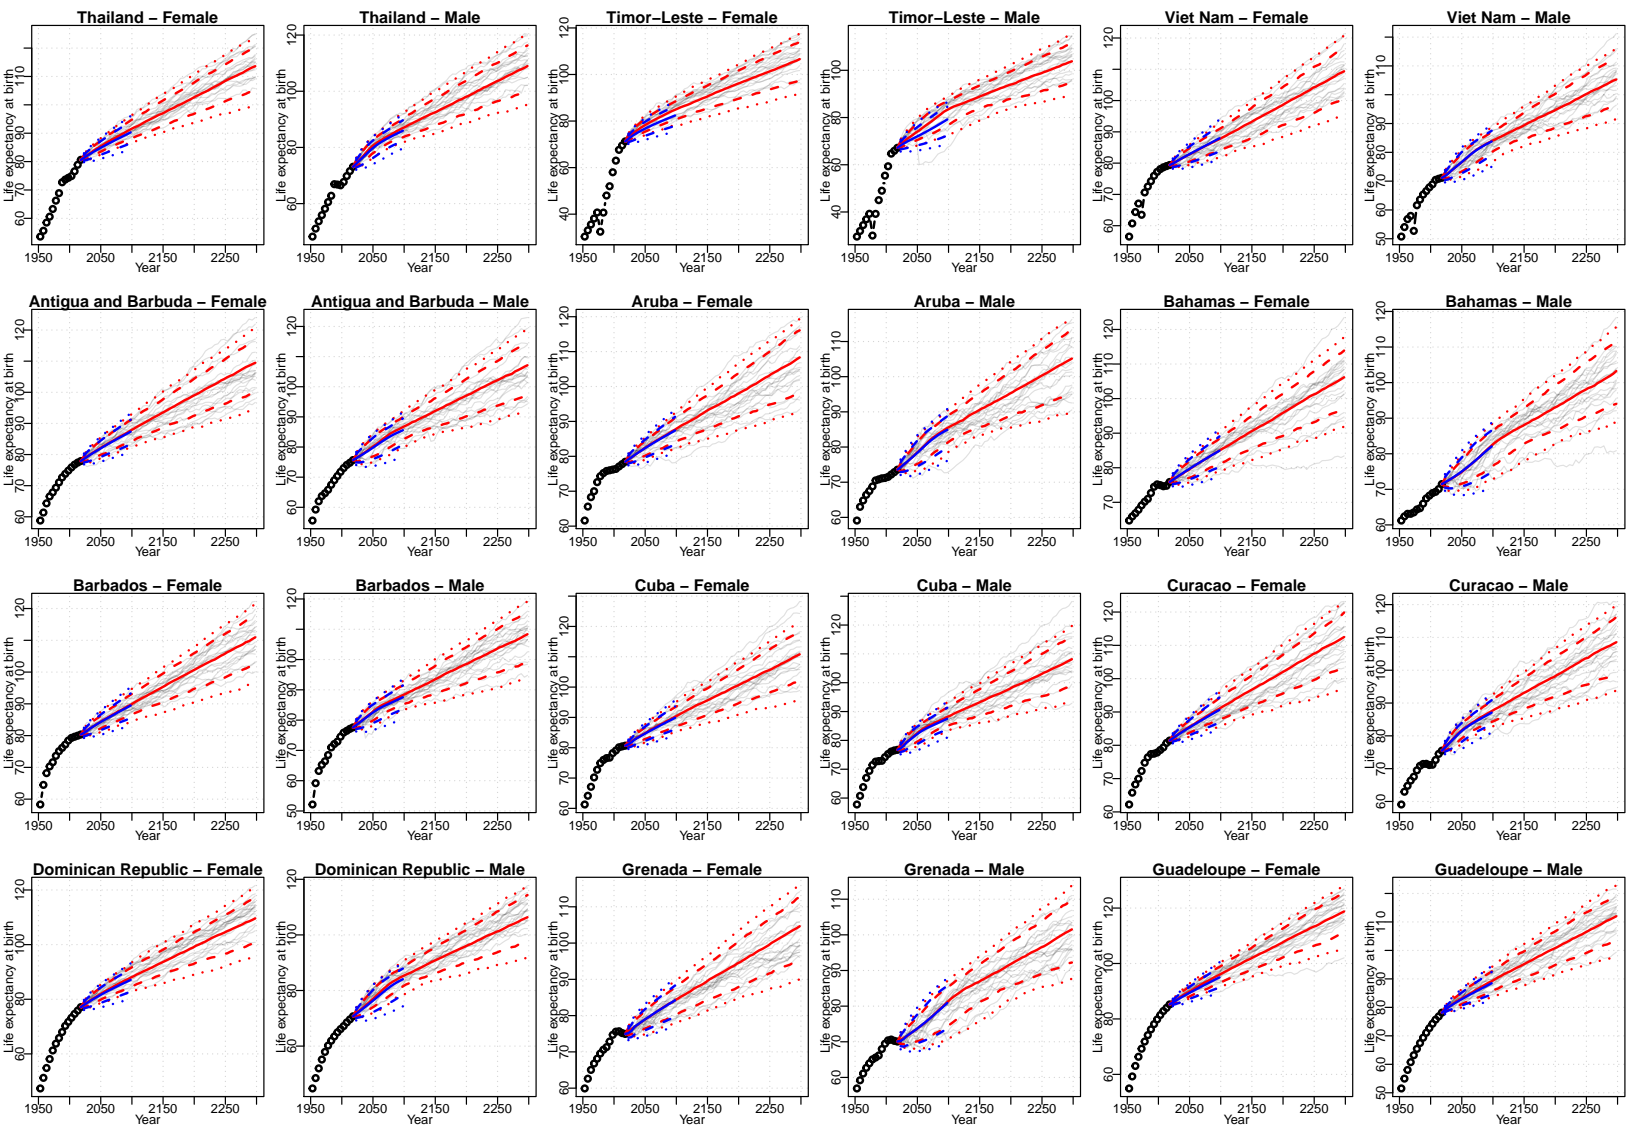



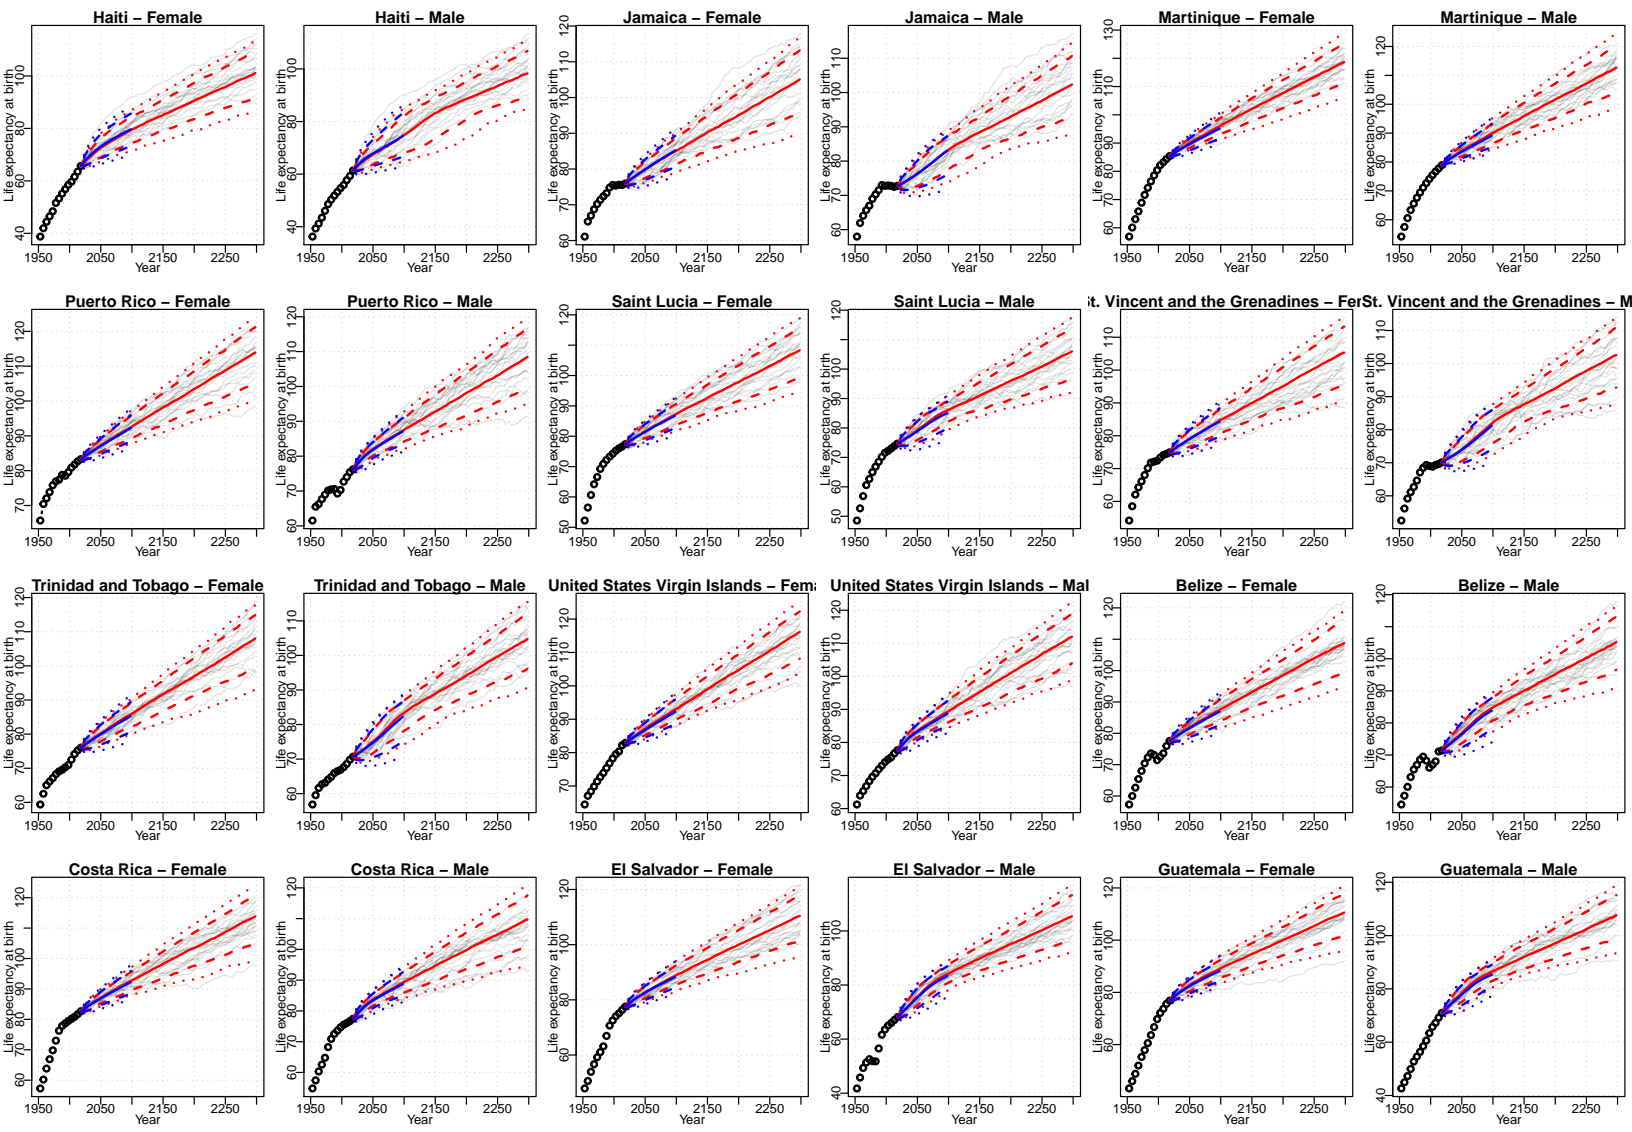

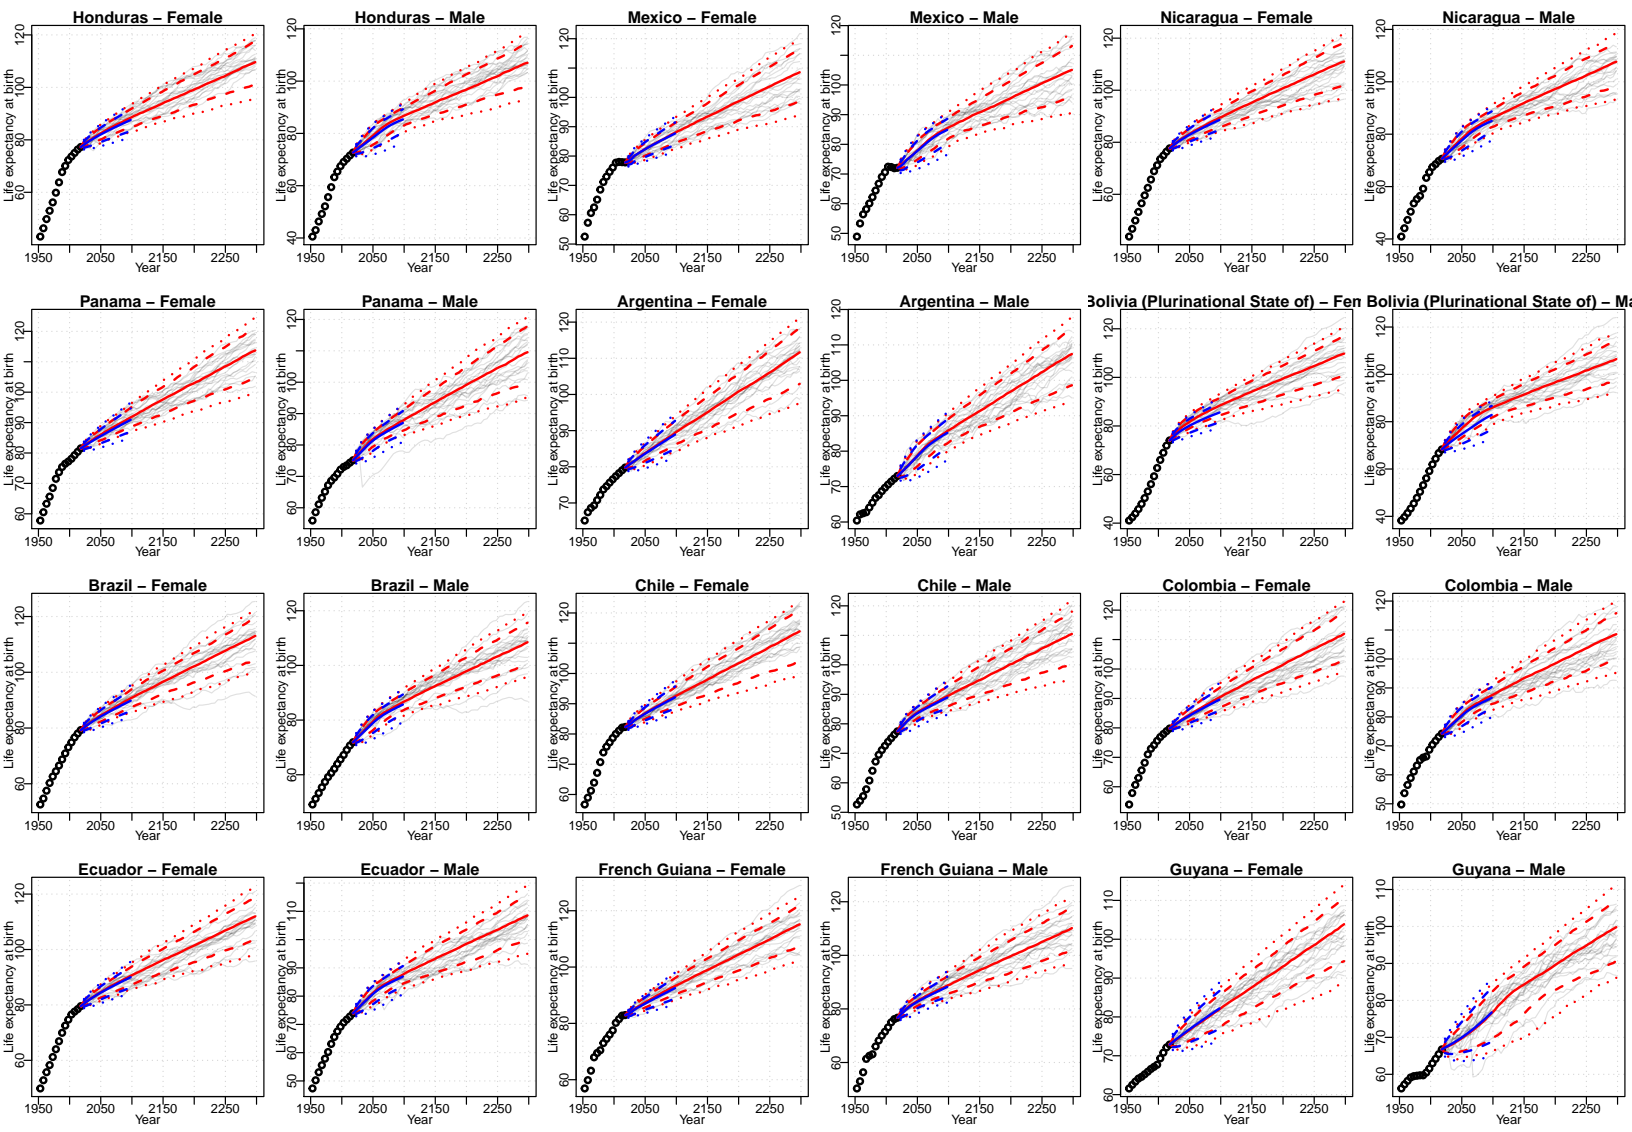

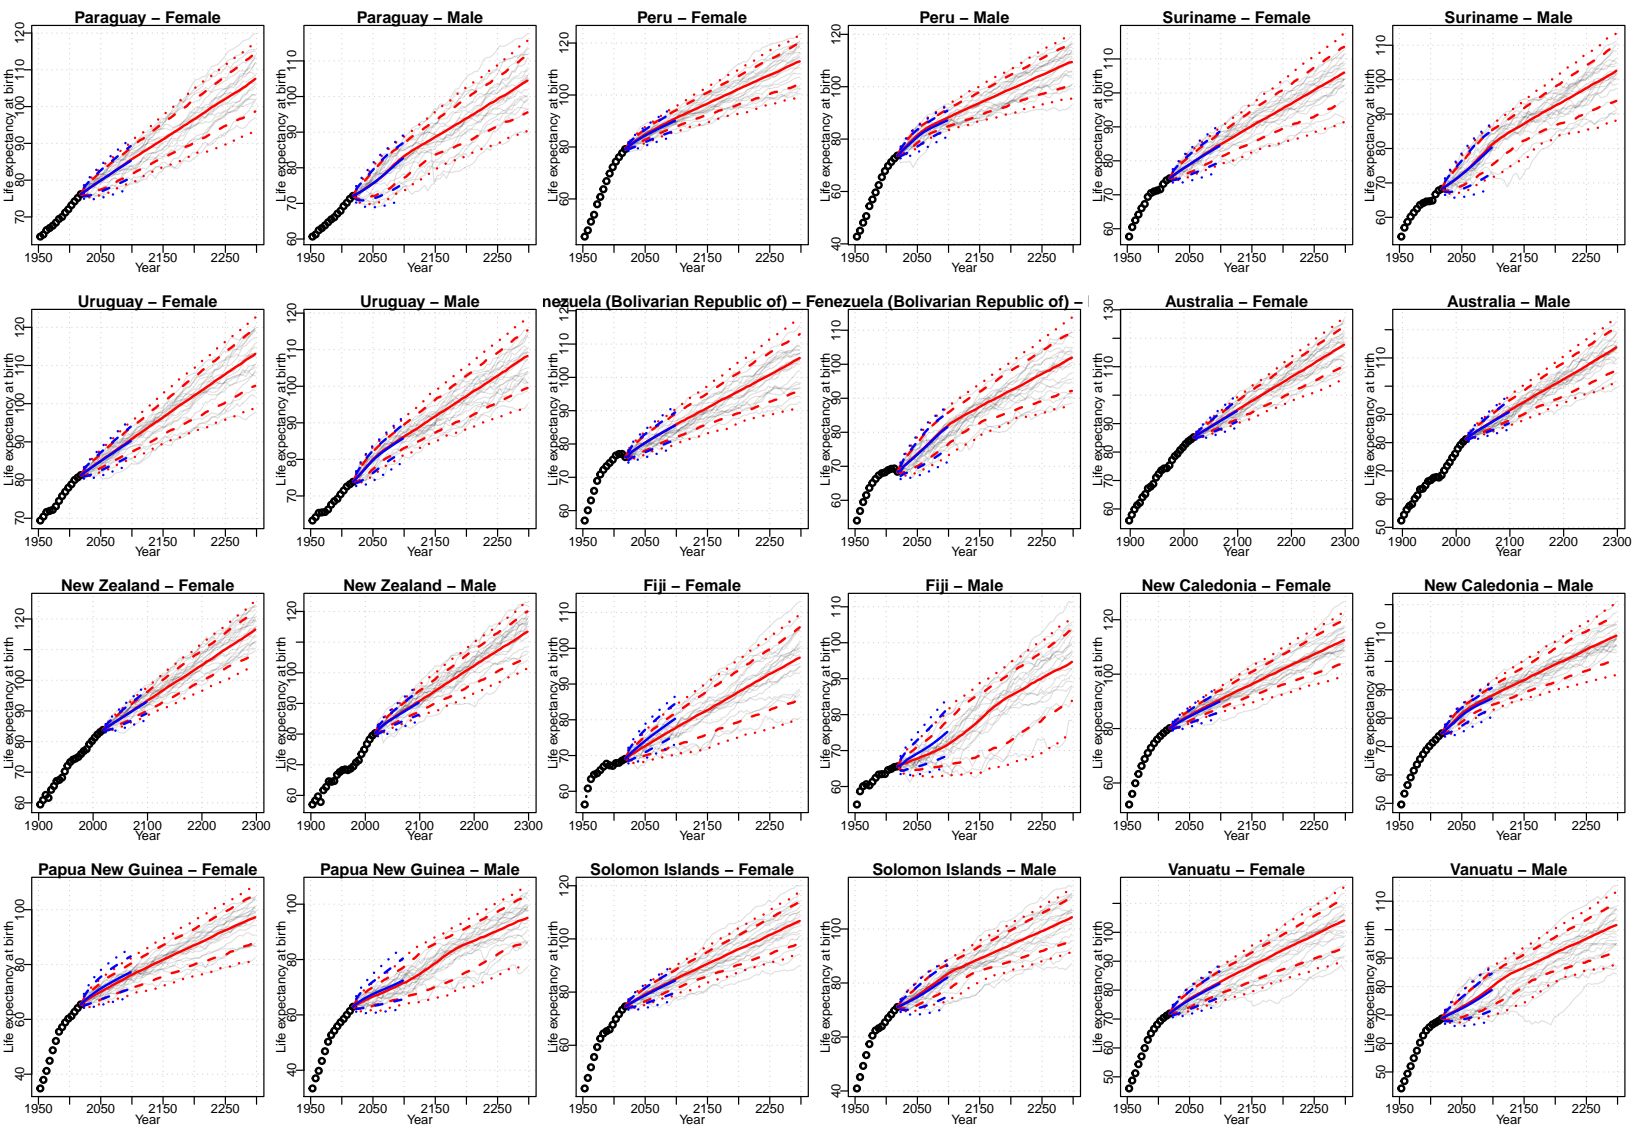

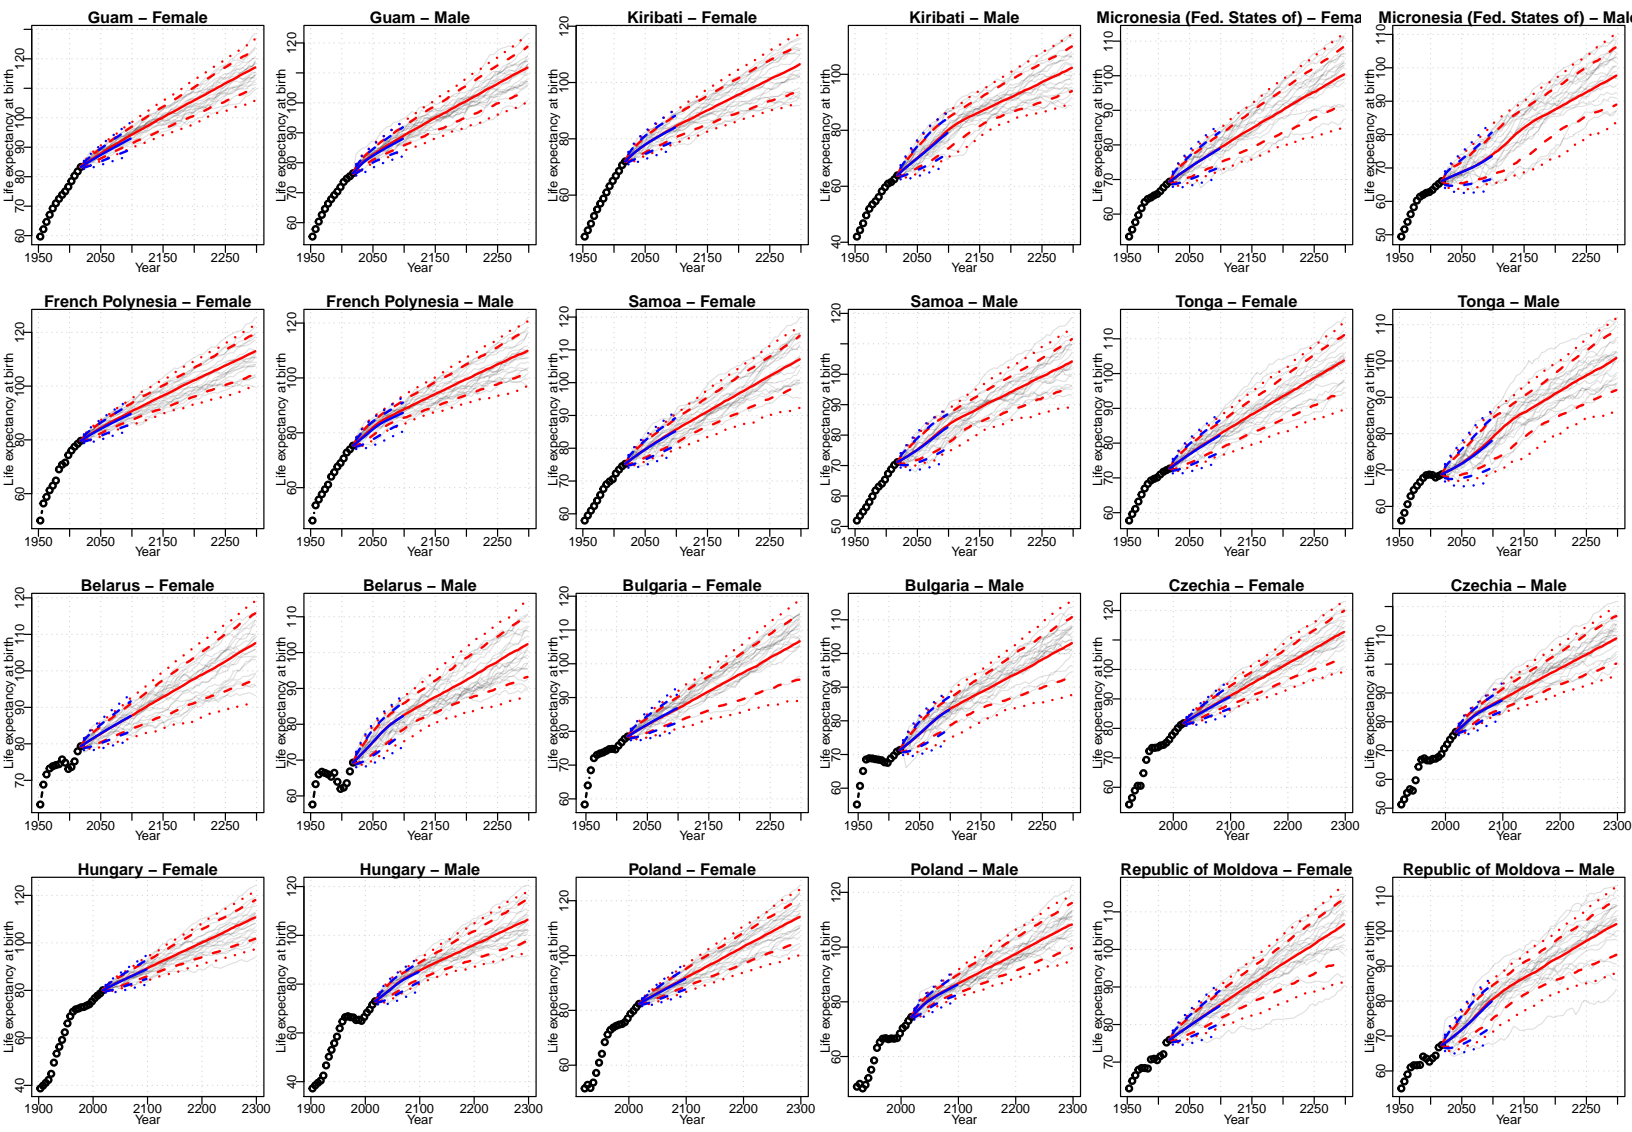

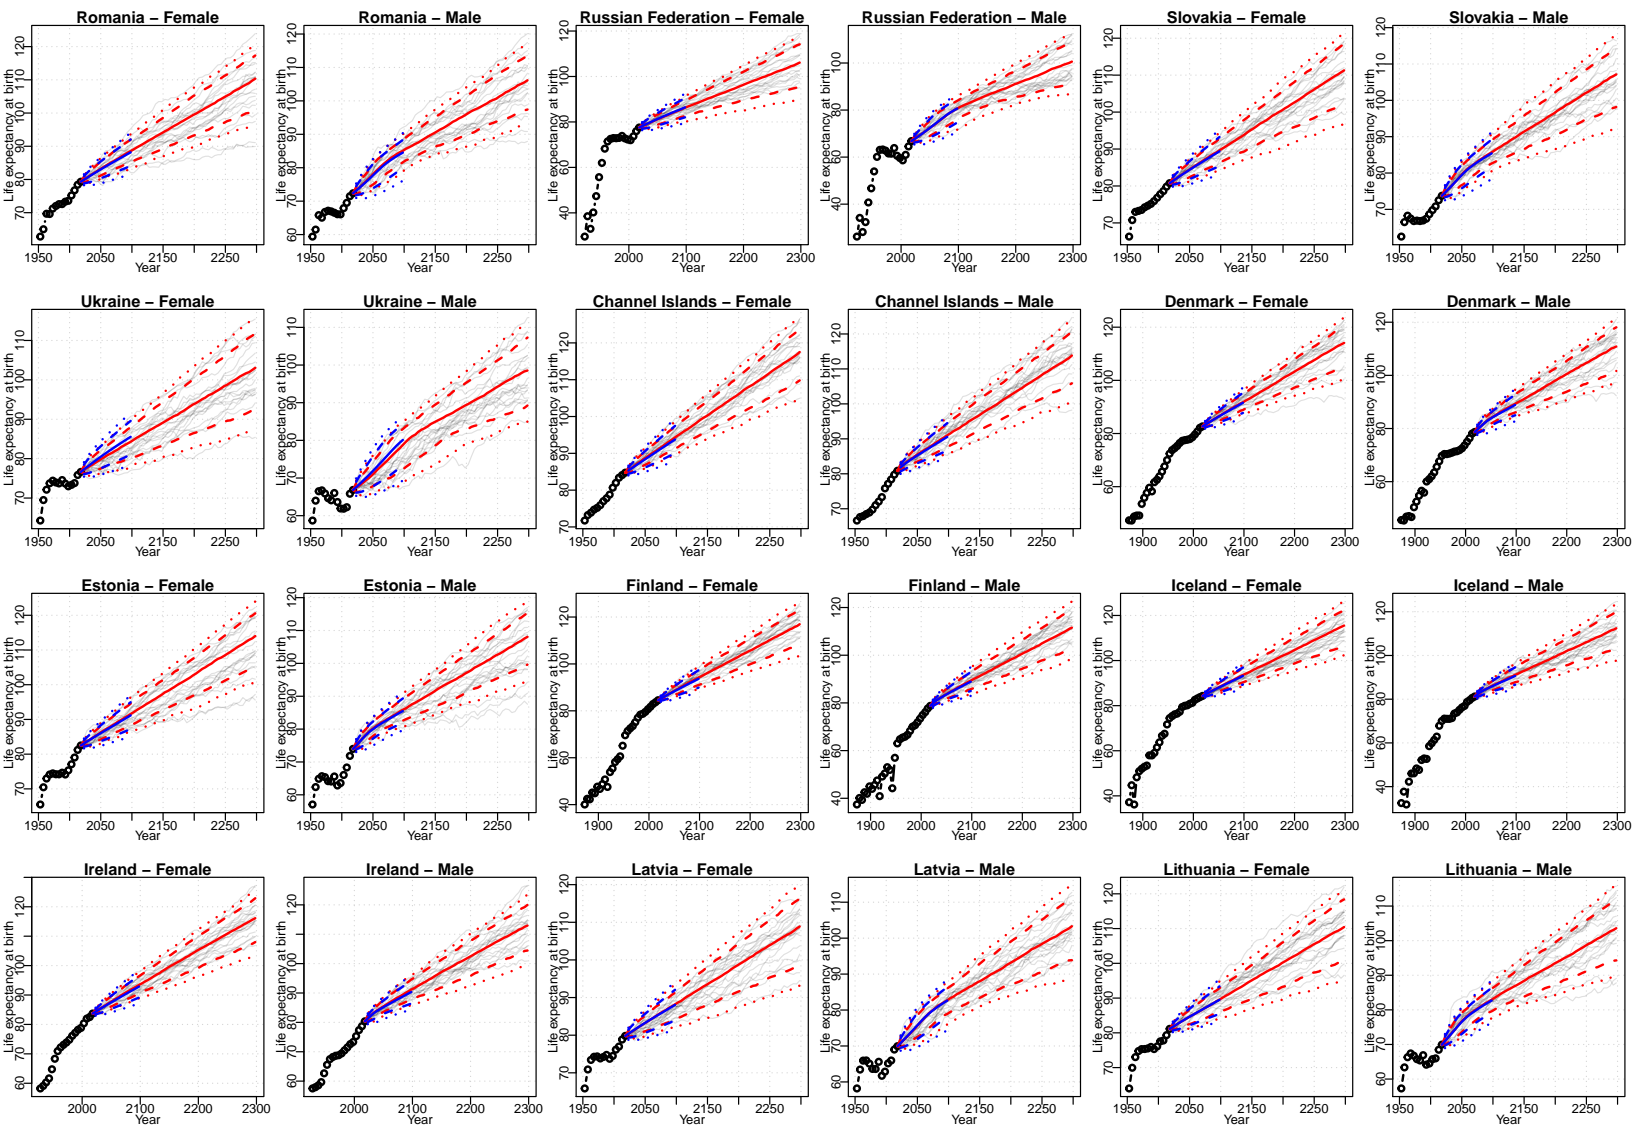



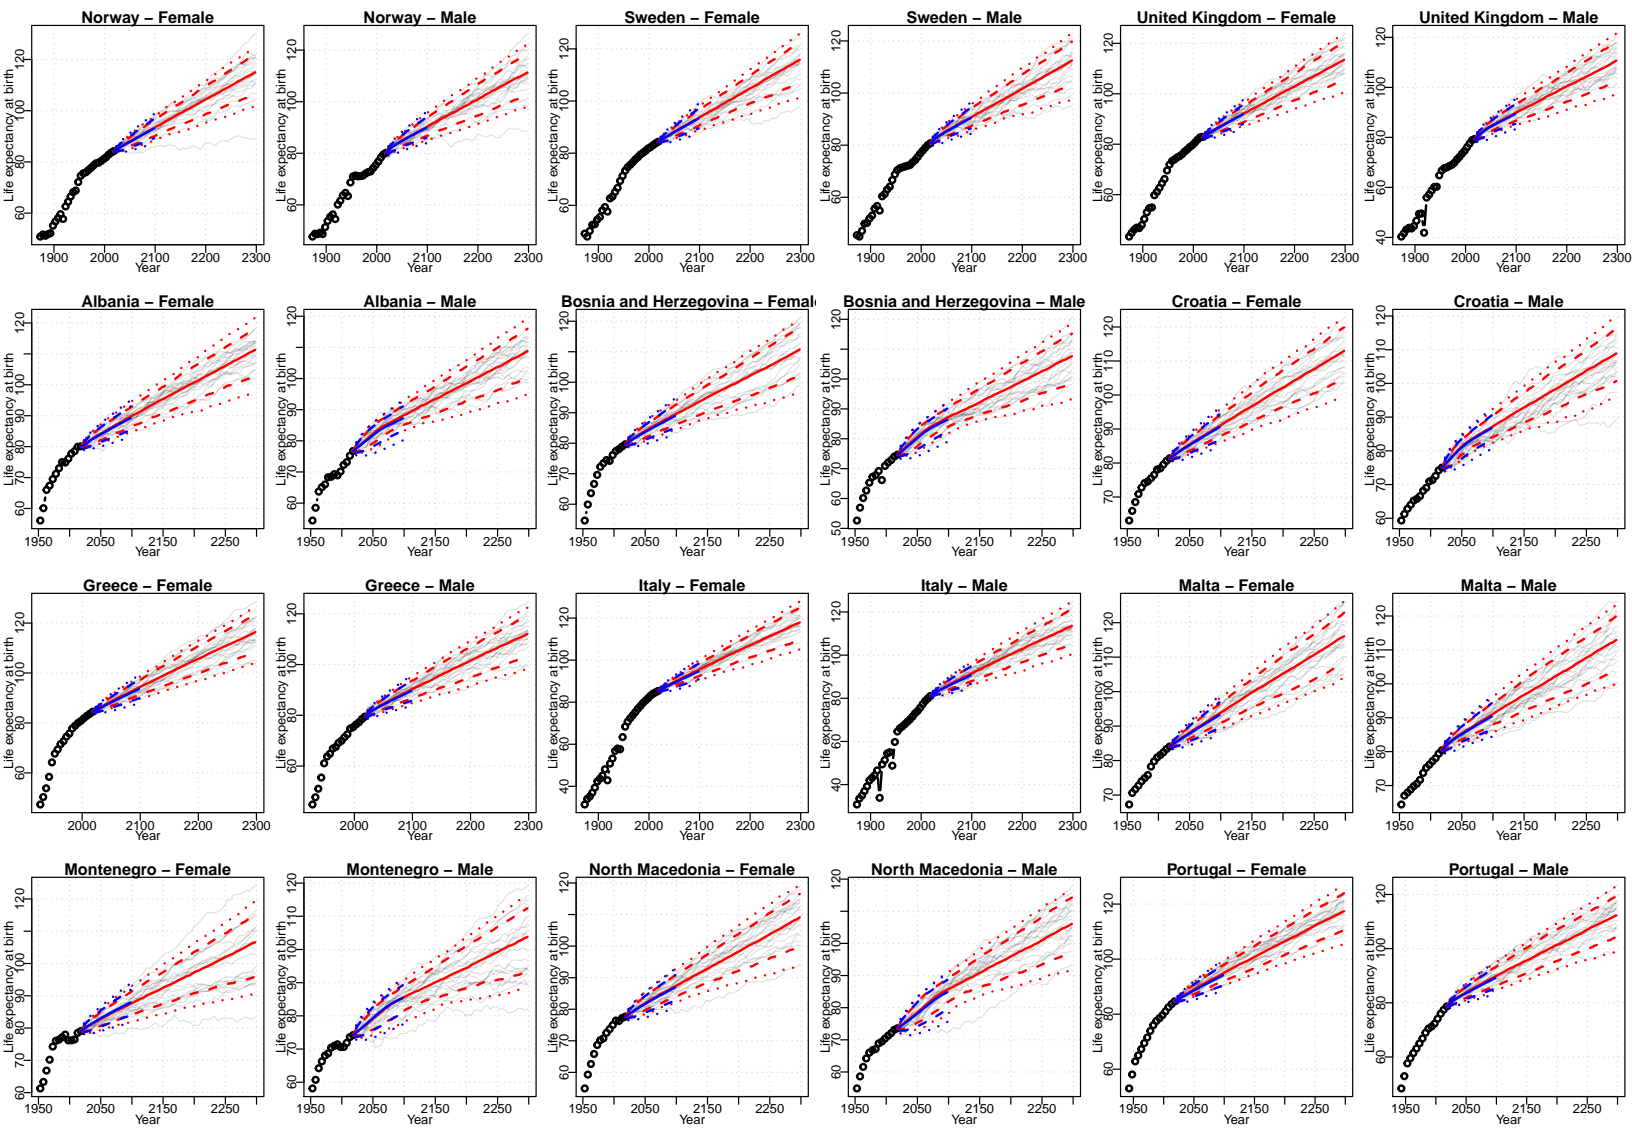

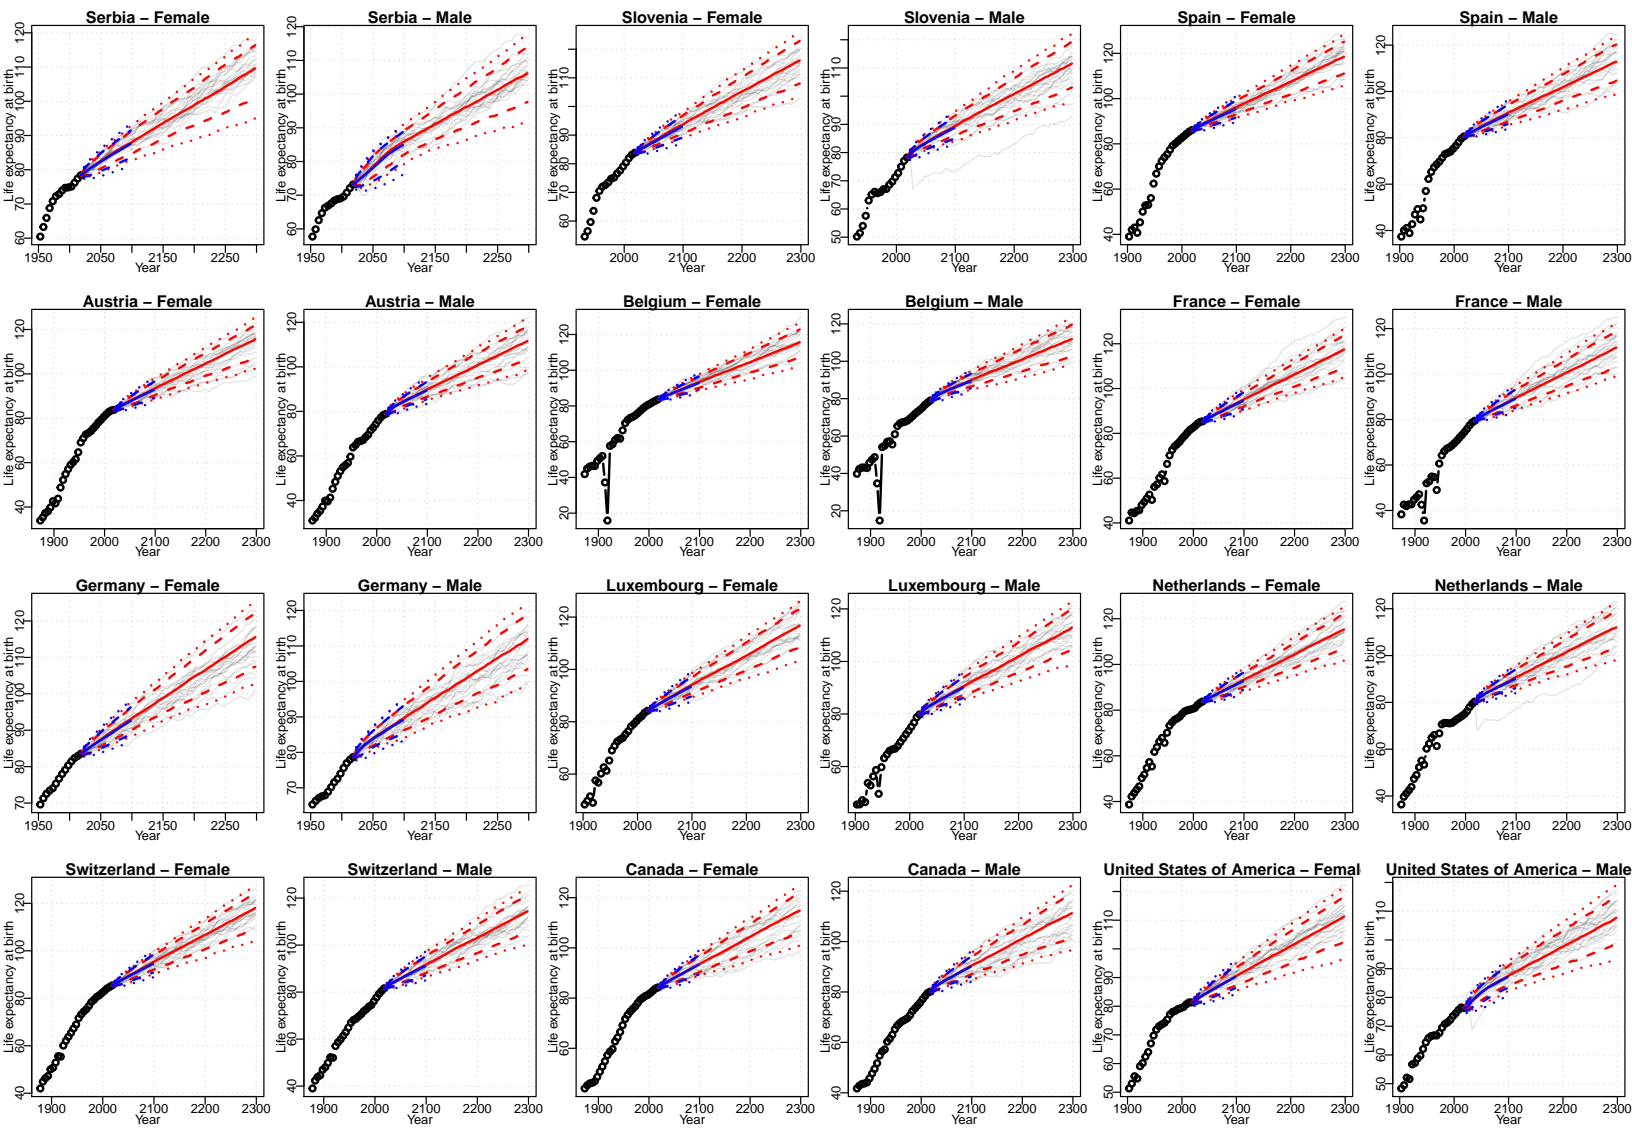



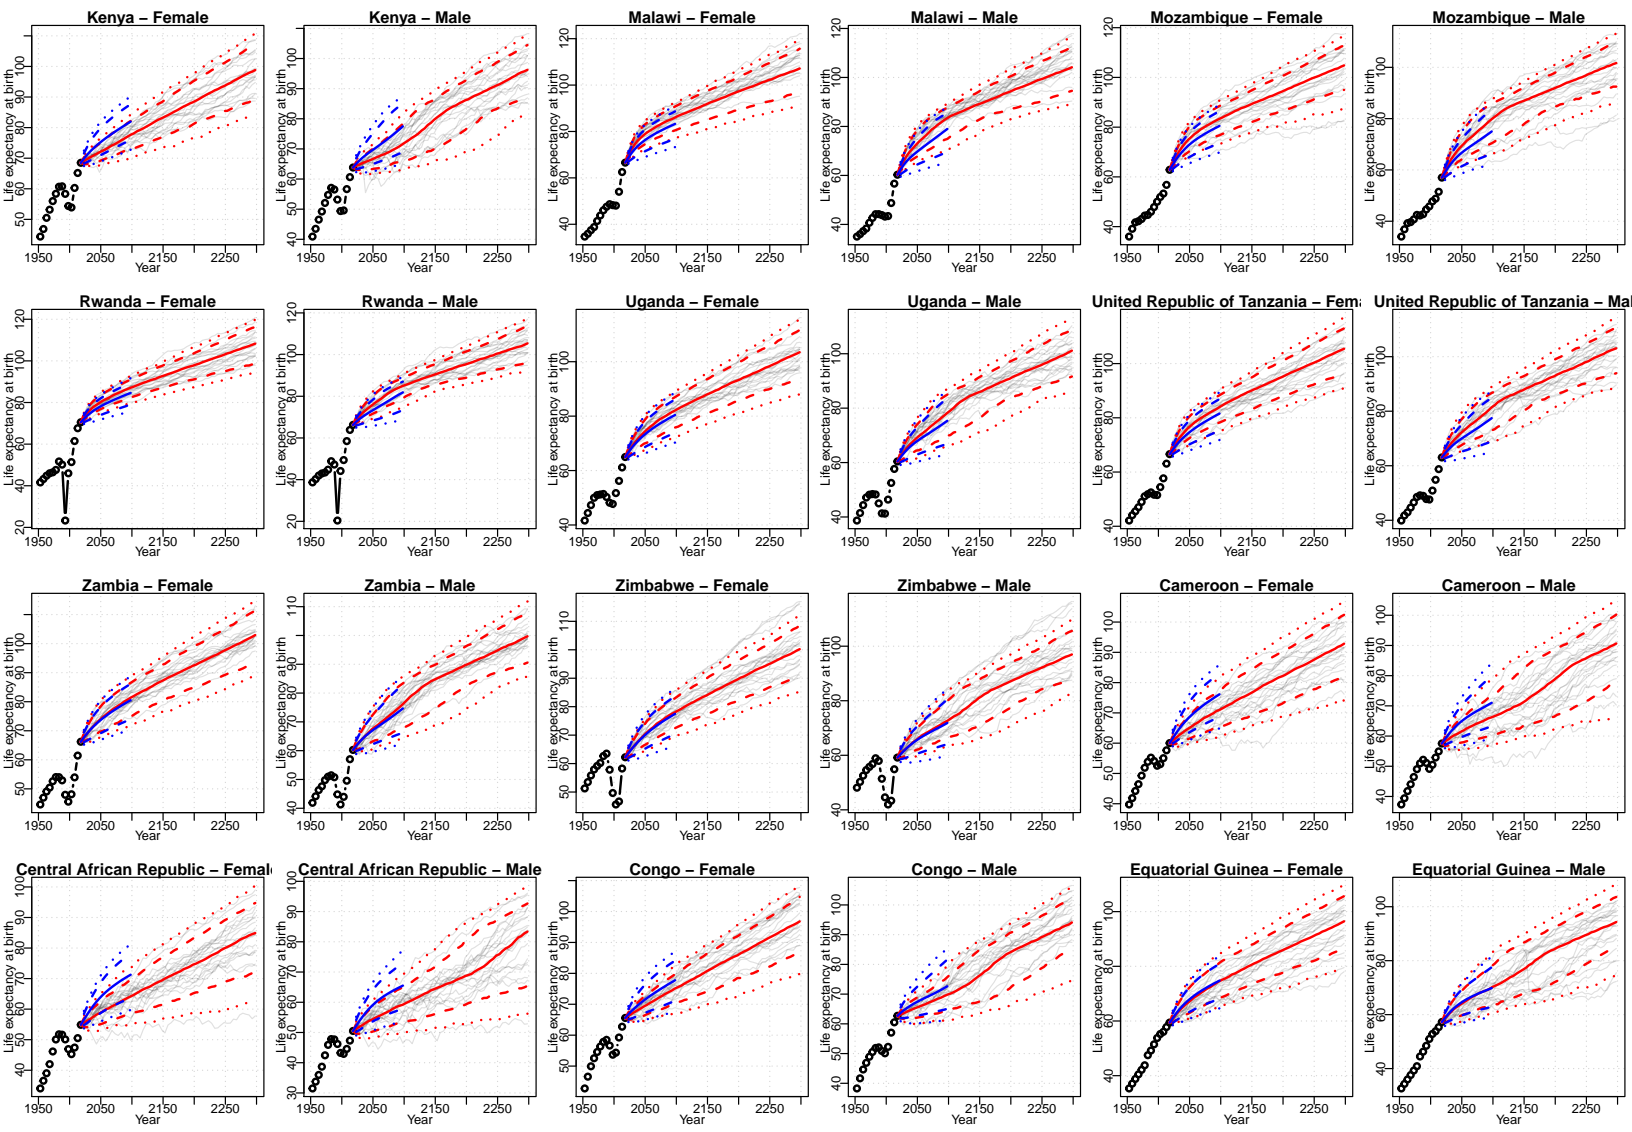

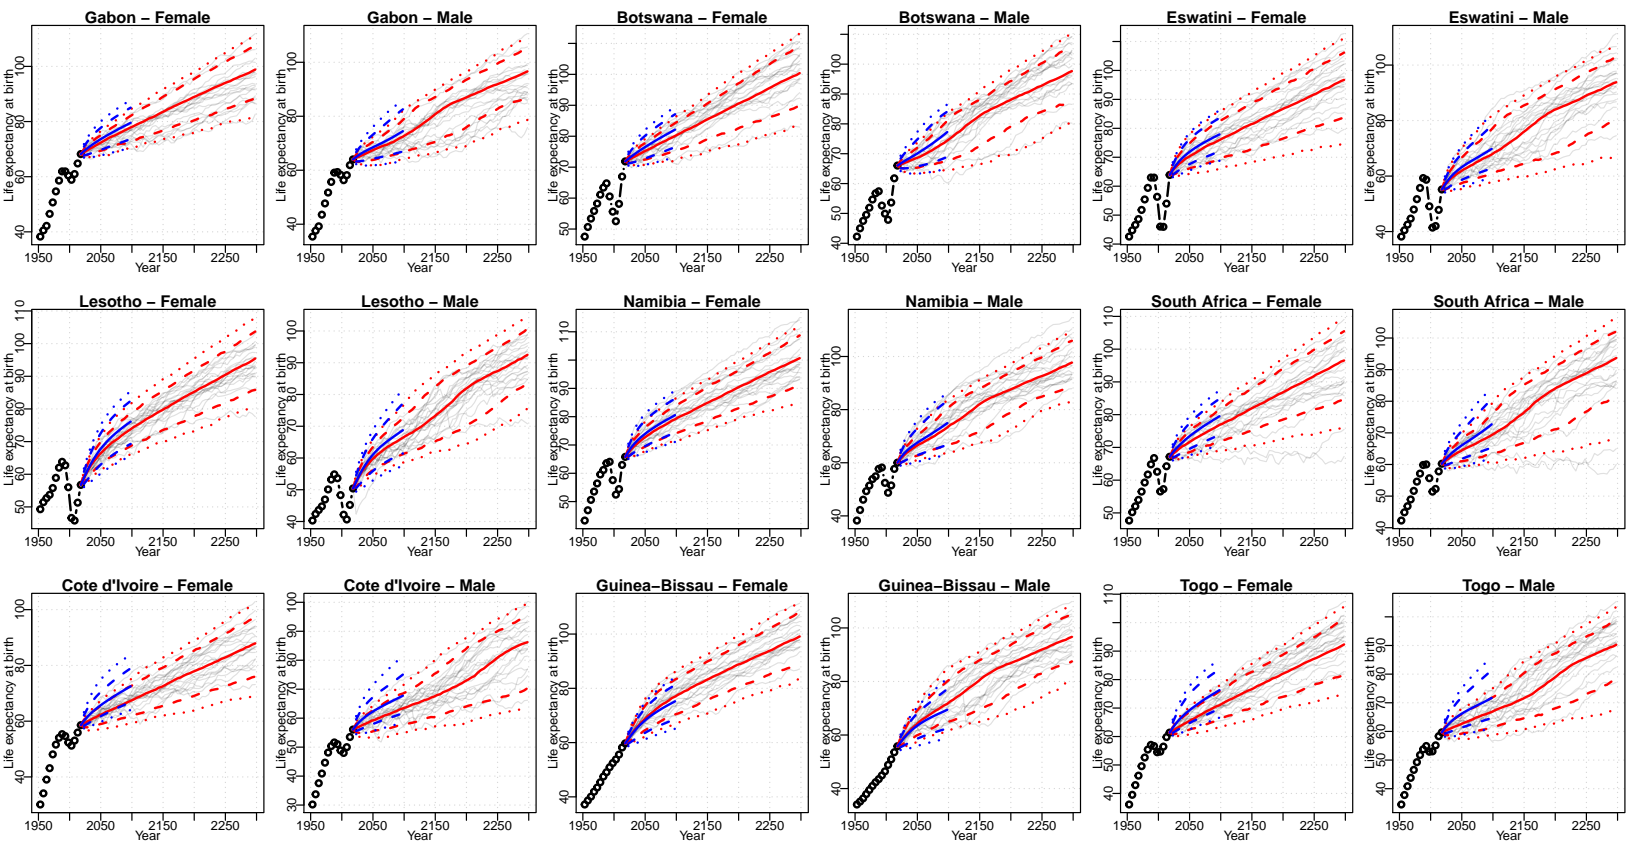

## C Net migration for all countries

These plots show probabilistic projections of net international migration for all countries, in thousands, by five-year time period to 2300. The solid black circles show historic net migration from 1950 to 2020. The red curve shows the predictive median and the pink shaded area shows the 80% predictive interval. The blue line shows the UN's deterministic projection to 2100.

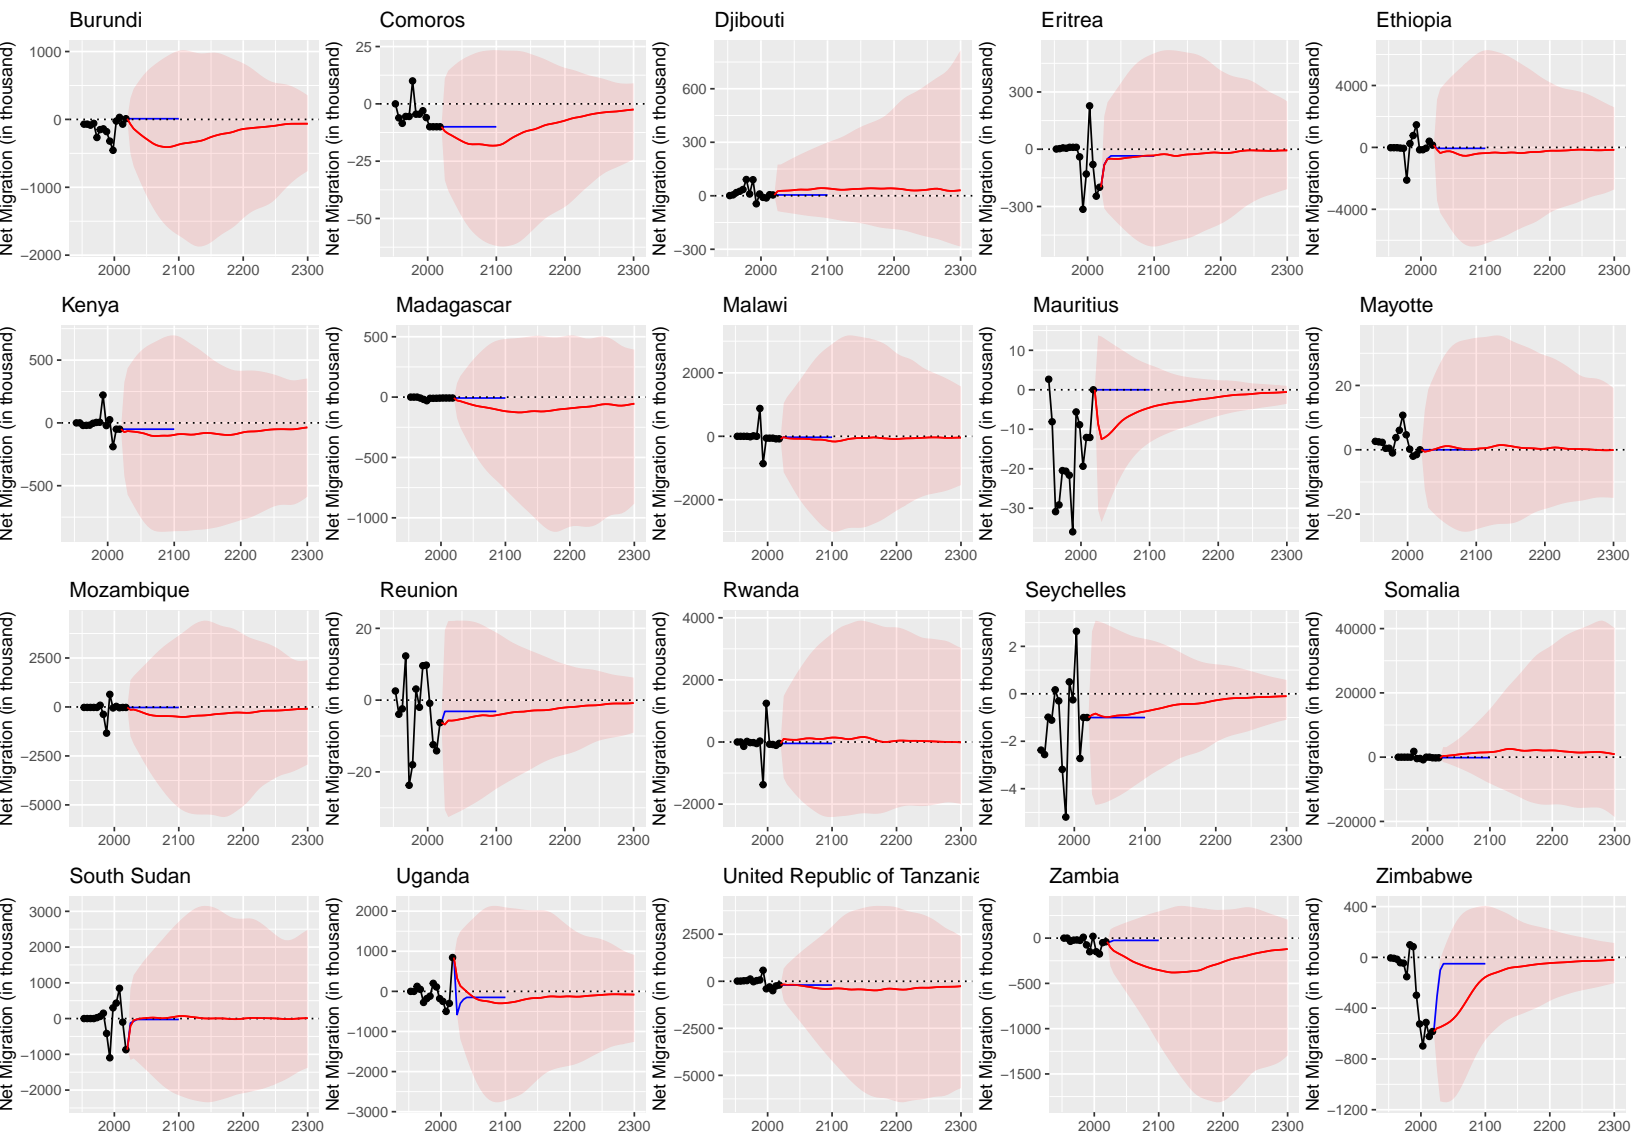

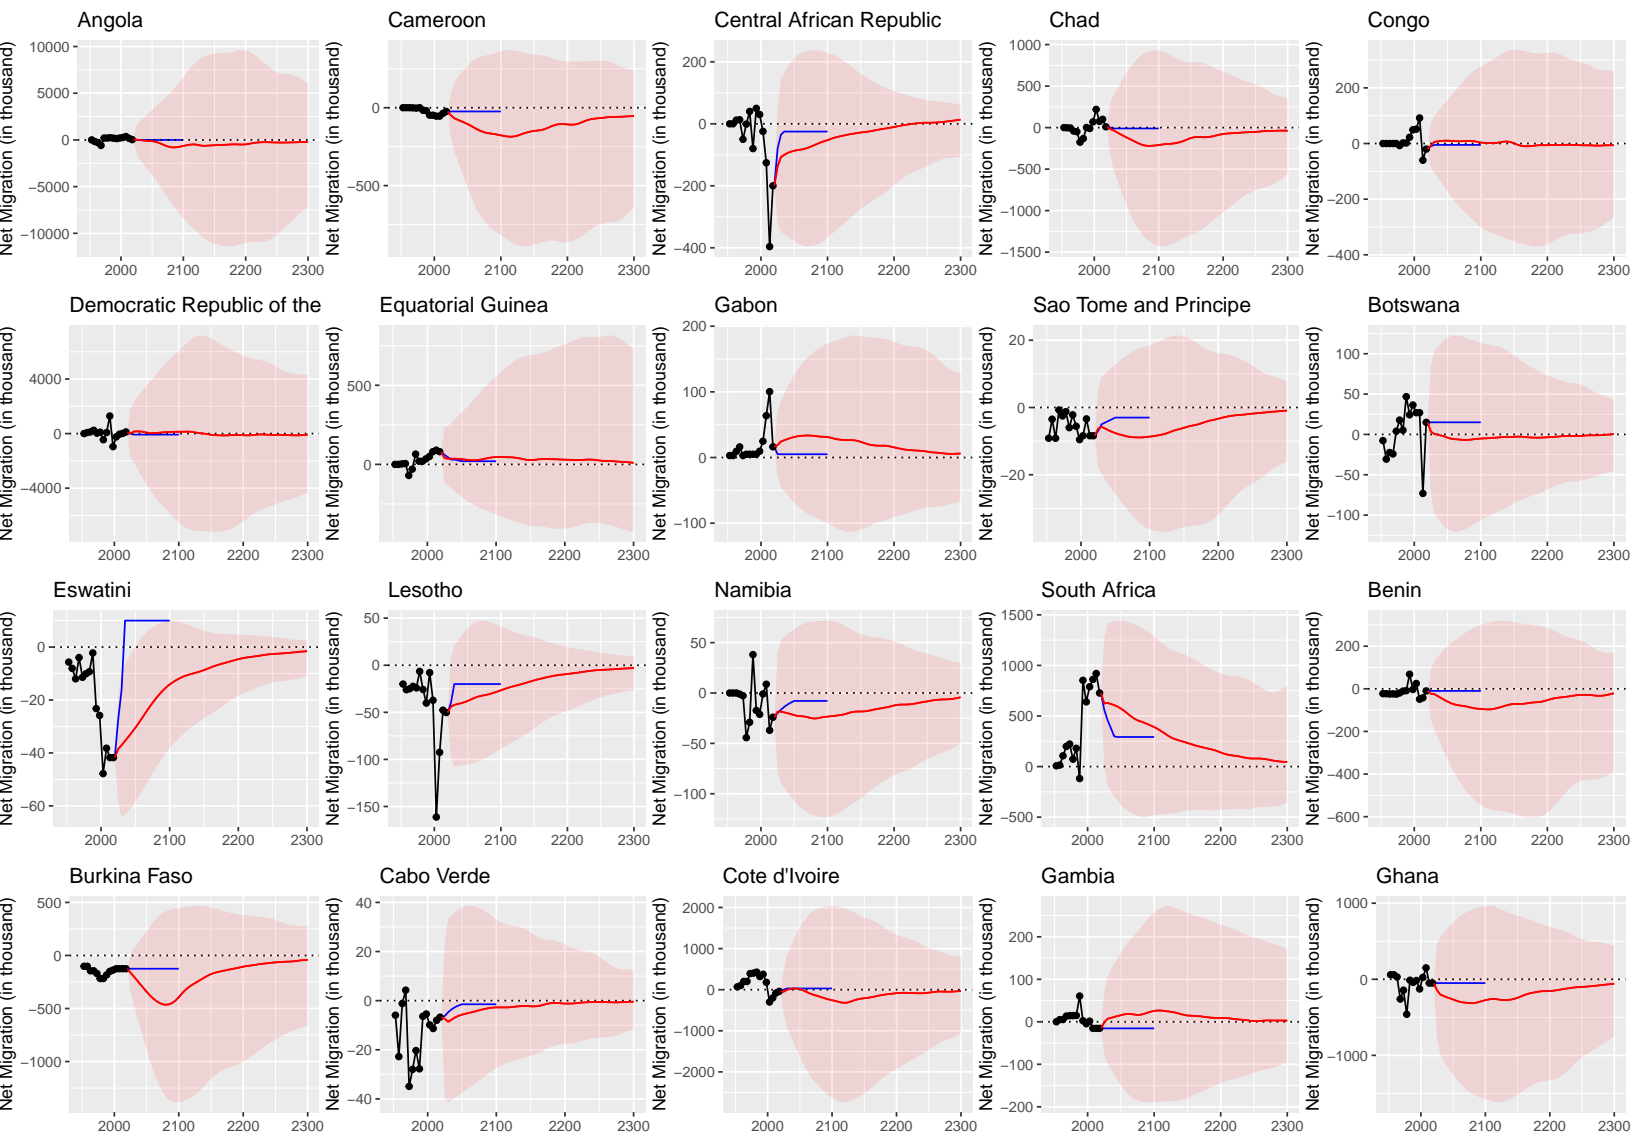

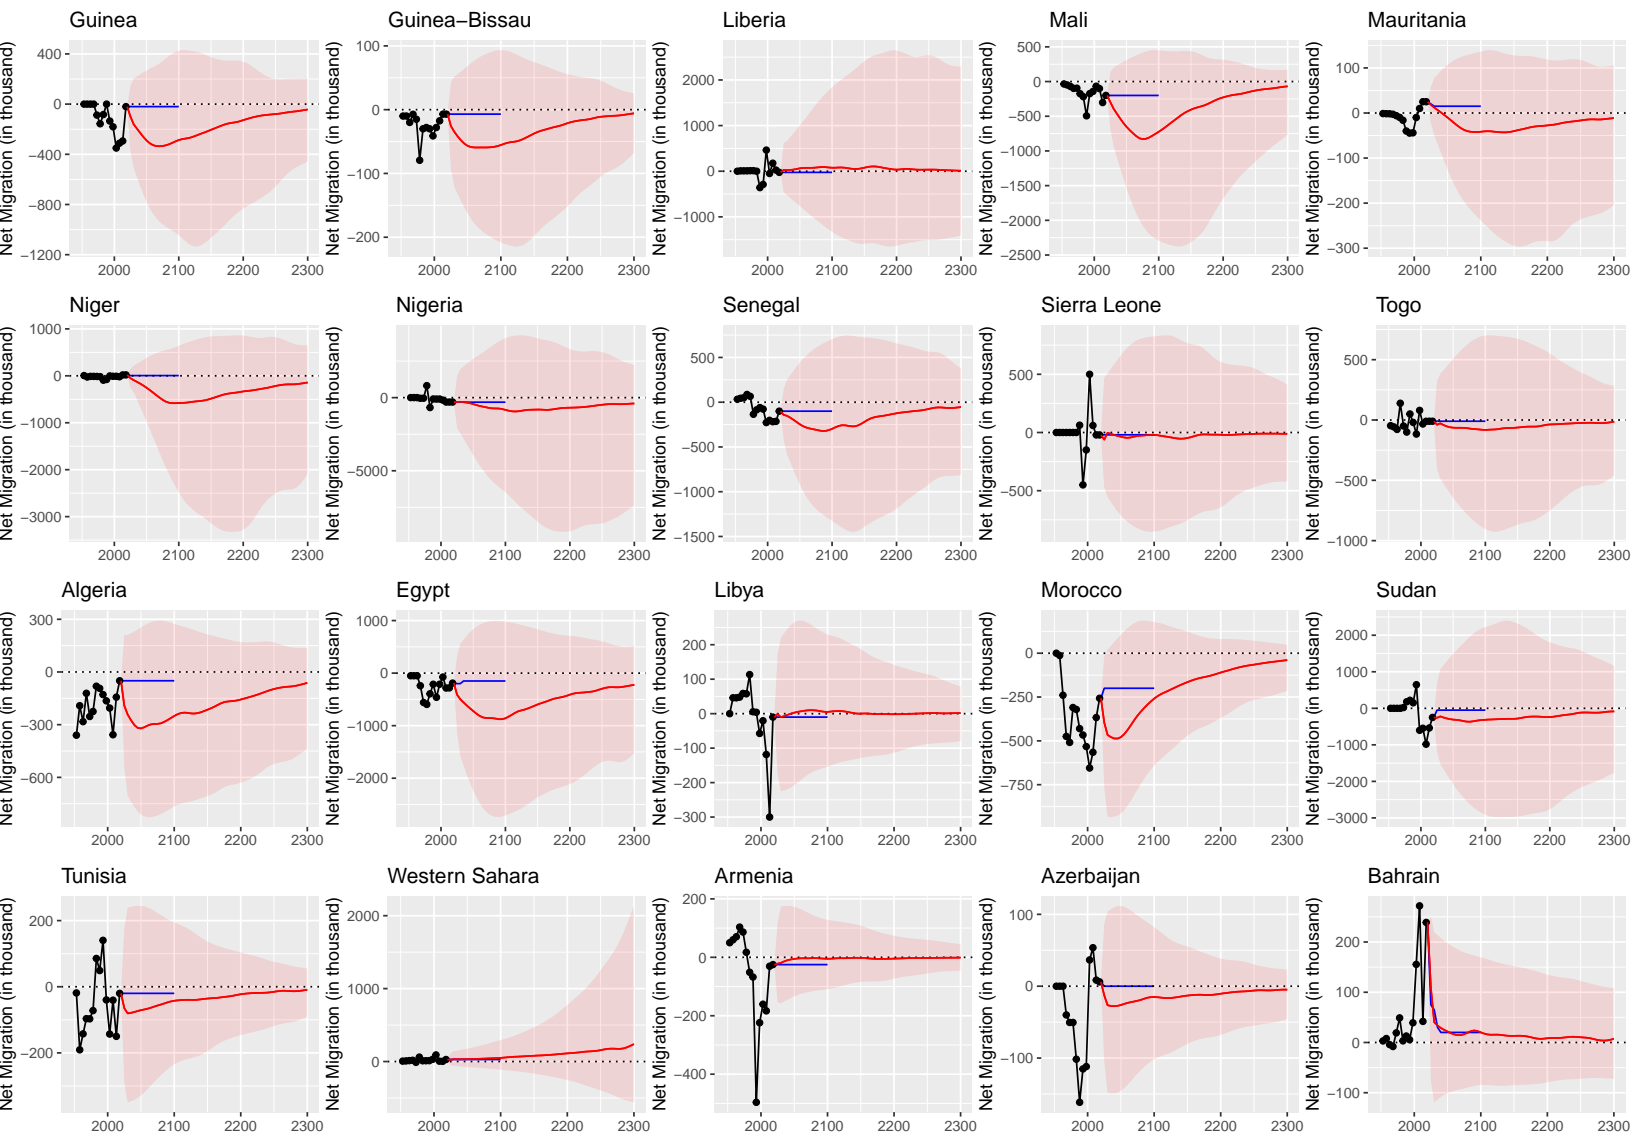

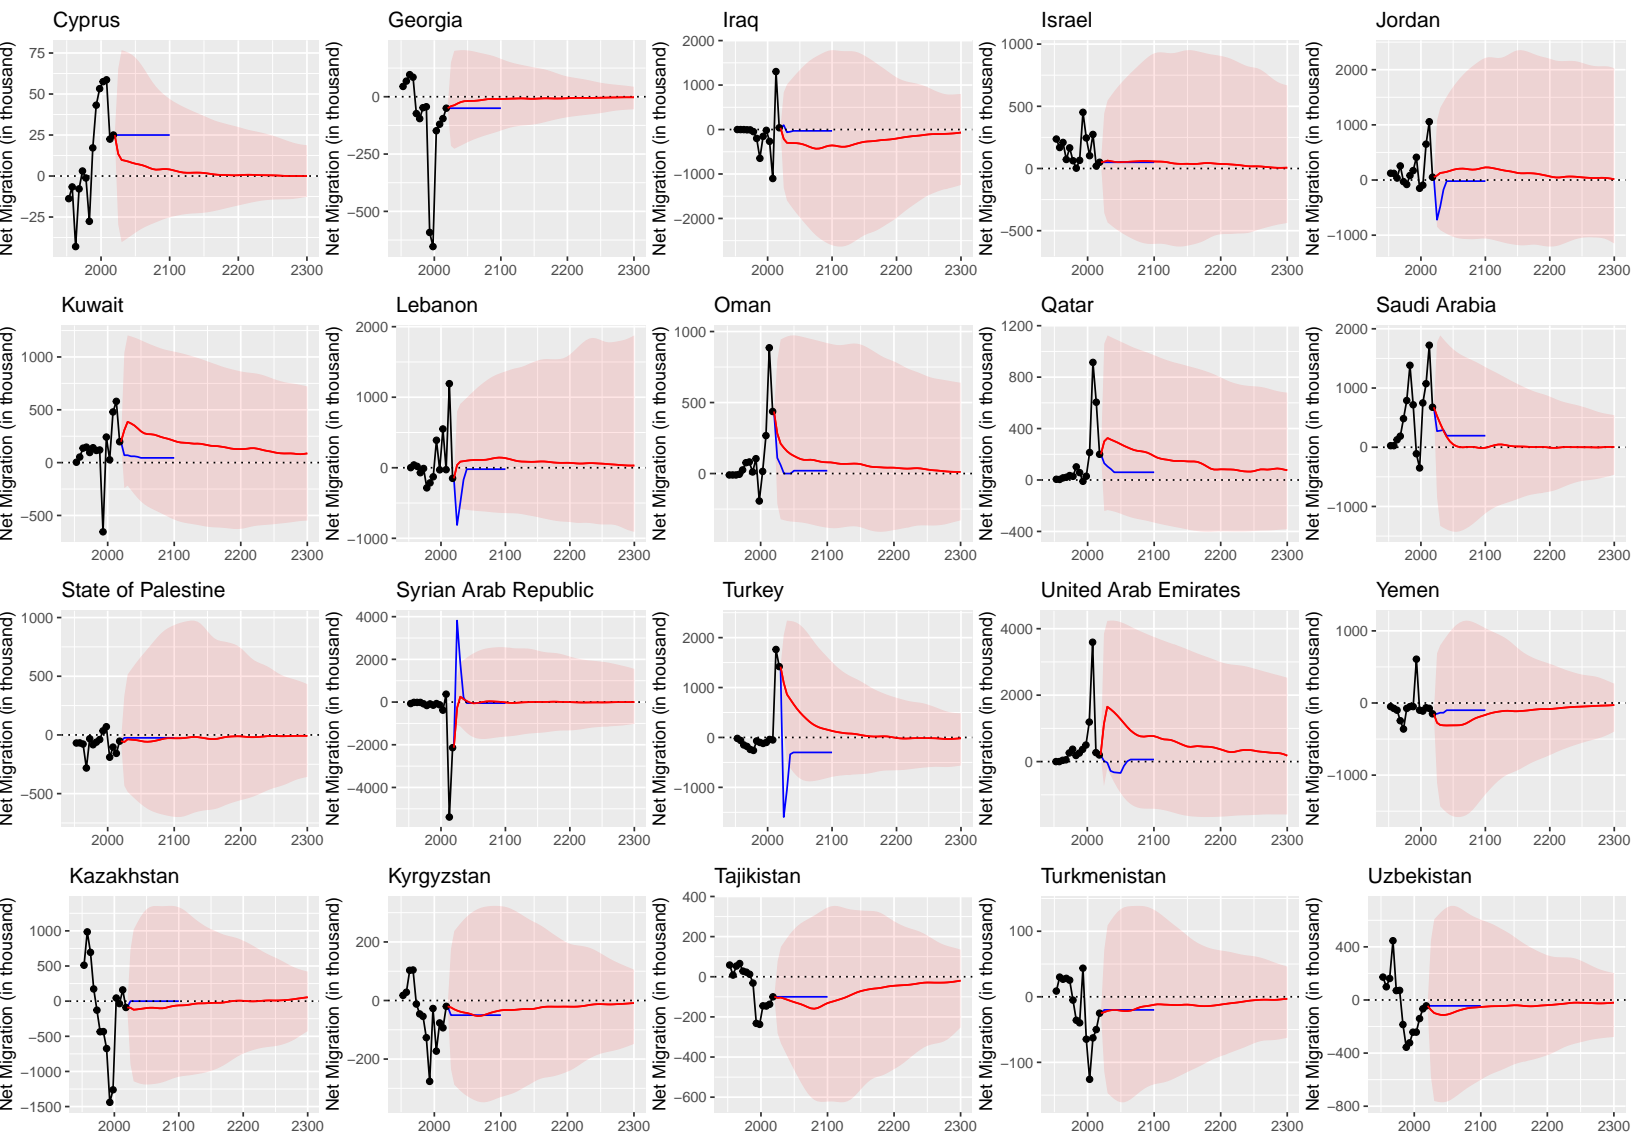



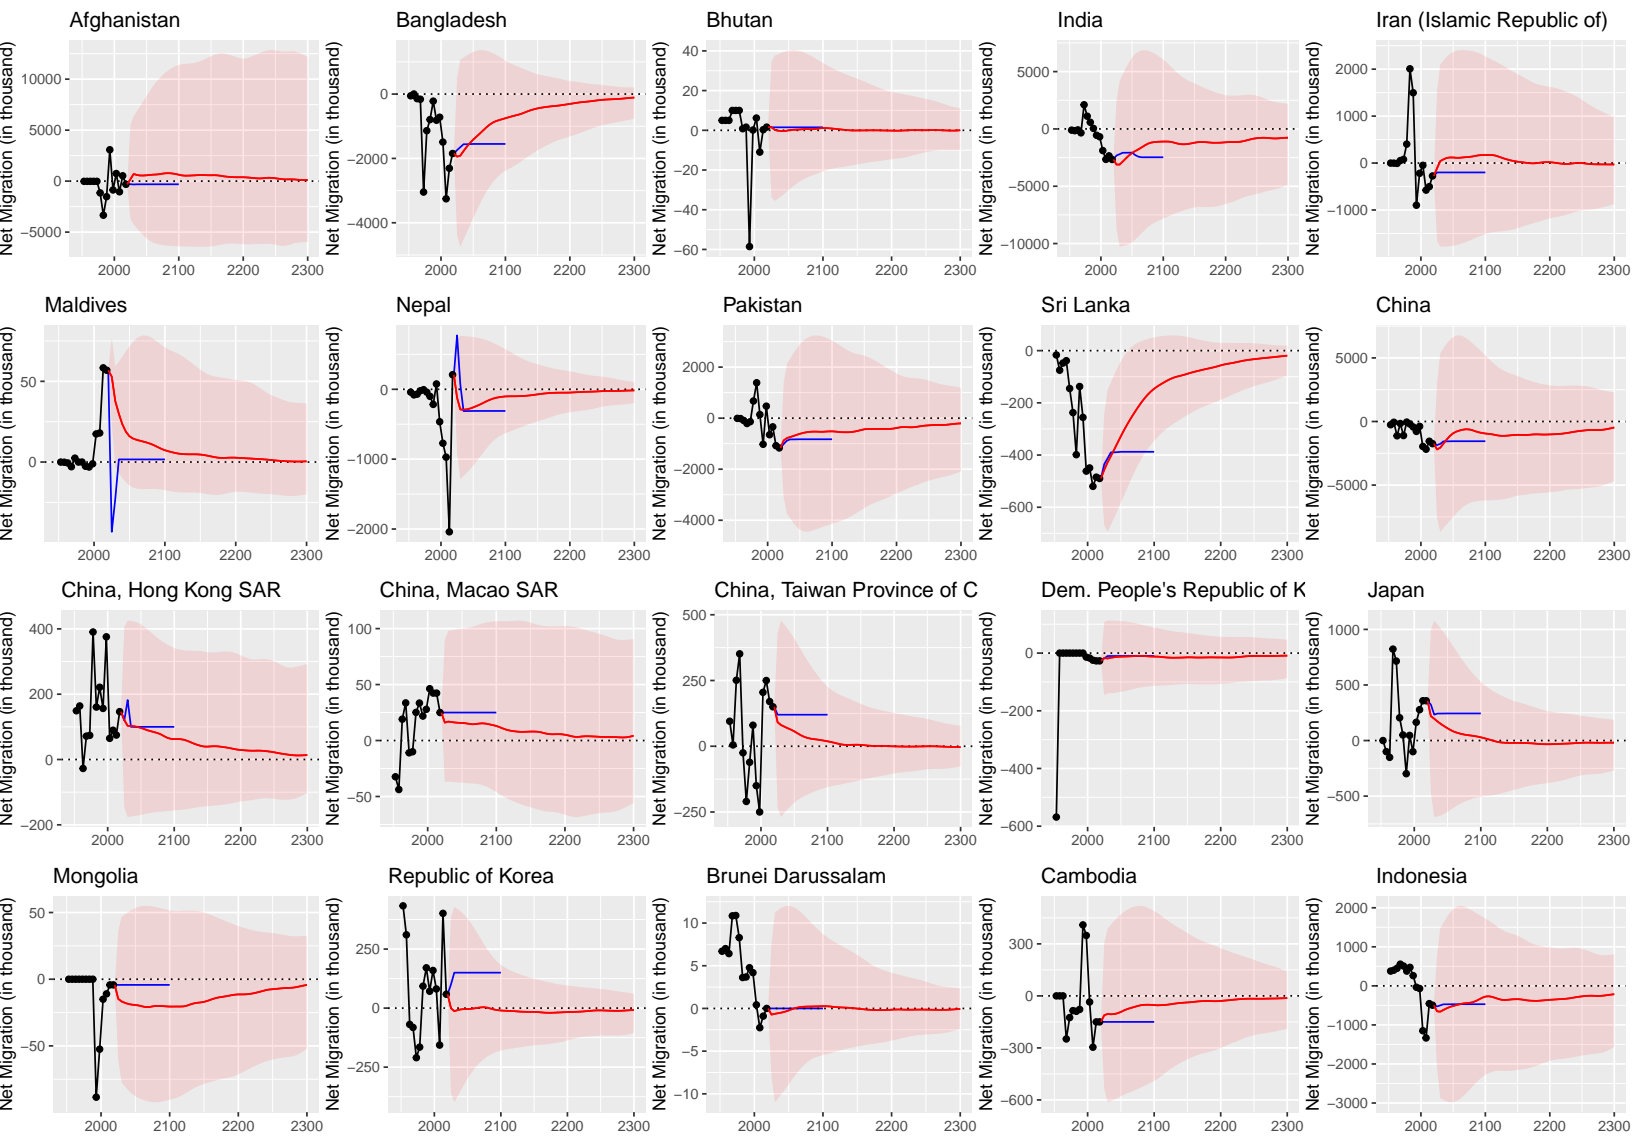

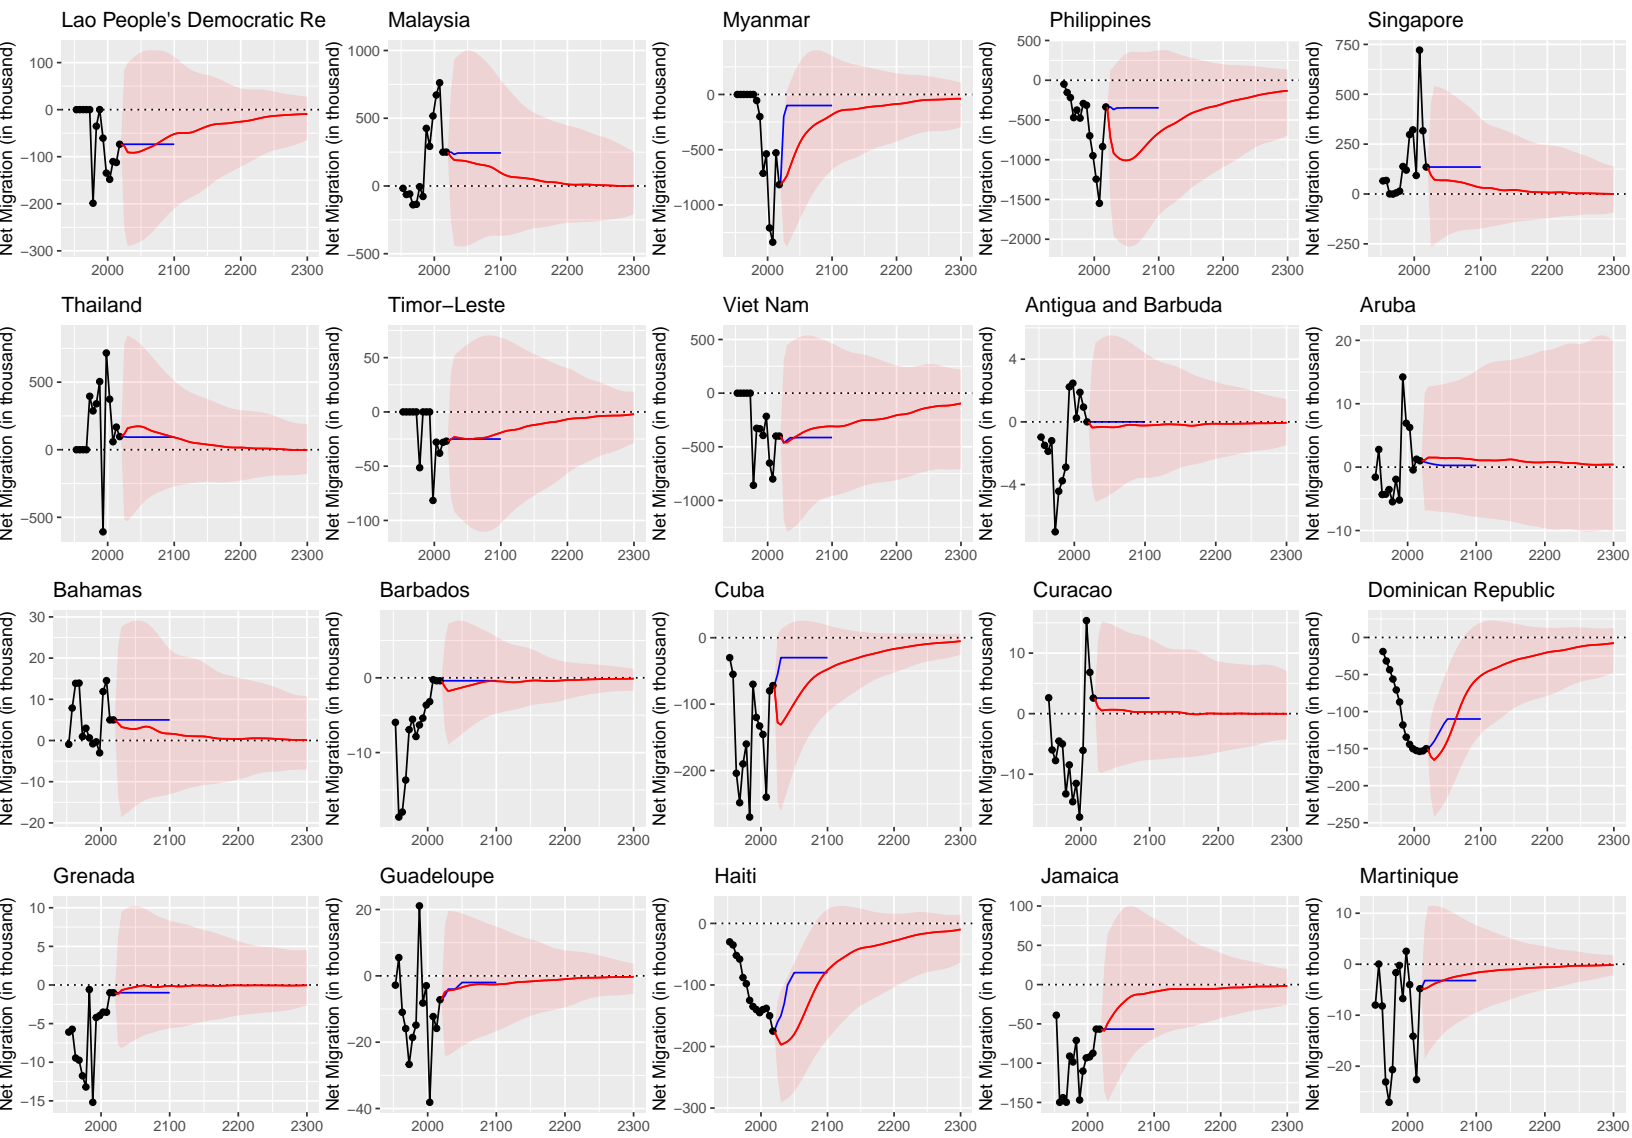

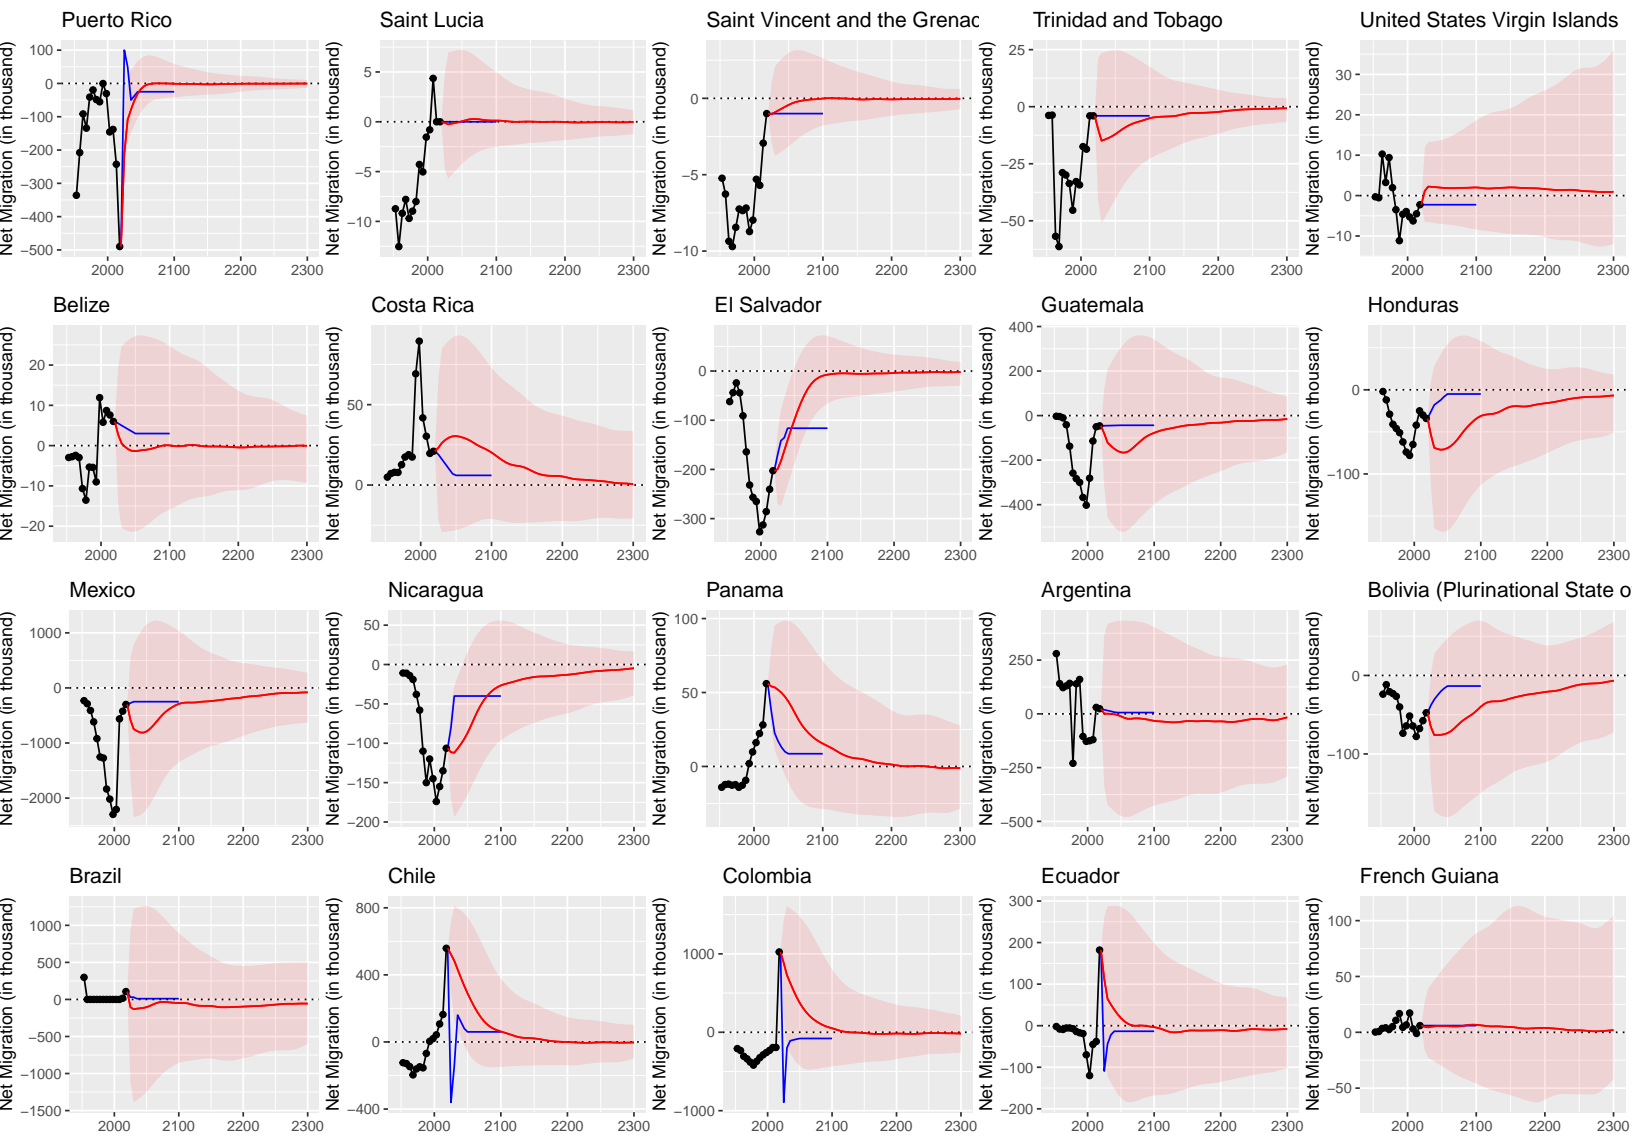

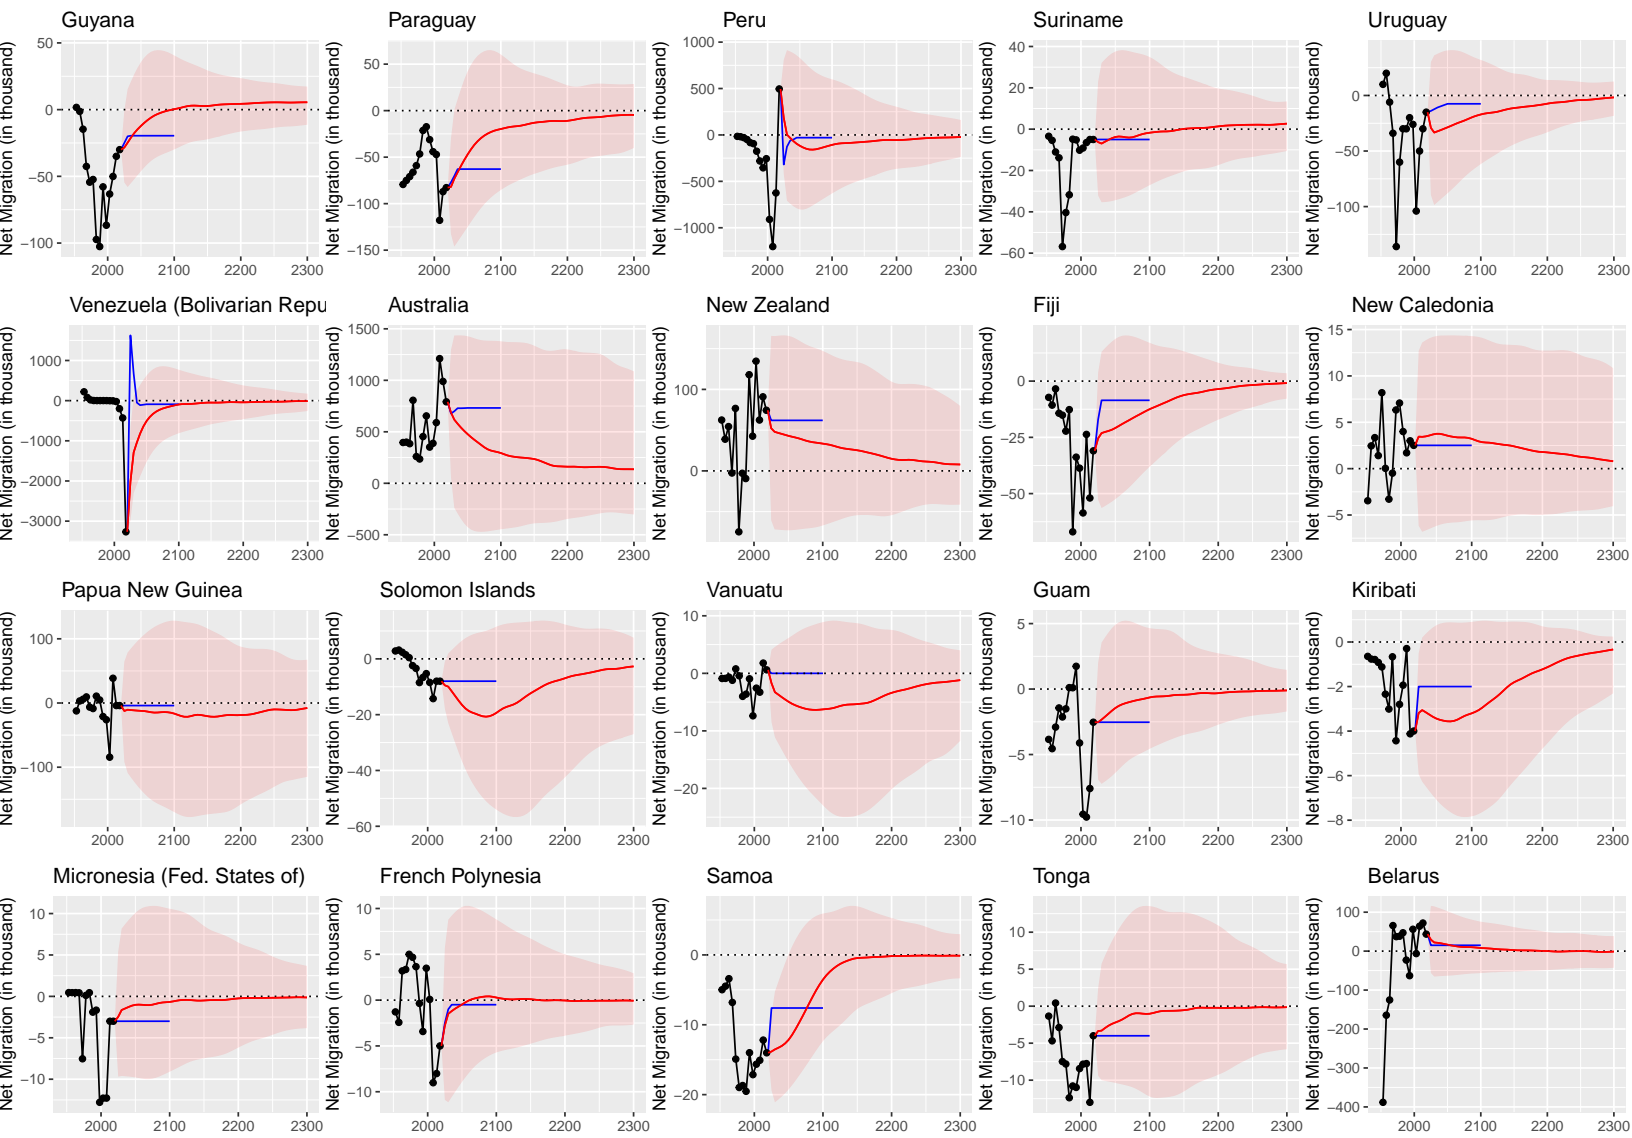

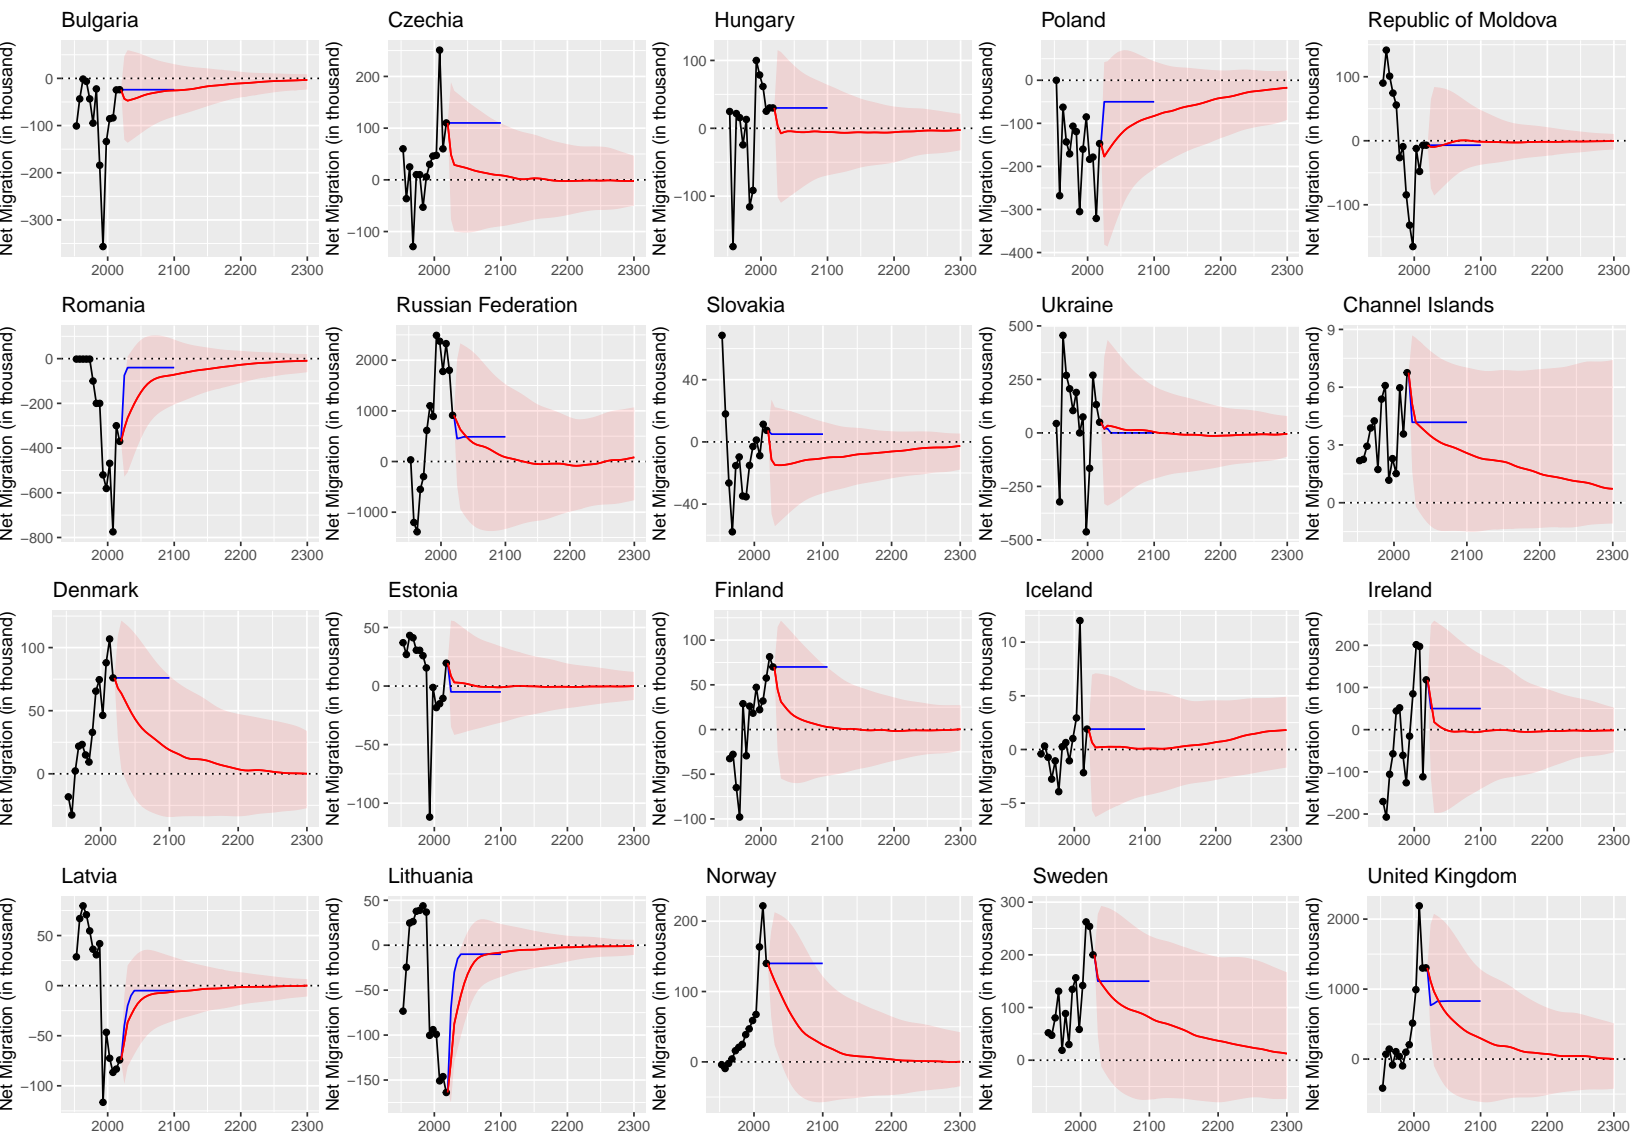

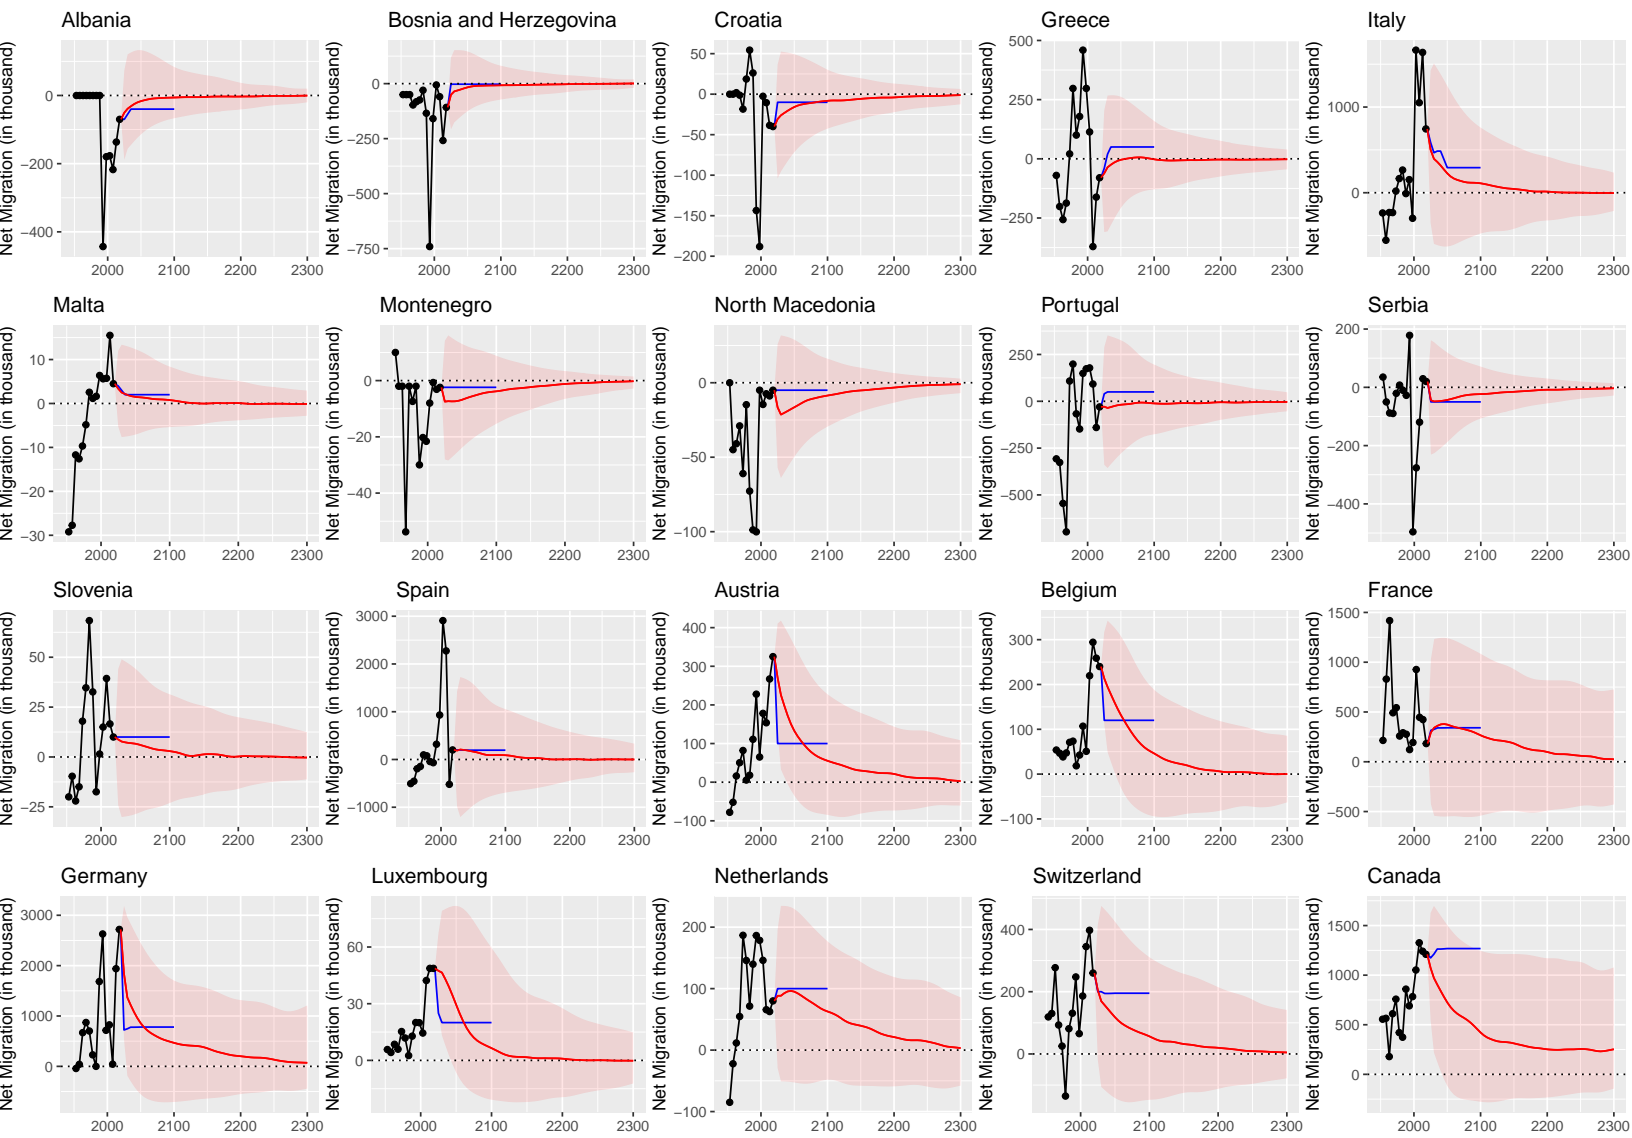

United States of America

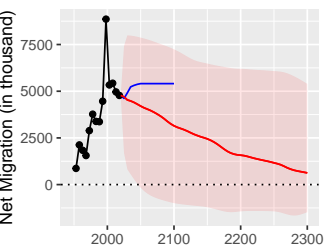



## D Population for all countries

Predictive Intervals for Total Population in 2100, 2200 and 2300 for all countries, in millions. Current (2020) population is also shown.

The plots show the historic population values for 1950–2020 (black circles), predictive median (red curve), 80% predictive interval (pink shaded area), UN medium projection to 2100 (blue curve), and UN 80% predictive interval to 2100 (blue shaded area).

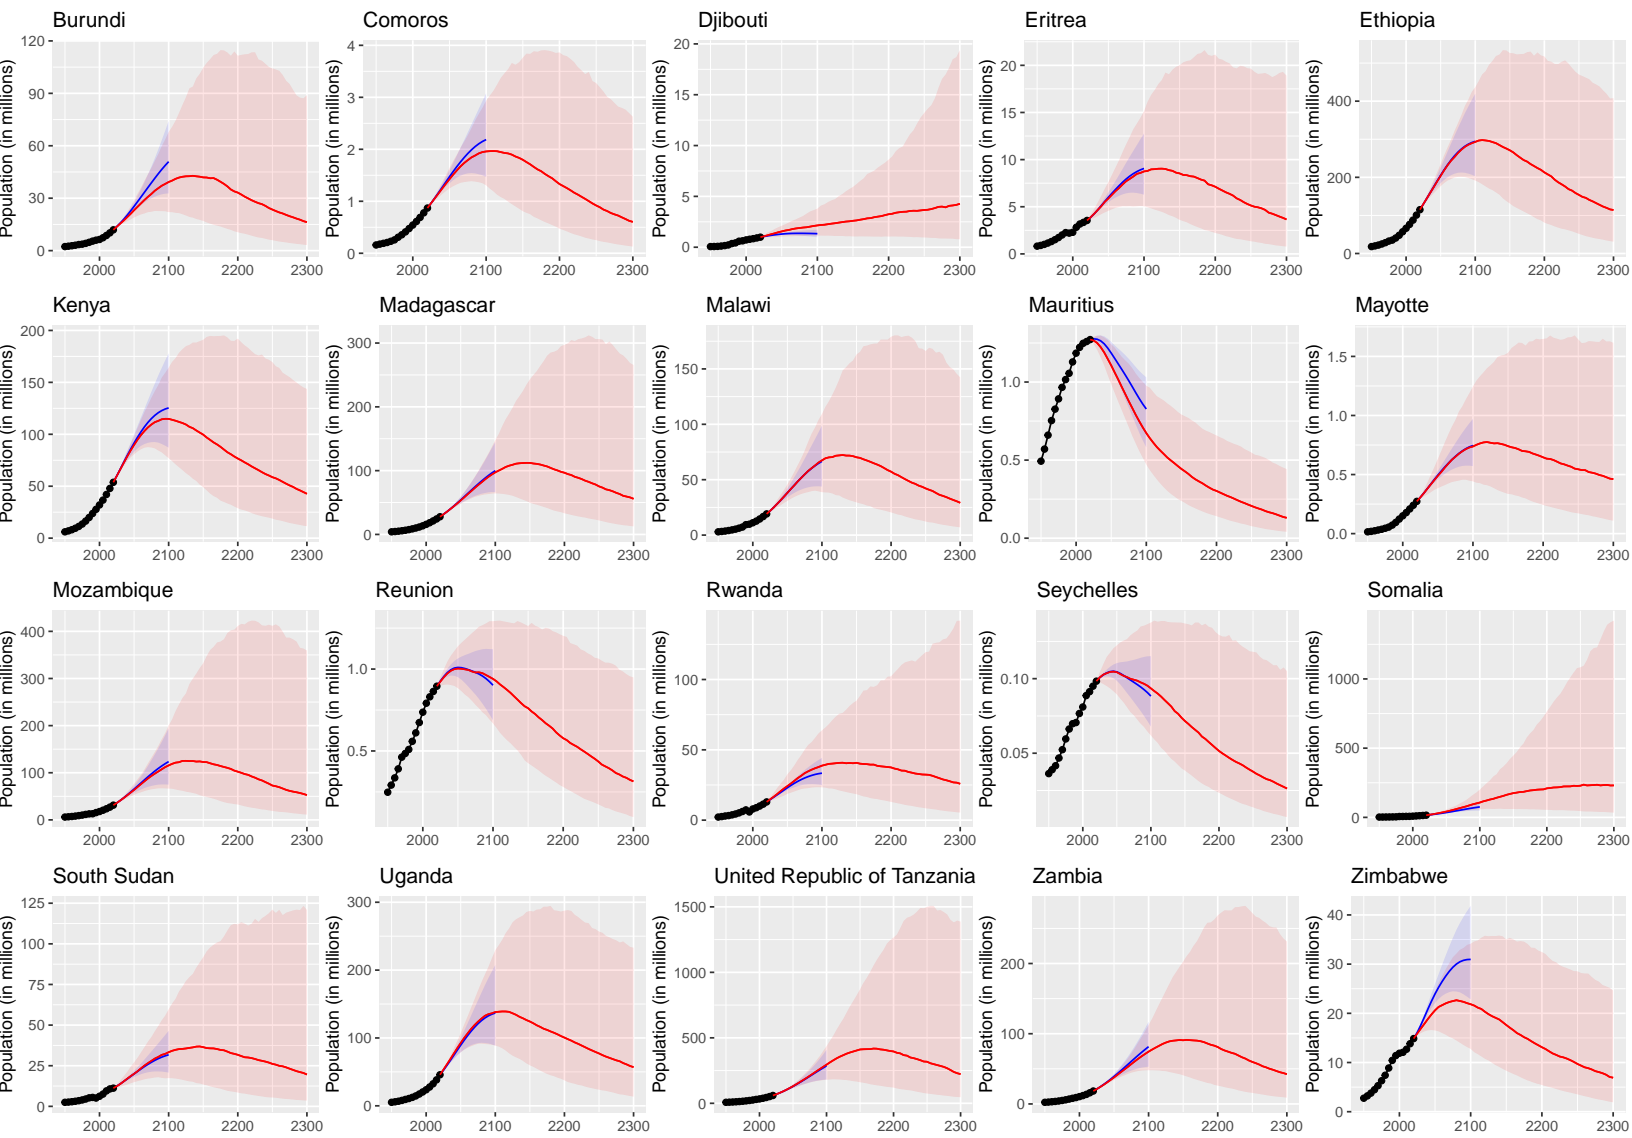

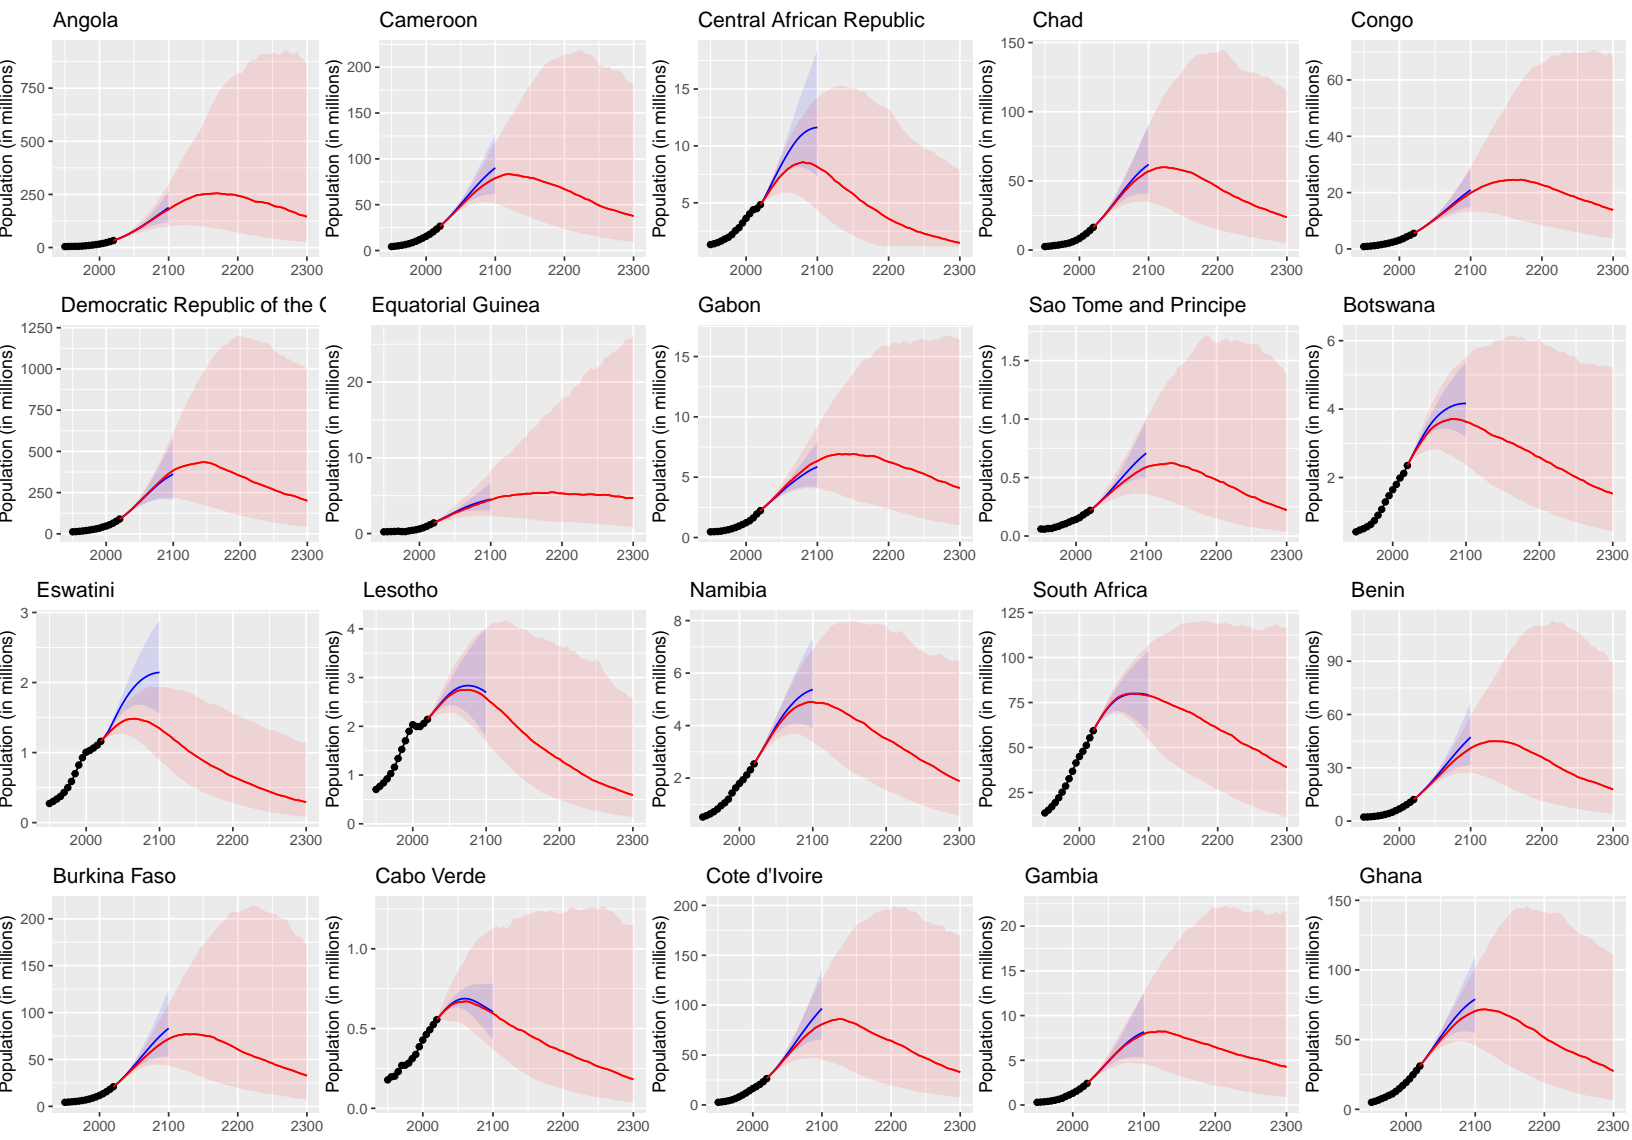

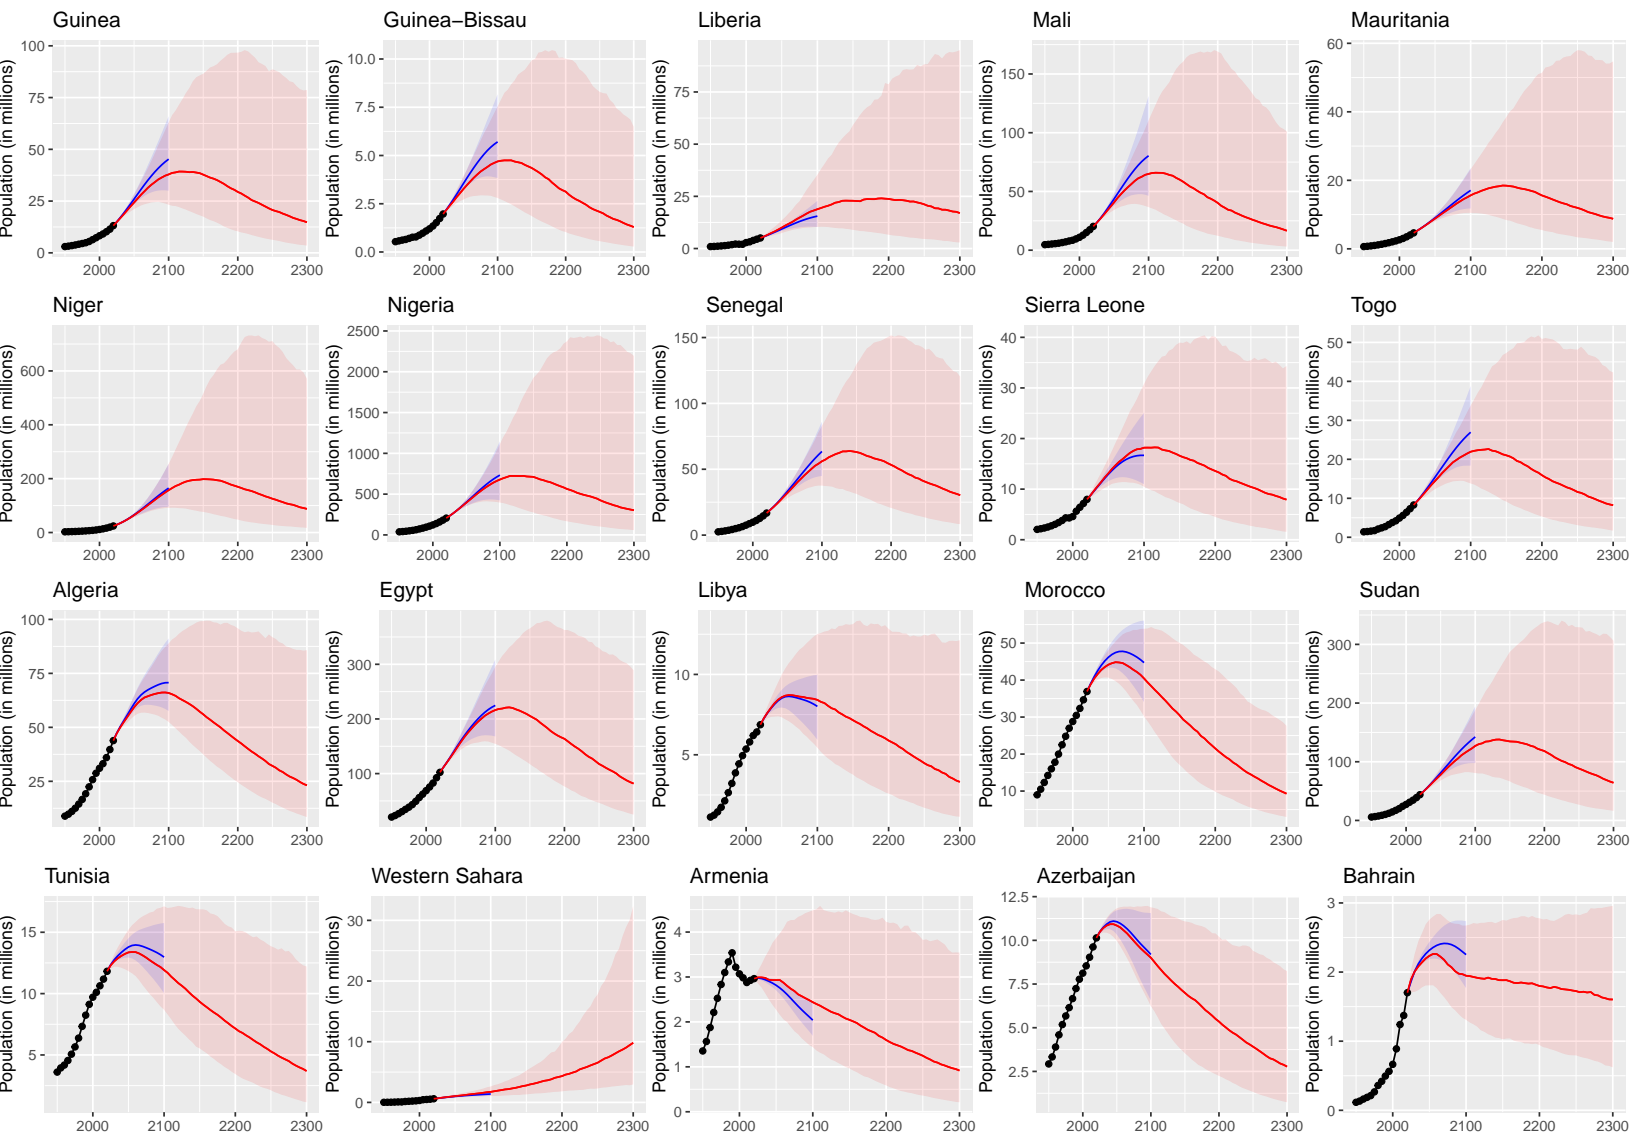

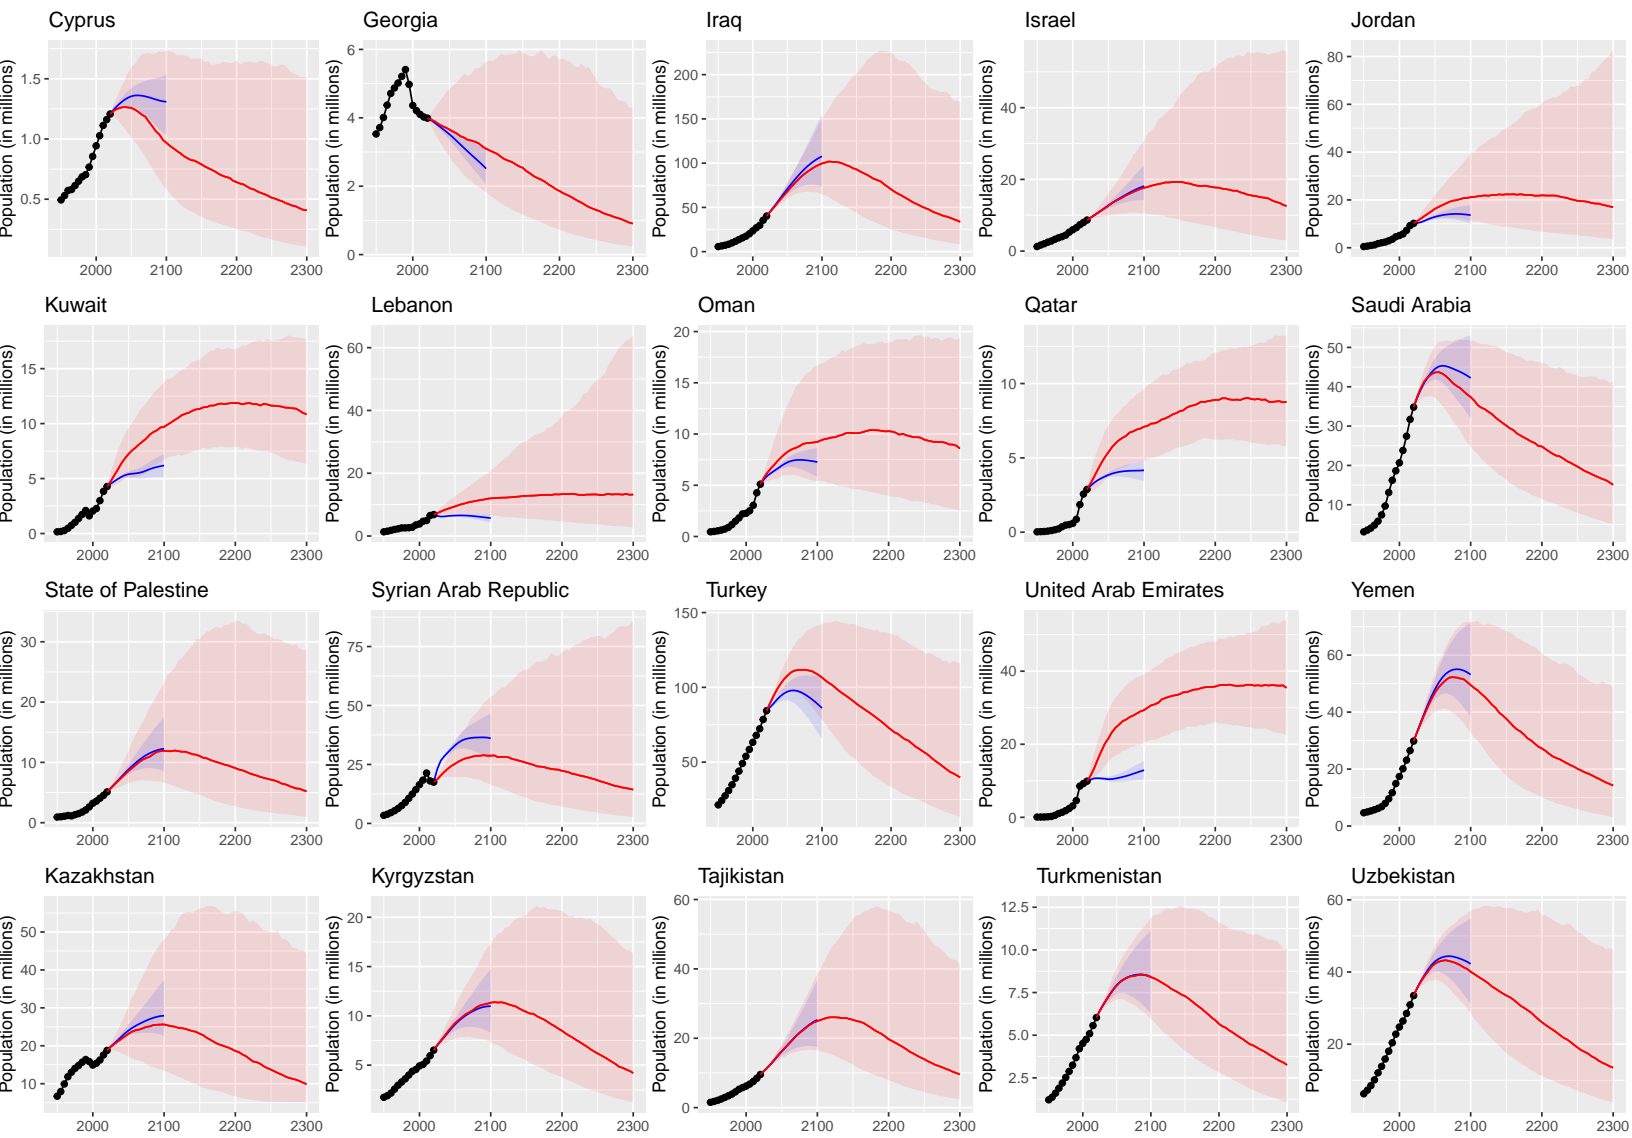

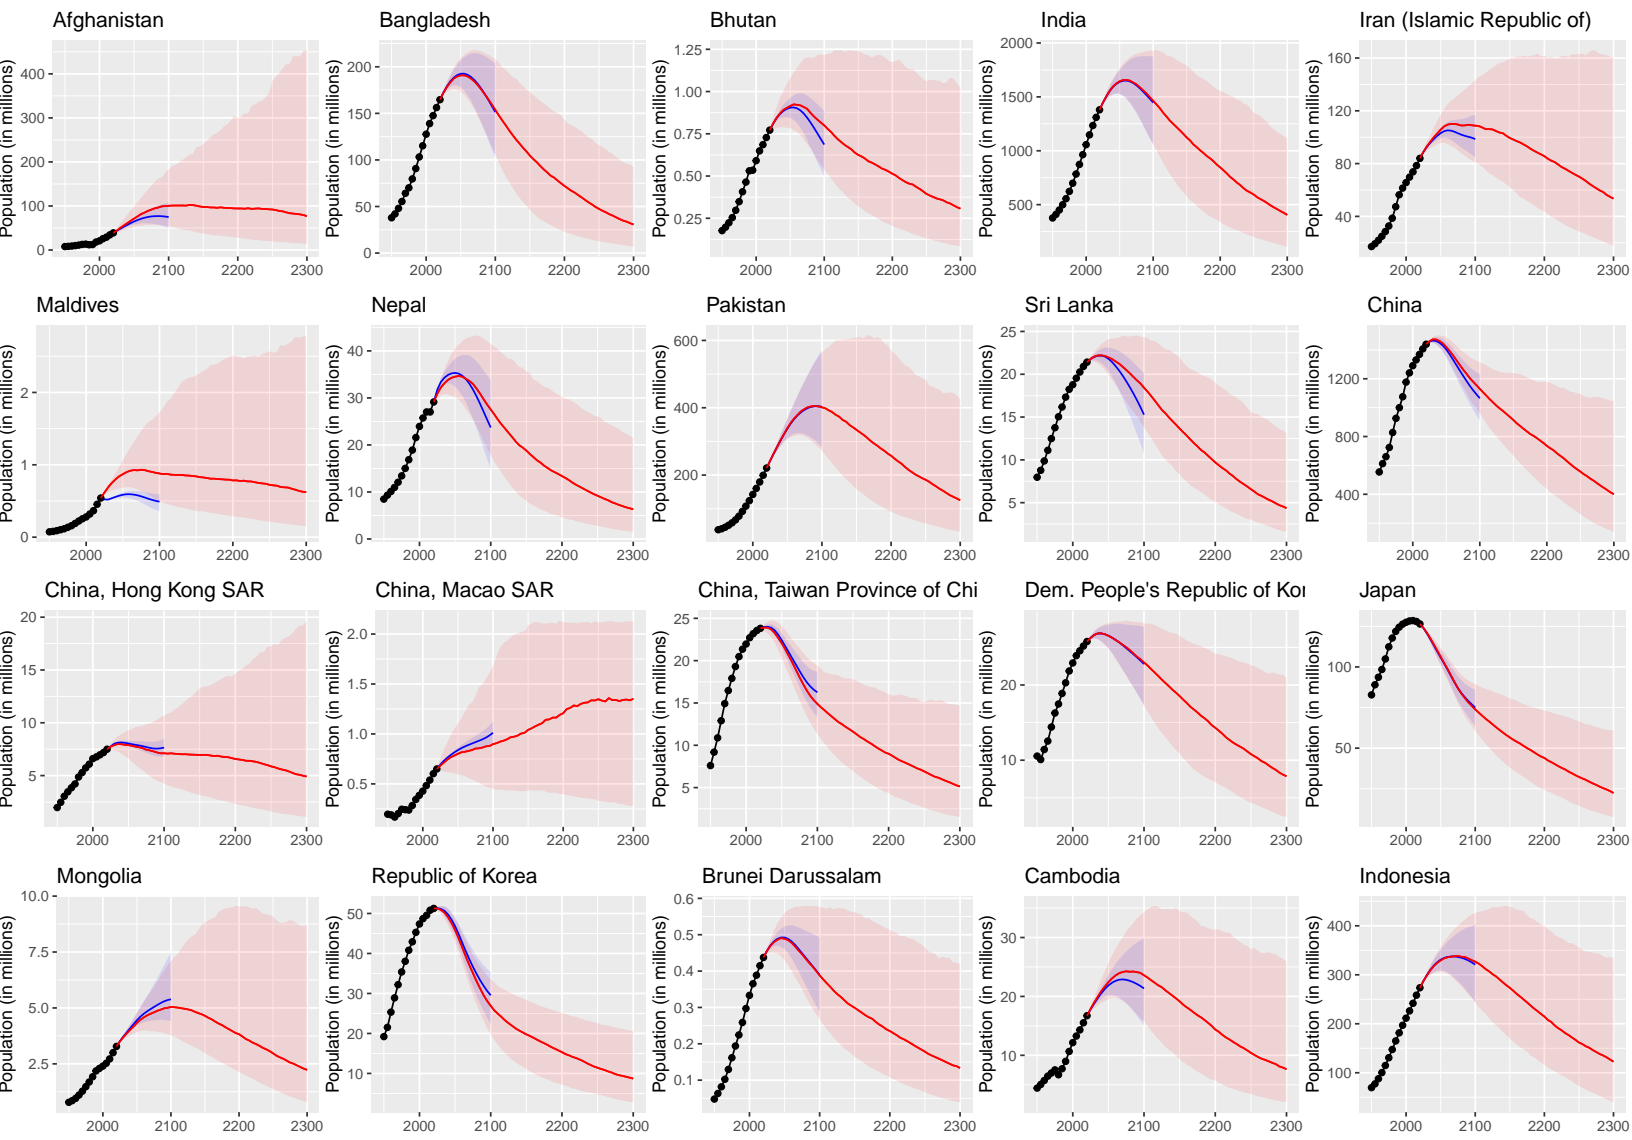

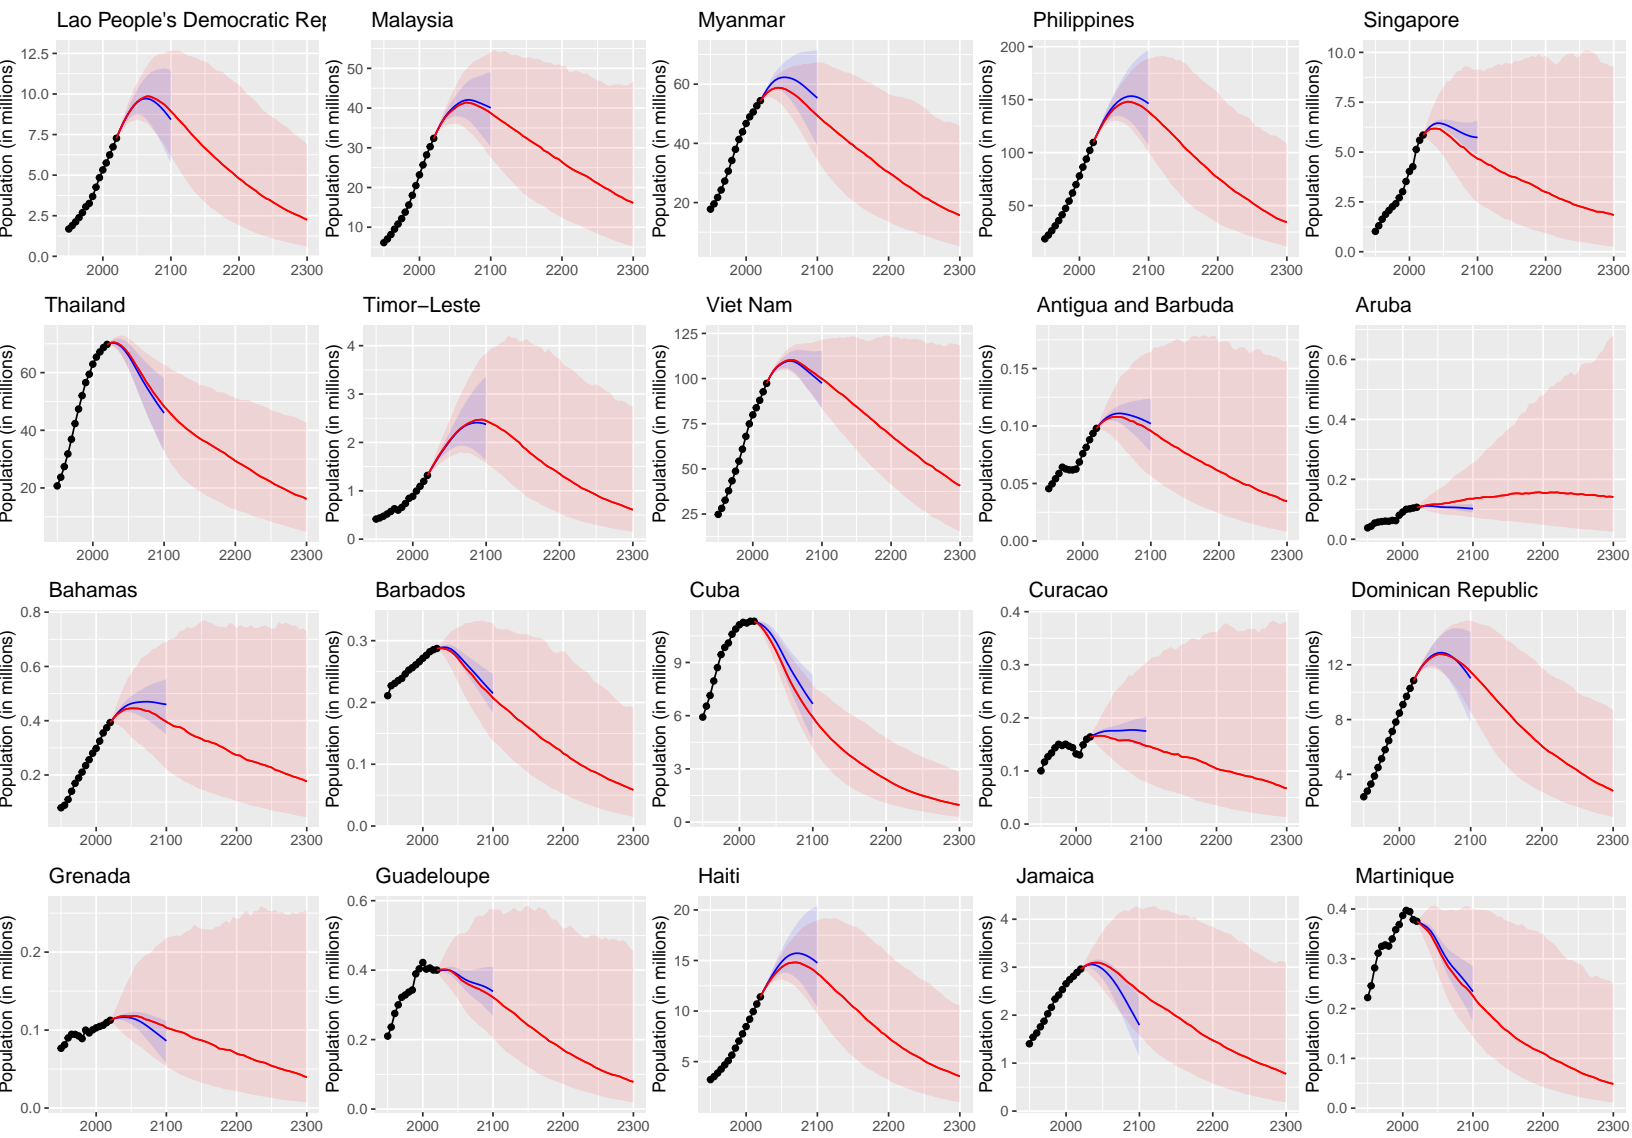



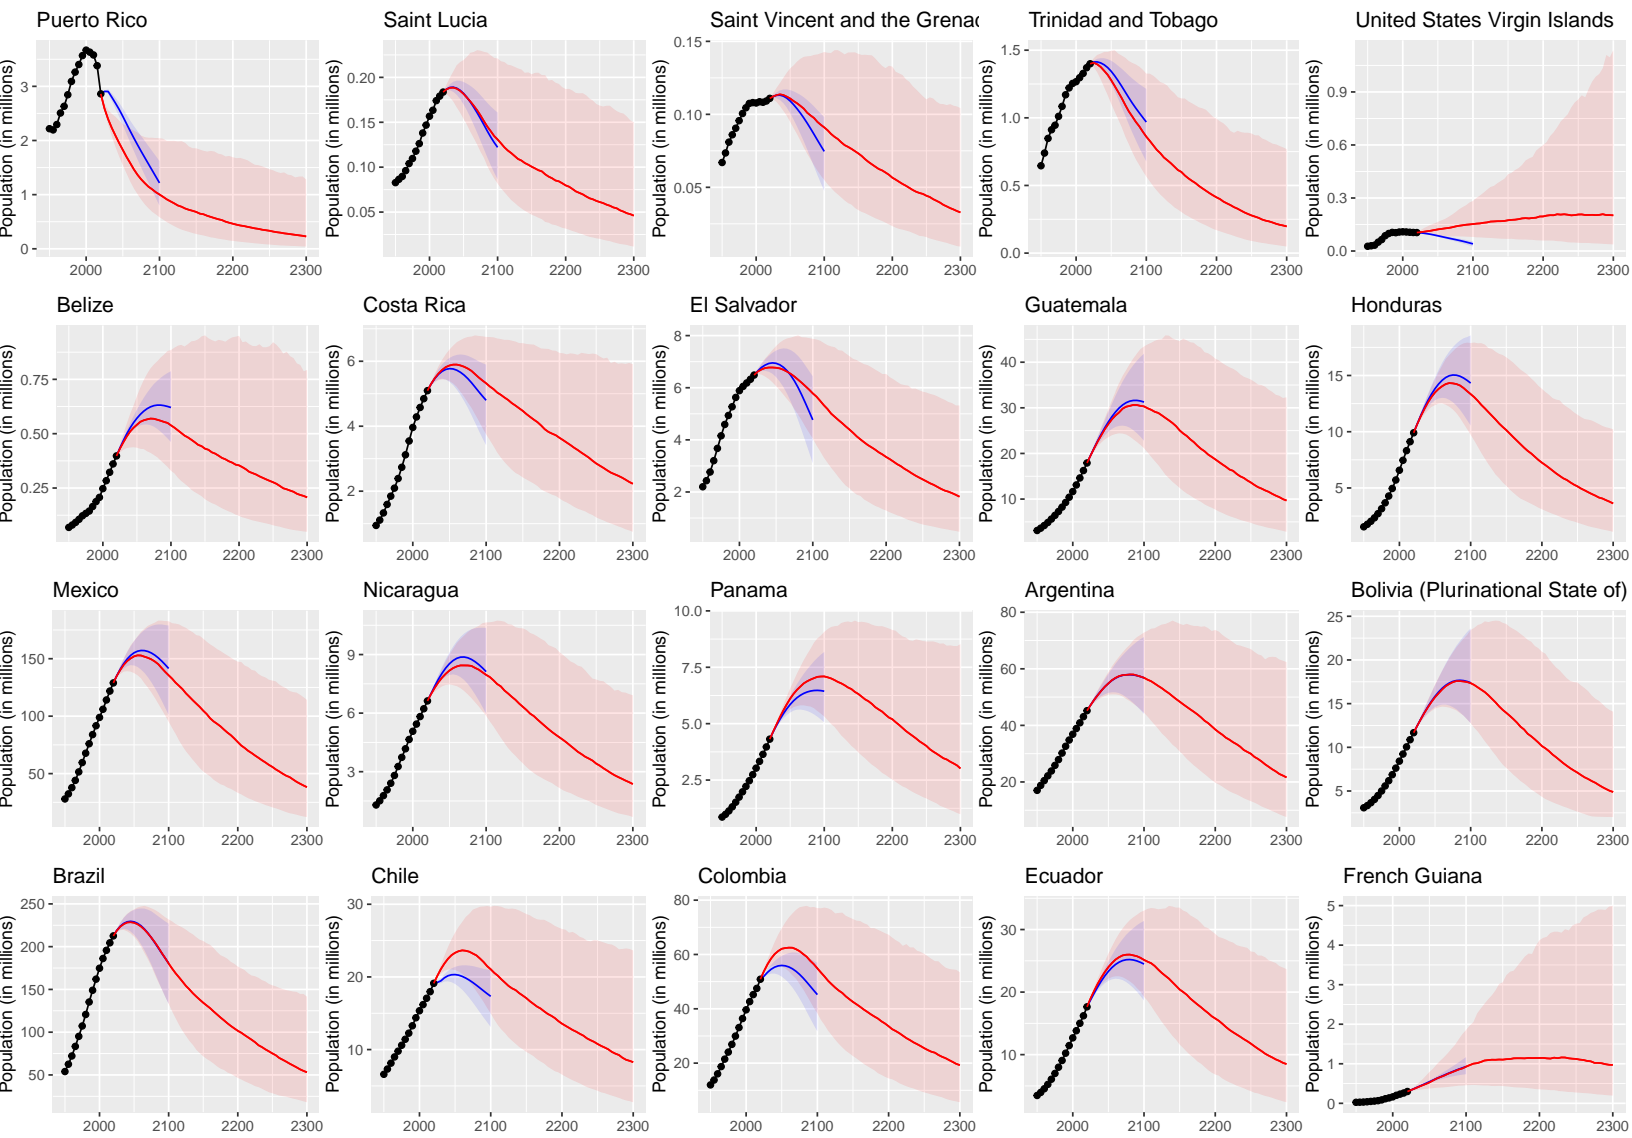

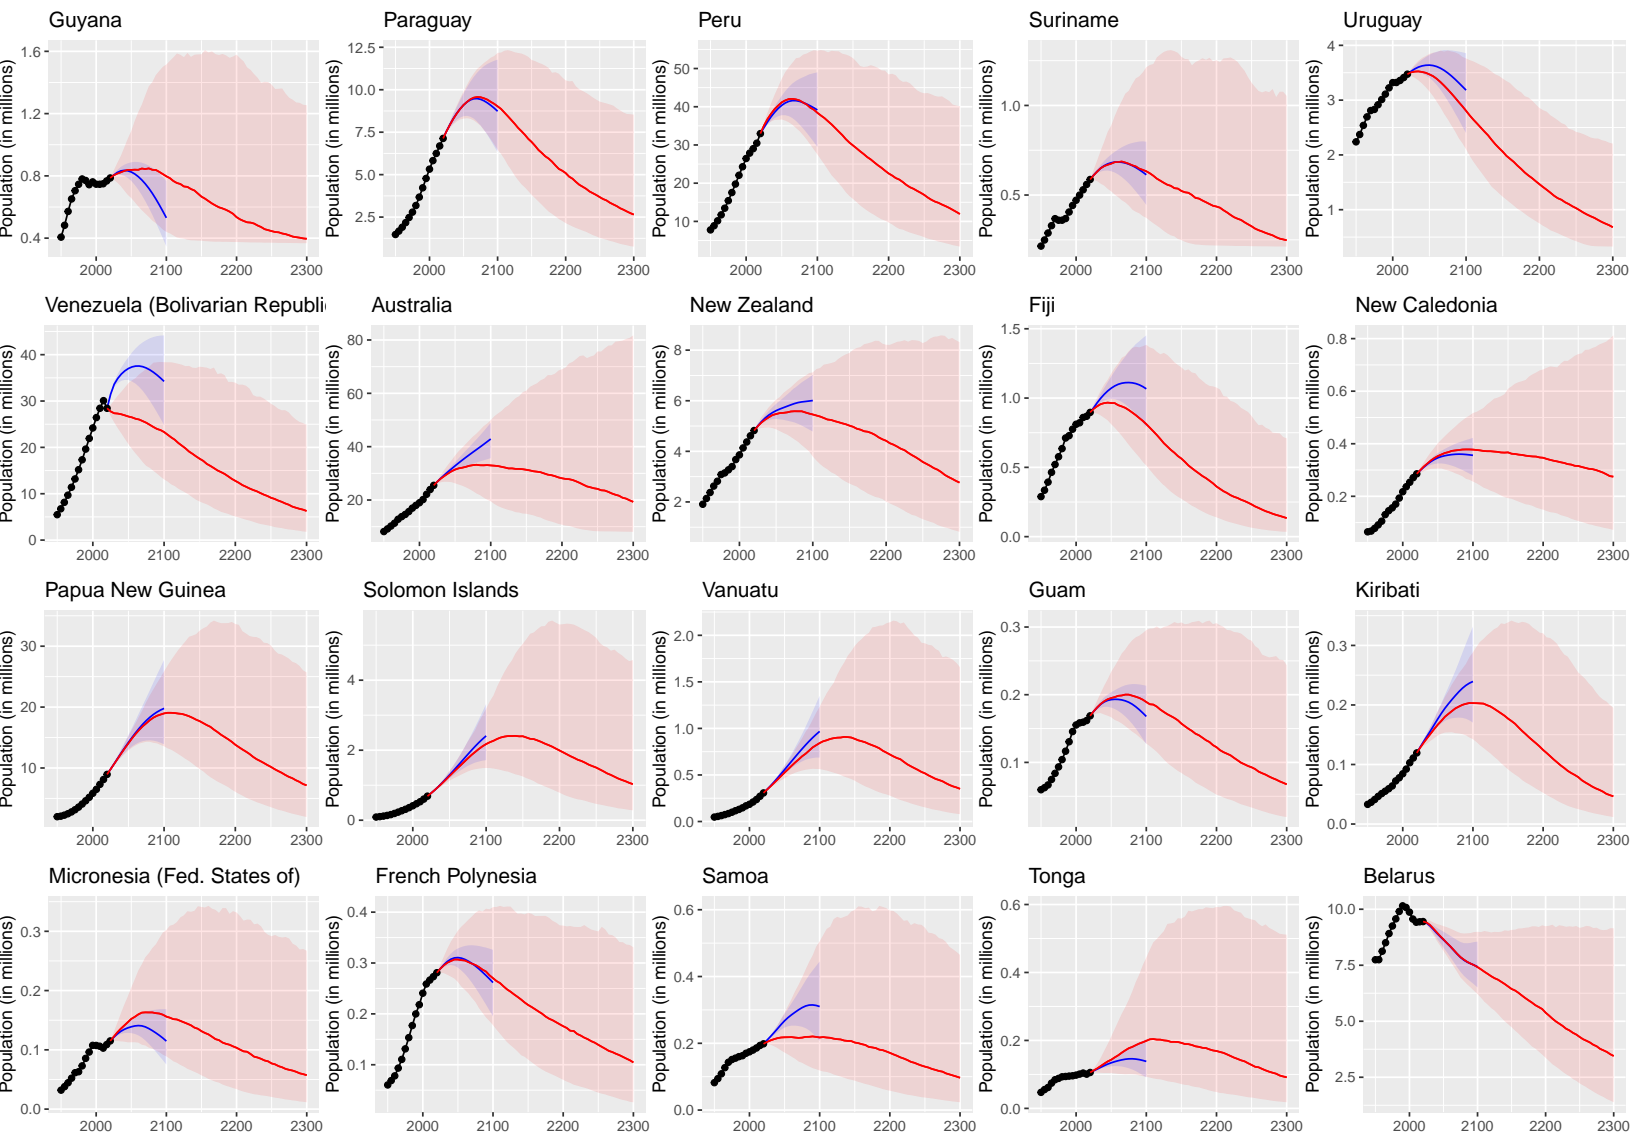

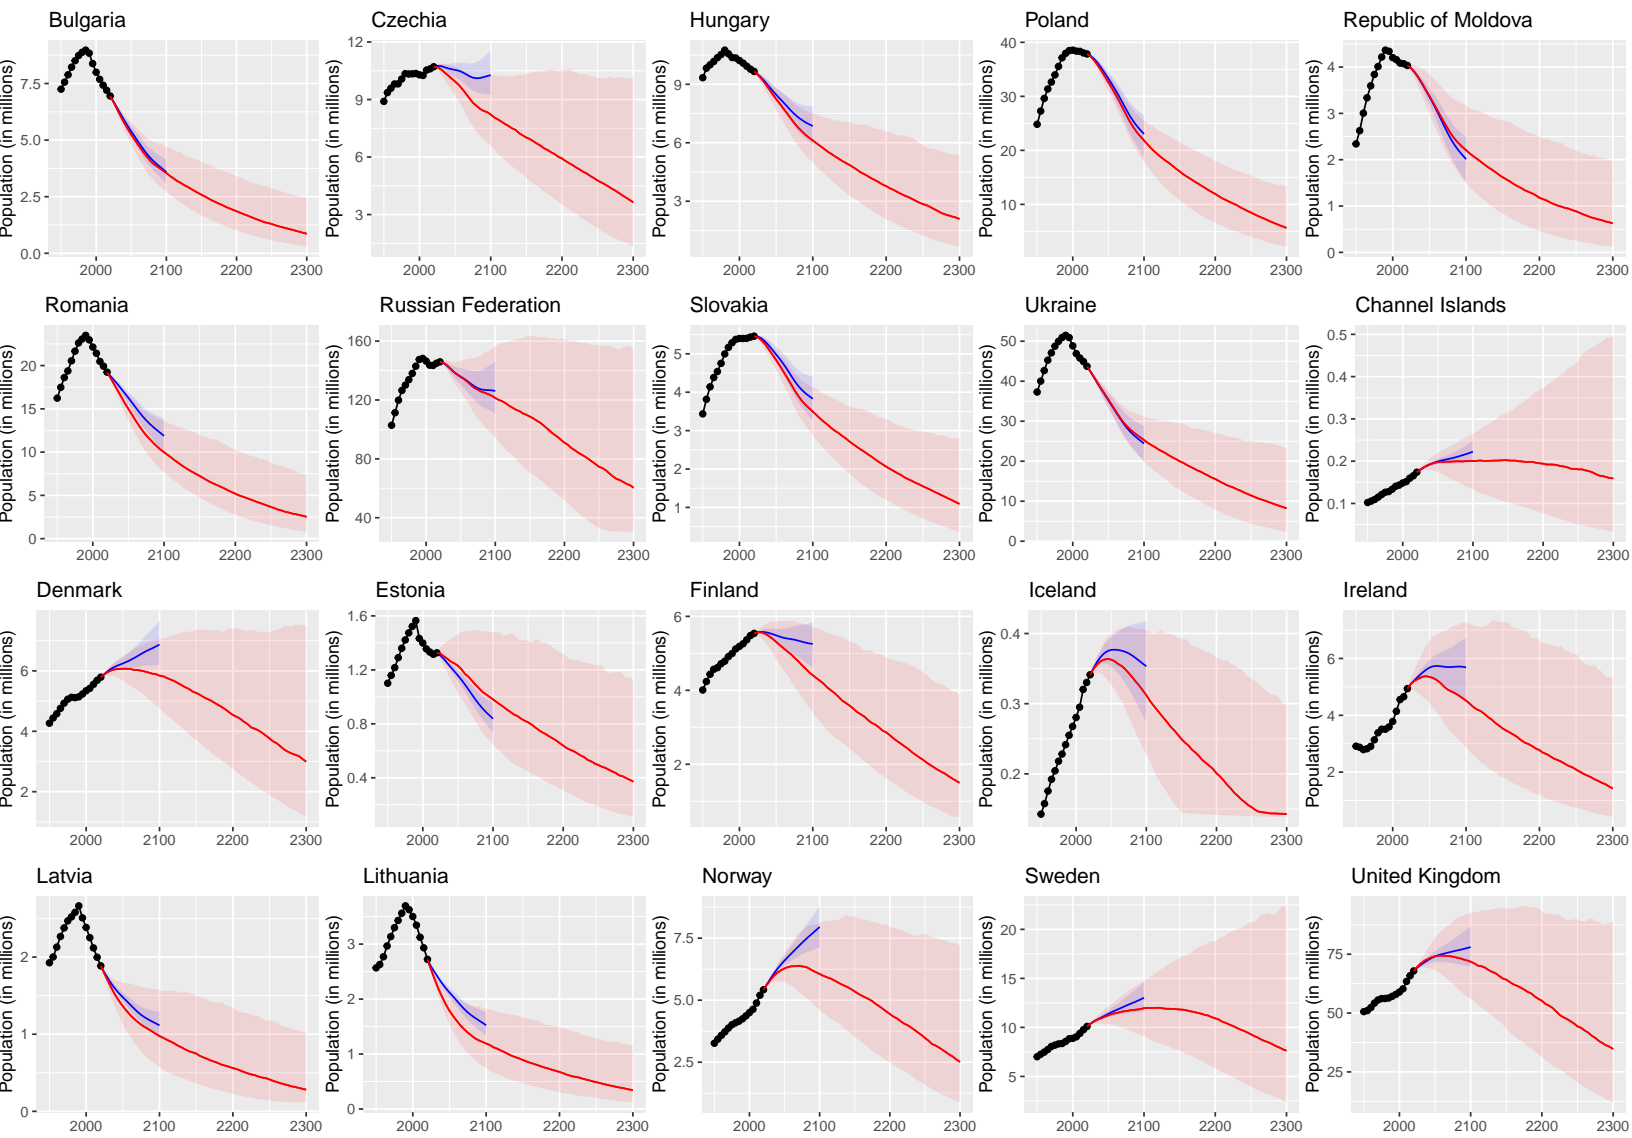

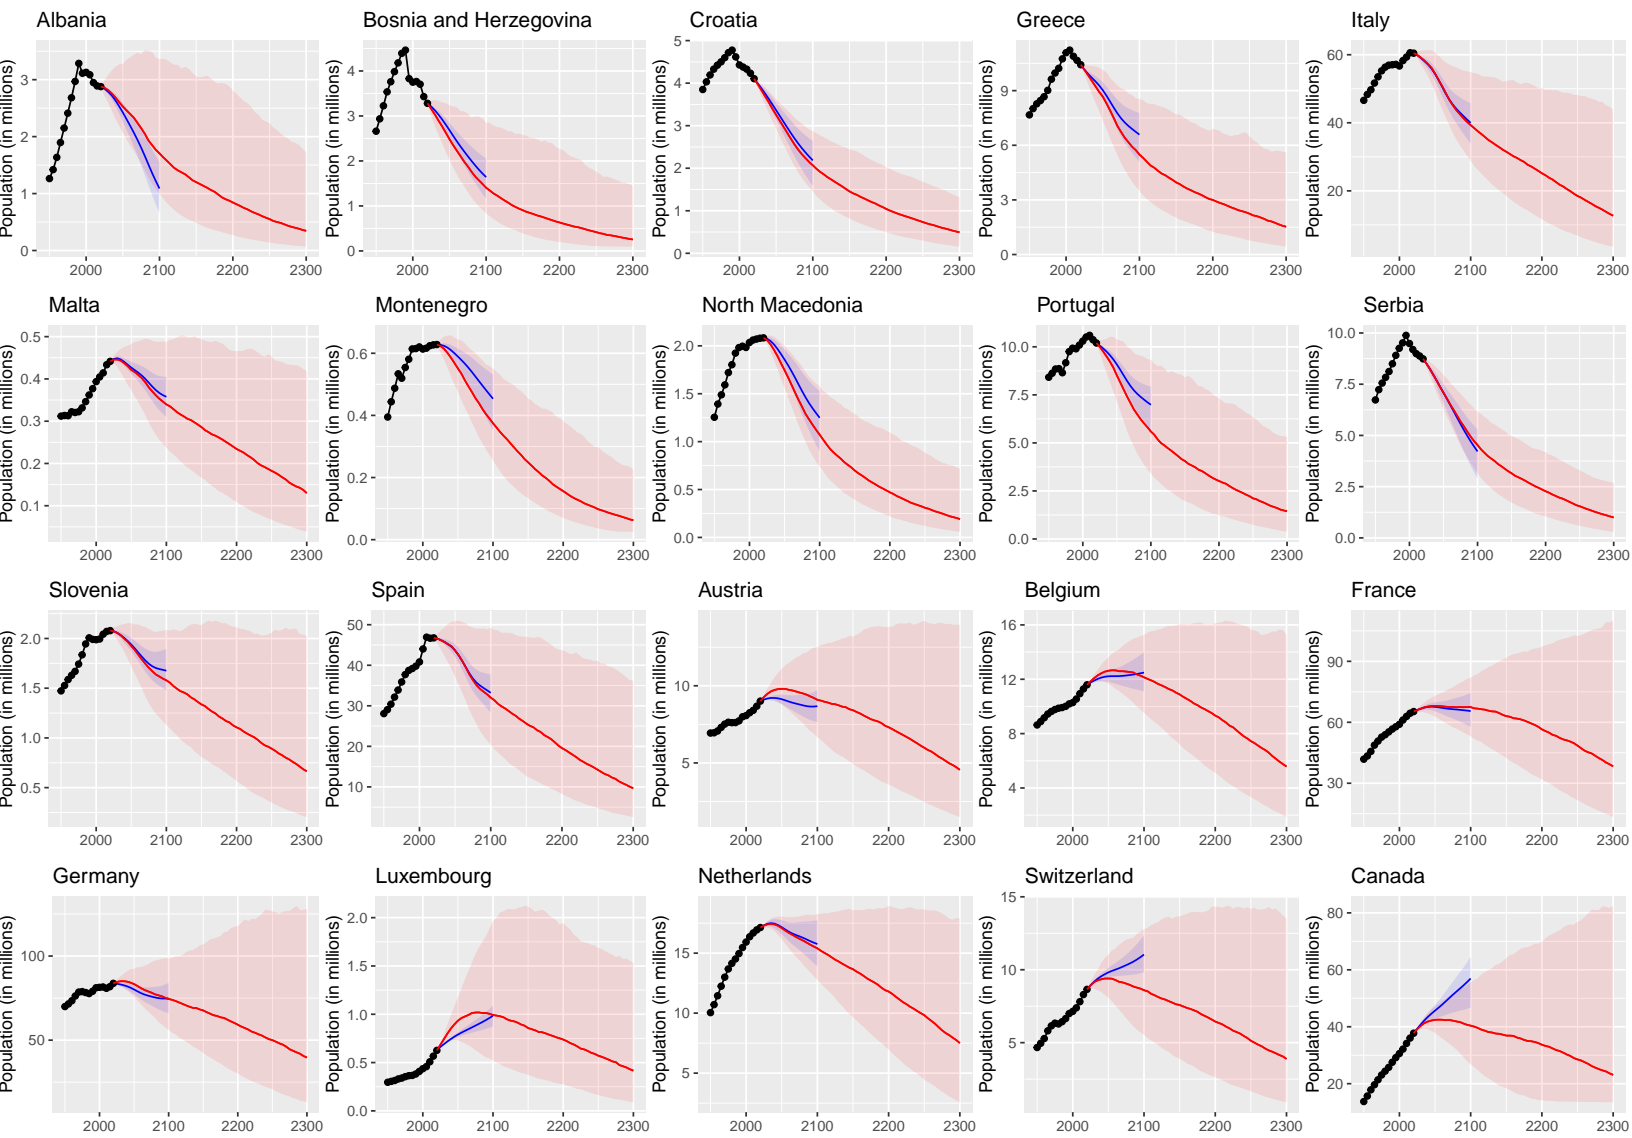

United States of America

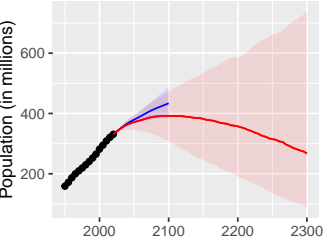

Supplement: NIHMS1742249-supplement-1.pdf [file NIHMS1742249-supplement-1.pdf]
